# Supplementary material for: Dual clumped isotope thermometry resolves kinetic biases in carbonate formation temperatures
Source: Nat Commun. 2020 Aug 10;11:4005. doi: 10.1038/s41467-020-17501-0 (PMC7418028; doi:10.1038/s41467-020-17501-0)
Supplement: Supplementary file 4 — Supplementary Data 2 [file 41467_2020_17501_MOESM4_ESM.xlsx]

## Sheet: equilibrium gases
ID	Sample	δ45 (raw)	δ45 (raw) SD	δ46 (raw)	δ46 (raw) SD	δ47 (raw)	δ47 (raw) SD	δ48 (raw)	δ48 (raw) SD	δ49 (raw)	δ49 (raw) SD	∆47 (raw)	∆47 (raw) SD	∆48 (raw)	∆48 (raw) SD	∆49 (raw)	∆49 (raw) SD	δ13C VPDB (CO2)	δ13C VPDB (CO2) SD	δ18O VSMOW (CO2)	δ18O VSMOW (CO2) SD	Acquisitions
2019-04-05 17:59 CEST	HG	-17.434	0.003	-7.456	0.003	-26.016	0.021	-15.154	0.121	-32.852	2.831	-0.855	0.02	-0.302	0.126	0.052	2.925	-22.5	0	17.65	0	13
2019-04-08 21:02 CEST	HG	-0.015	0.002	-0.809	0.004	-1.675	0.026	-1.936	0.08	-2.66	3.173	-0.866	0.026	-0.319	0.081	-1.057	3.175	-4.19	0	24.43	0	13
2019-04-09 17:47 CEST	HG	6.428	0.002	11.374	0.002	17.024	0.023	22.506	0.134	32.095	2.867	-0.849	0.021	-0.364	0.13	2.541	2.784	2.23	0	36.92	0	13
2019-04-10 18:50 CEST	HG	-16.79	0.002	-7.136	0.004	-25.064	0.019	-14.535	0.074	-35.439	3.817	-0.87	0.022	-0.319	0.074	-3.951	3.945	-21.83	0	17.97	0	13
2019-04-12 13:37 CEST	HG	-0.102	0.002	-1.493	0.003	-2.429	0.022	-3.289	0.091	-2.119	4.223	-0.858	0.024	-0.307	0.09	0.923	4.237	-4.25	0	23.73	0	13
2019-04-15 17:48 CEST	HG	6.44	0.002	13.144	0.004	18.786	0.018	26.106	0.13	37.128	3.111	-0.849	0.016	-0.346	0.13	3.961	3.013	2.18	0	38.74	0	13
2019-04-16 18:58 CEST	HG	-18.014	0.002	-7.653	0.003	-26.806	0.027	-15.539	0.097	-38.268	3.954	-0.861	0.027	-0.295	0.096	-4.533	4.087	-23.11	0	17.45	0	13
2019-04-17 19:48 CEST	HG	-0.013	0.002	-0.497	0.003	-1.368	0.026	-1.352	0.101	-1.742	3.642	-0.866	0.028	-0.359	0.104	-0.753	3.647	-4.2	0	24.75	0	13
2019-04-23 18:32 CEST	HG	6.494	0.003	12.786	0.003	18.481	0.017	25.361	0.071	31.001	2.054	-0.856	0.019	-0.364	0.068	-1.332	1.991	2.25	0	38.37	0	13
2019-04-24 19:39 CEST	HG	-17.325	0.002	-7.312	0.002	-25.76	0.022	-14.895	0.077	-33.558	3.087	-0.85	0.024	-0.33	0.078	-1.082	3.192	-22.39	0	17.8	0	13
2019-04-25 16:25 CEST	HG	-0.033	0.002	-1.095	0.004	-1.973	0.013	-2.546	0.087	-2.582	2.967	-0.863	0.011	-0.358	0.088	-0.397	2.975	-4.19	0	24.14	0	13
2019-04-26 19:32 CEST	HG	6.448	0.002	11.402	0.004	17.054	0.027	22.545	0.074	34.424	3.757	-0.868	0.029	-0.381	0.075	4.727	3.647	2.25	0	36.95	0	13
2019-04-29 19:15 CEST	HG	-14.347	0.002	-6.193	0.003	-21.661	0.021	-12.634	0.088	-30.115	2.515	-0.881	0.022	-0.29	0.089	-2.962	2.583	-19.26	0	18.94	0	13
2019-04-30 20:33 CEST	HG	0.07	0.002	-0.42	0.003	-1.206	0.029	-1.18	0.098	-0.088	2.553	-0.866	0.029	-0.34	0.099	0.663	2.557	-4.11	0	24.83	0	13
2019-05-02 19:23 CEST	HG	6.447	0.003	13.14	0.002	18.782	0.025	26.124	0.069	33.916	3.467	-0.856	0.025	-0.319	0.067	0.853	3.355	2.19	0	38.73	0	13
2019-05-03 18:06 CEST	HG	-14.086	0.003	-6.442	0.004	-21.599	0.027	-13.153	0.113	-28.45	3.351	-0.844	0.027	-0.314	0.117	-1.039	3.445	-18.97	0	18.68	0	13
2019-05-06 19:51 CEST	HG	-0.017	0.001	-0.543	0.003	-1.412	0.02	-1.457	0.119	-2.566	3.13	-0.861	0.019	-0.372	0.12	-1.483	3.135	-4.2	0	24.7	0	13
2019-05-08 19:57 CEST	HG	6.498	0.002	13.274	0.004	18.968	0.018	26.339	0.095	34.935	3.573	-0.856	0.019	-0.374	0.094	1.525	3.455	2.24	0	38.87	0	13
2019-05-10 15:49 CEST	HG	-14.268	0.001	-6.325	0.003	-21.707	0.023	-12.952	0.108	-28.51	4.682	-0.879	0.022	-0.346	0.113	-1.136	4.815	-19.17	0	18.8	0	13
2019-05-14 15:25 CEST	HG	-0.065	0.003	-1.099	0.003	-2.02	0.024	-2.525	0.089	0.35	3.051	-0.874	0.025	-0.33	0.088	2.583	3.057	-4.23	0	24.13	0	13
2019-05-15 20:10 CEST	HG	6.329	0.001	11.753	0.003	17.258	0.027	23.3	0.09	35.941	5.197	-0.885	0.028	-0.337	0.088	5.641	5.047	2.11	0	37.31	0	13
2019-05-16 19:16 CEST	HG	-17.102	0.002	-7.184	0.002	-25.435	0.031	-14.648	0.114	-34.043	2.541	-0.876	0.03	-0.336	0.118	-2.076	2.625	-22.16	0	17.93	0	13
2019-05-20 19:53 CEST	HG	-0.056	0.002	-0.454	0.003	-1.374	0.028	-1.233	0.119	1.34	4.314	-0.87	0.025	-0.325	0.12	2.294	4.315	-4.24	0	24.79	0	13
2019-05-22 22:07 CEST	HG	6.437	0.001	12.86	0.003	18.47	0.028	25.533	0.111	38.515	3.281	-0.881	0.028	-0.343	0.111	5.861	3.178	2.19	0	38.44	0	13
2019-05-28 22:28 CEST	HG	-10.284	0.001	-4.731	0.002	-16.053	0.026	-9.821	0.104	-14.891	3.594	-0.855	0.027	-0.384	0.105	5.349	3.669	-14.98	0	20.43	0	12
2019-05-29 15:55 CEST	HG	-0.09	0.002	-1.216	0.003	-2.15	0.03	-2.711	0.094	1.438	2.148	-0.864	0.03	-0.282	0.096	3.931	2.153	-4.25	0	24.01	0	13
2019-05-31 18:45 CEST	HG	6.375	0.002	13.193	0.005	18.733	0.025	26.129	0.1	29.641	2.466	-0.882	0.024	-0.421	0.103	-3.312	2.388	2.11	0	38.79	0	13
2019-06-03 18:05 CEST	HG	-10.285	0.002	-4.571	0.003	-15.912	0.022	-9.412	0.067	-12.772	2.931	-0.869	0.023	-0.294	0.072	7.192	2.988	-14.99	0	20.59	0	13
2019-06-05 18:44 CEST	HG	-0.075	0.002	-1.331	0.003	-2.249	0.024	-2.989	0.103	1.141	2.093	-0.864	0.023	-0.329	0.107	3.846	2.098	-4.23	0	23.89	0	13
2019-06-07 20:44 CEST	HG	6.414	0.002	11.995	0.003	17.597	0.025	23.765	0.079	29.808	3.252	-0.875	0.025	-0.361	0.077	-0.872	3.154	2.19	0	37.56	0	13
2019-06-12 19:54 CEST	HG	-11.65	0.001	-5.639	0.003	-18.332	0.032	-11.606	0.085	-18.067	2.52	-0.851	0.033	-0.364	0.088	5.386	2.581	-16.41	0	19.5	0	13
2019-06-14 18:29 CEST	HG	-0.068	0.002	-0.497	0.004	-1.431	0.025	-1.311	0.116	0.788	2.021	-0.873	0.026	-0.317	0.118	1.84	2.02	-4.25	0	24.75	0	13
2019-06-17 18:34 CEST	HG	-17.032	0.003	-6.942	0.004	-25.132	0.034	-14.134	0.099	-21.805	2.8	-0.879	0.033	-0.304	0.103	10.005	2.894	-22.09	0	18.17	0	13
2019-06-19 21:37 CEST	HG	6.331	0.002	11.627	0.004	17.142	0.025	23.032	0.099	23.249	2.333	-0.879	0.026	-0.348	0.099	-6.437	2.264	2.12	0	37.18	0	13
2019-06-21 18:42 CEST	HG	-0.067	0.002	-0.516	0.003	-1.45	0.021	-1.369	0.1	1.439	1.965	-0.874	0.019	-0.336	0.101	2.527	1.967	-4.25	0	24.73	0	13
2019-06-24 17:51 CEST	HG	-11.763	0.002	-5.17	0.003	-18.005	0.026	-10.672	0.079	-13.614	2.484	-0.865	0.025	-0.364	0.082	9.131	2.539	-16.54	0	19.98	0	13
2019-06-26 17:56 CEST	HG	6.137	0.003	11.15	0.003	16.482	0.026	22.042	0.124	23.401	2.042	-0.866	0.025	-0.374	0.122	-5.165	1.984	1.93	0	36.69	0	13
2019-06-28 19:15 CEST	HG	-0.063	0.003	-1.051	0.003	-1.946	0.025	-2.467	0.098	3.266	1.591	-0.849	0.026	-0.366	0.096	5.409	1.598	-4.23	0	24.18	0	13
2019-07-02 18:46 CEST	HG	-14.553	0.002	-6.316	0.003	-21.982	0.019	-12.948	0.089	-18.166	2.473	-0.872	0.019	-0.361	0.091	9.792	2.542	-19.47	0	18.81	0	13
2019-07-03 20:10 CEST	HG	6.457	0.003	11.218	0.003	16.883	0.016	22.234	0.094	28.882	2.677	-0.865	0.014	-0.32	0.094	-0.307	2.599	2.27	0	36.76	0	13
2019-07-05 14:36 CEST	HG	-0.072	0.003	-1.169	0.003	-2.1	0.027	-2.653	0.062	0.058	2.6	-0.877	0.028	-0.317	0.062	2.437	2.604	-4.23	0	24.06	0	13
2019-07-08 18:49 CEST	HG	-14.35	0.003	-6.086	0.003	-21.554	0.026	-12.484	0.1	-22.544	1.996	-0.874	0.024	-0.354	0.105	4.612	2.051	-19.27	0	19.05	0	13
2019-07-08 22:59 CEST	HG	-14.375	0.002	-6.272	0.002	-21.762	0.017	-12.905	0.121	-24.776	2.353	-0.876	0.017	-0.404	0.123	2.715	2.418	-19.29	0	18.86	0	13
2019-07-10 18:46 CEST	HG	6.497	0.002	12.525	0.004	18.213	0.028	24.833	0.075	30.663	2.579	-0.869	0.03	-0.364	0.069	-1.158	2.5	2.26	0	38.1	0	13
2019-07-12 14:21 CEST	HG	-0.083	0.003	-1.026	0.004	-1.963	0.025	-2.413	0.067	1.798	1.948	-0.87	0.026	-0.363	0.066	3.909	1.945	-4.25	0	24.21	0	13
2019-07-15 18:31 CEST	HG	-14.369	0.002	-6.101	0.003	-21.593	0.022	-12.522	0.104	-23.981	2.62	-0.88	0.022	-0.363	0.109	3.185	2.691	-19.29	0	19.03	0	13
2019-07-18 18:44 CEST	HG	6.456	0.003	12.898	0.005	18.547	0.017	25.632	0.108	29.099	2.826	-0.862	0.019	-0.323	0.108	-3.353	2.735	2.21	0	38.48	0	13
2019-07-19 16:03 CEST	HG	-0.168	0.002	-1.156	0.003	-2.183	0.022	-2.71	0.104	1.106	2.572	-0.874	0.023	-0.401	0.105	3.565	2.578	-4.34	0	24.07	0	13
2019-07-22 19:47 CEST	HG	-14.358	0.002	-6.101	0.003	-21.575	0.019	-12.503	0.115	-17.58	2.272	-0.872	0.021	-0.342	0.118	9.754	2.332	-19.27	0	19.03	0	13
2019-07-23 21:04 CEST	HG	6.36	0.003	12.675	0.004	18.24	0.021	25.14	0.066	26.603	2.146	-0.848	0.023	-0.361	0.066	-5.237	2.079	2.11	0	38.25	0	13
2019-07-25 20:03 CEST	HG	-0.02	0.002	-0.297	0.004	-1.182	0.021	-0.926	0.093	2.266	2.752	-0.869	0.022	-0.332	0.093	2.873	2.756	-4.21	0	24.96	0	13
2019-07-29 20:54 CEST	HG	-14.51	0.003	-6.16	0.005	-21.783	0.025	-12.62	0.095	-18.174	2.745	-0.867	0.027	-0.341	0.103	9.427	2.825	-19.43	0	18.97	0.01	13
2019-07-31 19:46 CEST	HG	6.451	0.004	13.076	0.005	18.705	0.032	25.927	0.089	26.985	2.807	-0.874	0.031	-0.387	0.089	-5.738	2.711	2.19	0	38.67	0	13
2019-08-01 16:55 CEST	HG	-0.079	0.002	-1.26	0.005	-2.19	0.028	-2.835	0.098	0.747	2.665	-0.871	0.027	-0.317	0.1	3.314	2.669	-4.24	0	23.97	0.01	13
2019-04-05 22:07 CEST	25G	-33.953	0.002	6.794	0.004	-28.565	0.03	13.567	0.094	-21.621	3.662	0.025	0.03	-0.066	0.094	1.706	3.749	-40.63	0	32.31	0	13
2019-04-08 16:53 CEST	25G	-33.788	0.002	8.01	0.004	-27.239	0.029	16.066	0.085	-19.201	3.776	0.027	0.03	-0.018	0.084	1.623	3.857	-40.5	0	33.56	0	13
2019-04-09 21:56 CEST	25G	-33.818	0.003	7.685	0.003	-27.588	0.025	15.43	0.14	-21.381	2.868	0.016	0.026	0	0.141	0.062	2.925	-40.52	0	33.23	0	13
2019-04-10 14:41 CEST	25G	0.05	0.002	-3.096	0.003	-2.976	0.021	-6.158	0.073	-4.577	2.766	0.017	0.022	0.025	0.075	1.455	2.784	-4.03	0	22.08	0	13
2019-04-12 17:48 CEST	25G	1.229	0.002	32.742	0.005	33.518	0.023	66.452	0.101	74.016	1.968	0.03	0.022	-0.097	0.1	6.818	1.844	-4.09	0	58.86	0	13
2019-04-18 20:47 CEST	25G	-33.788	0.002	8.167	0.002	-27.11	0.015	16.333	0.116	-20.643	4.758	0.005	0.016	-0.066	0.112	-0.156	4.86	-40.51	0	33.72	0	13
2019-04-23 22:41 CEST	25G	-0.15	0.002	-3.52	0.002	-3.583	0.033	-7.026	0.103	-4.658	2.773	0.032	0.032	0.001	0.104	2.423	2.795	-4.23	0	21.65	0	13
2019-04-29 23:25 CEST	25G	1.108	0.003	31.617	0.005	32.275	0.026	64.2	0.104	71.568	2.975	0.023	0.025	-0.031	0.099	6.806	2.794	-4.18	0	57.71	0.01	13
2019-04-30 03:39 CEST	25G	1.194	0.002	31.929	0.003	32.669	0.02	64.78	0.107	72.844	3.892	0.019	0.02	-0.092	0.102	7.315	3.653	-4.1	0	58.03	0	13
2019-05-02 15:08 CEST	25G	-33.906	0.002	7.261	0.004	-28.076	0.026	14.57	0.095	-22.844	3.057	0.022	0.03	-0.005	0.094	-0.511	3.132	-40.6	0	32.79	0	13
2019-05-07 17:11 CEST	25G	-0.097	0.002	-3.418	0.005	-3.437	0.027	-6.837	0.09	-6.53	3.135	0.024	0.025	-0.012	0.093	0.281	3.156	-4.18	0	21.75	0	13
2019-05-13 18:41 CEST	25G	-33.996	0.002	6.866	0.002	-28.559	0.019	13.754	0.11	-22.141	3.542	0.006	0.021	-0.025	0.109	1.078	3.625	-40.68	0	32.39	0	13
2019-05-17 20:26 CEST	25G	-0.04	0.002	-2.942	0.003	-2.931	0.02	-5.912	0.095	-3.724	4.181	0.003	0.02	-0.036	0.098	2.104	4.207	-4.13	0	22.24	0	13
2019-05-21 21:12 CEST	25G	1.094	0.002	32.724	0.003	33.344	0.018	66.599	0.089	83.19	3.612	0.018	0.019	0.075	0.087	15.599	3.385	-4.23	0	58.84	0	13
2019-05-23 20:26 CEST	25G	-33.943	0.003	7.042	0.004	-28.342	0.017	14.137	0.081	-18.967	3.847	0.001	0.02	0.004	0.083	3.926	3.935	-40.63	0	32.57	0	13
2019-05-29 02:51 CEST	25G	-0.04	0.002	-3.34	0.004	-3.304	0.022	-6.67	0.099	-2.118	3.292	0.021	0.021	-0.002	0.103	4.507	3.313	-4.12	0	21.83	0	12
2019-05-31 22:54 CEST	25G	1.083	0.002	32.073	0.003	32.686	0.03	65.165	0.099	65.565	4.311	0.012	0.029	-0.009	0.093	0.324	4.046	-4.22	0	58.18	0	13
2019-06-04 17:15 CEST	25G	-33.952	0.002	7.198	0.002	-28.195	0.023	14.425	0.144	-12.902	4.025	0.01	0.023	-0.024	0.141	9.834	4.116	-40.64	0	32.73	0	13
2019-06-06 15:31 CEST	25G	0.862	0.002	32.88	0.003	33.241	0.027	66.9	0.103	71.434	2.405	0.009	0.025	0.055	0.098	4.526	2.257	-4.48	0	59	0	13
2019-06-11 16:49 CEST	25G	-0.105	0.002	-3.423	0.003	-3.461	0.024	-6.833	0.105	-1.376	3.189	0.013	0.023	0.002	0.108	5.488	3.213	-4.19	0	21.75	0	13
2019-06-14 22:39 CEST	25G	-33.88	0.002	7.868	0.003	-27.498	0.026	15.796	0.106	-13.744	3.255	-0.004	0.027	-0.002	0.106	7.576	3.323	-40.59	0	33.41	0	13
2019-06-18 19:51 CEST	25G	1.123	0.002	32.809	0.003	33.452	0.021	66.567	0.081	52.479	2.727	0.012	0.021	-0.119	0.075	-13.385	2.555	-4.2	0	58.93	0	13
2019-06-21 22:53 CEST	25G	-0.046	0.003	-3.382	0.004	-3.368	0.029	-6.735	0.113	-2.62	3.952	0.004	0.027	0.017	0.118	4.091	3.977	-4.12	0	21.79	0	13
2019-06-25 20:23 CEST	25G	-33.941	0.003	7.463	0.004	-27.92	0.027	14.934	0.093	-9.719	2.735	0.022	0.028	-0.048	0.093	12.555	2.793	-40.64	0	33	0	13
2019-06-27 19:11 CEST	25G	1.197	0.002	33.51	0.004	34.22	0.026	68.079	0.102	62.462	3.353	0.011	0.026	-0.06	0.099	-5.433	3.136	-4.15	0	59.65	0	13
2019-07-01 17:10 CEST	25G	-33.921	0.004	7.607	0.003	-27.758	0.02	15.285	0.094	-7.569	2.891	0.028	0.023	0.013	0.093	14.446	2.952	-40.63	0	33.15	0	13
2019-07-04 17:19 CEST	25G	-0.034	0.002	-3.175	0.004	-3.148	0.019	-6.326	0.072	-2.335	1.829	0.01	0.02	0.014	0.077	3.956	1.844	-4.12	0	22	0	13
2019-07-09 21:29 CEST	25G	1.124	0.002	32.957	0.002	33.618	0.027	67.107	0.061	70.302	4.377	0.03	0.027	0.099	0.059	3.037	4.101	-4.21	0	59.08	0	13
2019-07-11 17:17 CEST	25G	-33.911	0.002	7.703	0.003	-27.686	0.025	15.445	0.073	-19.276	2.169	-0.002	0.024	-0.019	0.071	2.282	2.216	-40.62	0	33.24	0	13
2019-07-16 20:01 CEST	25G	-0.034	0.003	-3.362	0.003	-3.311	0.033	-6.726	0.087	-1.426	1.888	0.029	0.033	-0.014	0.089	5.24	1.898	-4.11	0	21.81	0	13
2019-07-18 22:53 CEST	25G	1.169	0.003	33.376	0.004	34.069	0.025	67.896	0.149	62.15	2.906	0.022	0.022	0.027	0.141	-5.442	2.721	-4.18	0	59.51	0	13
2019-07-24 18:16 CEST	25G	-33.909	0.002	7.62	0.004	-27.74	0.022	15.266	0.144	-9.391	1.891	0.02	0.022	-0.032	0.144	12.545	1.93	-40.61	0	33.16	0	13
2019-07-26 17:20 CEST	25G	-0.081	0.002	-3.333	0.004	-3.339	0.033	-6.669	0.085	1.927	2.593	0.02	0.033	-0.015	0.087	8.608	2.614	-4.16	0	21.84	0	13
2019-07-30 18:20 CEST	25G	1.171	0.003	33.334	0.004	34.016	0.036	67.678	0.06	50.868	2.552	0.008	0.032	-0.094	0.057	-15.929	2.388	-4.17	0	59.47	0	13
2019-08-02 18:10 CEST	25G	-33.991	0.002	7.493	0.004	-27.953	0.019	15.077	0.099	-13.297	2.773	0.012	0.022	0.034	0.103	8.894	2.832	-40.7	0	33.03	0	13
2019-08-05 18:56 CEST	25G	-0.11	0.002	-3.694	0.003	-3.722	0.01	-7.365	0.1	-1.825	1.865	0.024	0.01	0.01	0.1	1.878	5.58	-4.18	0	21.47	0	13
m/z 47.5 scaling factors
on m/z 47	-0.988
on m/z 48	-0.906
on m/z 49	-0.648

## Sheet: standards
ID	Sample	δ45 (raw)	δ45 (raw) SD	δ46 (raw)	δ46 (raw) SD	δ47 (raw)	δ47 (raw) SD	δ48 (raw)	δ48 (raw) SD	δ49 (raw)	δ49 (raw) SD	∆47 (raw)	∆47 (raw) SD	∆48 (raw)	∆48 (raw) SD	∆49 (raw)	∆49 (raw) SD	δ13C VPDB (CO2)	δ13C VPDB (CO2) SD	δ18O VSMOW (CO2)	δ18O VSMOW (CO2) SD	Acquisitions	∆47 (CDES90,uc)	∆48 (CDES90,uc)
2019-04-06 06:26 CEST	ETH 1	6.422	0.002	11.453	0.003	17.273	0.023	22.746	0.09	30.452	2.813	-0.675	0.022	-0.286	0.092	0.797	2.732	2.22	0	37	0	13	0.222222	0.0612643
2019-04-07 19:45 CEST	ETH 1	6.446	0.002	11.479	0.003	17.304	0.026	22.879	0.101	35.141	3.606	-0.694	0.027	-0.205	0.101	5.276	3.498	2.25	0	37.03	0	13	0.202894	0.143105
2019-04-10 02:05 CEST	ETH 1	6.399	0.002	11.474	0.002	17.265	0.026	22.847	0.063	33.743	5.86	-0.679	0.025	-0.226	0.062	3.979	5.692	2.2	0	37.02	0	13	0.218153	0.121887
2019-04-14 11:15 CEST	ETH 1	6.443	0.002	11.467	0.003	17.292	0.033	22.864	0.065	31.2	3.596	-0.691	0.032	-0.198	0.065	1.474	3.489	2.24	0	37.01	0	13	0.205946	0.150178
2019-04-16 02:08 CEST	ETH 1	6.456	0.003	11.47	0.004	17.324	0.028	22.861	0.094	32.4	2.724	-0.676	0.026	-0.206	0.095	2.62	2.649	2.26	0	37.02	0	13	0.221205	0.142095
2019-04-17 11:32 CEST	ETH 1	6.432	0.003	11.483	0.006	17.308	0.02	22.891	0.082	36.227	3.369	-0.68	0.019	-0.202	0.08	6.336	3.276	2.23	0	37.03	0.01	13	0.217136	0.146136
2019-04-19 09:13 CEST	ETH 1	6.326	0.001	11.337	0.003	17.059	0.027	22.538	0.076	32.855	3.443	-0.674	0.027	-0.258	0.073	3.46	3.341	2.12	0	36.88	0	13	0.223239	0.089555
2019-04-20 22:34 CEST	ETH 1	6.461	0.003	11.674	0.003	17.544	0.023	23.255	0.041	33.503	3.644	-0.663	0.022	-0.224	0.04	3.289	3.536	2.26	0	37.23	0	13	0.234429	0.123908
2019-04-22 13:07 CEST	ETH 1	6.427	0.002	11.578	0.003	17.389	0.021	23.076	0.096	32.505	2.586	-0.686	0.019	-0.208	0.094	2.544	2.512	2.22	0	37.13	0	13	0.211032	0.140074
2019-04-24 11:11 CEST	ETH 1	6.425	0.002	11.436	0.002	17.26	0.026	22.78	0.062	32.653	3.221	-0.673	0.024	-0.218	0.061	2.966	3.126	2.23	0	36.98	0	13	0.224256	0.12997
2019-04-26 09:01 CEST	ETH 1	6.447	0.002	11.48	0.002	17.314	0.037	22.925	0.091	35.131	3.464	-0.687	0.038	-0.164	0.091	5.262	3.366	2.25	0	37.03	0	13	0.210015	0.184531
2019-04-26 23:41 CEST	ETH 1	6.451	0.002	11.481	0.004	17.319	0.023	22.838	0.072	34.986	3.132	-0.687	0.024	-0.251	0.074	5.115	3.039	2.25	0	37.03	0	13	0.210015	0.0966276
2019-04-28 05:03 CEST	ETH 1	6.412	0.002	11.442	0.004	17.246	0.022	22.725	0.088	33.384	2.425	-0.681	0.021	-0.284	0.087	3.677	2.357	2.21	0	36.99	0	13	0.216119	0.0632851
2019-04-30 07:53 CEST	ETH 1	6.436	0.001	11.437	0.003	17.277	0.02	22.806	0.126	32.514	3.477	-0.67	0.019	-0.195	0.123	2.816	3.377	2.24	0	36.98	0	13	0.227308	0.153209
2019-05-02 23:39 CEST	ETH 1	6.431	0.003	11.433	0.003	17.261	0.029	22.809	0.156	32.75	3.195	-0.676	0.029	-0.183	0.155	3.06	3.103	2.23	0	36.98	0	13	0.221205	0.165334
2019-05-05 08:54 CEST	ETH 1	6.383	0.001	11.331	0.003	17.108	0.026	22.549	0.058	30.588	2.798	-0.678	0.027	-0.236	0.054	1.209	2.717	2.19	0	36.87	0	13	0.21917	0.111783
2019-05-07 04:25 CEST	ETH 1	6.454	0.003	11.484	0.003	17.329	0.022	22.87	0.098	29.815	2.939	-0.682	0.023	-0.224	0.095	0.086	2.857	2.26	0	37.03	0	12	0.215101	0.123908
2019-05-08 15:28 CEST	ETH 1	6.425	0.002	11.455	0.002	17.277	0.026	22.829	0.108	31.392	4.037	-0.676	0.025	-0.208	0.107	1.703	3.921	2.23	0	37	0	13	0.221205	0.140074
2019-05-10 20:00 CEST	ETH 1	6.331	0.002	11.533	0.004	17.245	0.027	22.993	0.138	34.958	4.129	-0.686	0.027	-0.201	0.139	5.116	4.011	2.12	0	37.08	0	13	0.211032	0.147147
2019-05-11 16:42 CEST	ETH 1	6.403	0.003	11.686	0.003	17.468	0.025	23.292	0.084	35.084	4.049	-0.69	0.025	-0.212	0.084	4.861	3.931	2.19	0	37.24	0	13	0.206963	0.136033
2019-05-12 13:24 CEST	ETH 1	6.371	0.003	11.497	0.002	17.244	0.025	22.931	0.09	37.688	2.346	-0.694	0.023	-0.19	0.09	7.794	2.276	2.17	0	37.05	0	13	0.202894	0.158261
2019-05-13 22:49 CEST	ETH 1	6.392	0.002	11.57	0.002	17.341	0.025	23.043	0.095	36.804	2.629	-0.691	0.026	-0.225	0.092	6.771	2.552	2.19	0	37.12	0	13	0.205946	0.122898
2019-05-19 01:30 CEST	ETH 1	6.372	0.002	11.548	0.004	17.296	0.021	23.009	0.109	37.293	2.542	-0.693	0.021	-0.215	0.107	7.309	2.466	2.17	0	37.1	0	13	0.203912	0.133001
2019-05-21 00:02 CEST	ETH 1	6.357	0.001	11.528	0.003	17.247	0.022	22.975	0.094	34.059	3.752	-0.706	0.022	-0.209	0.092	4.224	3.646	2.15	0	37.08	0	13	0.190687	0.139064
2019-05-22 18:04 CEST	ETH 1	6.407	0.003	11.739	0.004	17.541	0.031	23.411	0.13	36.838	4.788	-0.674	0.03	-0.199	0.126	6.456	4.649	2.2	0	37.29	0	13	0.223239	0.149167
2019-05-24 18:00 CEST	ETH 1	6.393	0.002	11.532	0.003	17.287	0.023	22.99	0.117	32.005	2.541	-0.708	0.026	-0.202	0.115	2.183	2.467	2.19	0	37.08	0	11	0.188653	0.146136
2019-05-30 12:43 CEST	ETH 1	6.382	0.002	11.552	0.002	17.304	0.026	23.005	0.105	34.964	4.429	-0.699	0.027	-0.227	0.102	5.03	4.303	2.18	0	37.1	0	13	0.197808	0.120877
2019-06-02 04:03 CEST	ETH 1	6.222	0.002	11.347	0.002	16.955	0.023	22.609	0.096	32.057	2.496	-0.68	0.024	-0.209	0.092	2.775	2.426	2.01	0	36.89	0	13	0.217136	0.139064
2019-06-05 05:46 CEST	ETH 1	6.361	0.003	11.547	0.004	17.291	0.024	23.047	0.112	30.359	1.407	-0.686	0.023	-0.177	0.113	0.588	1.362	2.15	0	37.1	0	13	0.211032	0.171396
2019-06-07 03:58 CEST	ETH 1	6.397	0.002	11.591	0.004	17.361	0.023	23.092	0.099	32.819	2.933	-0.697	0.024	-0.219	0.099	2.855	2.85	2.19	0	37.14	0	13	0.199843	0.12896
2019-06-08 21:44 CEST	ETH 1	6.349	0.003	11.542	0.004	17.266	0.031	23.023	0.095	31.689	1.937	-0.693	0.029	-0.191	0.095	1.903	1.88	2.14	0	37.09	0	13	0.203912	0.157251
2019-06-10 11:12 CEST	ETH 1	6.403	0.002	11.549	0.003	17.32	0.018	22.972	0.101	28.317	2.56	-0.702	0.021	-0.255	0.099	-1.442	2.486	2.2	0	37.1	0	13	0.194756	0.0925861
2019-06-12 05:19 CEST	ETH 1	6.399	0.002	11.595	0.004	17.375	0.024	23.167	0.094	31.126	2.735	-0.689	0.023	-0.155	0.094	1.2	2.656	2.19	0	37.15	0	13	0.207981	0.193624
2019-06-13 04:32 CEST	ETH 1	6.382	0.001	11.509	0.003	17.253	0.028	22.935	0.098	31.339	3.658	-0.707	0.026	-0.209	0.097	1.593	3.553	2.18	0	37.06	0	13	0.18967	0.139064
2019-06-14 09:49 CEST	ETH 1	6.388	0.002	11.546	0.003	17.306	0.022	22.984	0.054	27.591	3.3	-0.697	0.021	-0.235	0.052	-2.125	3.205	2.18	0	37.1	0	13	0.199843	0.112794
2019-06-16 07:54 CEST	ETH 1	6.376	0.002	11.559	0.002	17.312	0.029	23.049	0.111	29.874	3.496	-0.692	0.029	-0.197	0.107	0.08	3.395	2.17	0	37.11	0	13	0.204929	0.151188
2019-06-18 02:55 CEST	ETH 1	6.362	0.002	11.539	0.003	17.287	0.033	22.94	0.09	27.837	1.388	-0.682	0.034	-0.265	0.088	-1.844	1.347	2.15	0	37.09	0	13	0.215101	0.0824823
2019-06-20 01:47 CEST	ETH 1	6.395	0.002	11.579	0.003	17.351	0.028	22.994	0.081	24.832	1.777	-0.693	0.027	-0.292	0.083	-4.877	1.723	2.19	0	37.13	0	13	0.203912	0.055202
2019-06-22 03:02 CEST	ETH 1	6.34	0.002	11.526	0.003	17.24	0.026	22.922	0.117	29.347	4.443	-0.694	0.026	-0.257	0.118	-0.332	4.315	2.13	0	37.08	0	13	0.202894	0.0905654
2019-06-27 06:23 CEST	ETH 1	6.39	0.002	11.554	0.003	17.326	0.026	22.973	0.103	30.841	2.132	-0.688	0.024	-0.262	0.101	1.013	2.075	2.18	0	37.1	0	13	0.208998	0.0855134
2019-06-29 11:50 CEST	ETH 1	6.204	0.002	11.381	0.004	16.971	0.029	22.659	0.073	26.837	3.099	-0.678	0.027	-0.228	0.074	-2.344	3.013	1.99	0	36.93	0	13	0.21917	0.119866
2019-07-03 07:21 CEST	ETH 1	6.377	0.002	11.657	0.003	17.424	0.021	23.303	0.107	33.259	2.831	-0.678	0.02	-0.143	0.108	3.173	2.742	2.17	0	37.21	0	13	0.21917	0.205749
2019-07-05 05:46 CEST	ETH 1	6.39	0.002	11.536	0.004	17.309	0.025	22.977	0.061	32.857	3.584	-0.687	0.025	-0.223	0.062	3.006	3.478	2.19	0	37.09	0	13	0.210015	0.124918
2019-07-07 00:07 CEST	ETH 1	6.392	0.003	11.515	0.004	17.292	0.024	22.97	0.085	30.465	2.064	-0.686	0.023	-0.188	0.086	0.722	2.001	2.19	0	37.06	0	13	0.211032	0.160282
2019-07-08 14:39 CEST	ETH 1	6.396	0.003	11.595	0.004	17.383	0.029	23.115	0.074	30.205	3.601	-0.678	0.027	-0.205	0.074	0.309	3.494	2.19	0	37.15	0	13	0.21917	0.143105
2019-07-11 03:28 CEST	ETH 1	6.417	0.002	11.671	0.003	17.473	0.026	23.331	0.09	32.534	2.69	-0.685	0.024	-0.144	0.09	2.4	2.615	2.21	0	37.22	0	13	0.21205	0.204738
2019-07-12 19:02 CEST	ETH 1	6.296	0.003	11.398	0.004	17.089	0.02	22.756	0.079	33.2	2.899	-0.673	0.022	-0.166	0.08	3.708	2.818	2.09	0	36.94	0	13	0.224256	0.18251
2019-07-14 08:33 CEST	ETH 1	6.349	0.002	11.549	0.004	17.28	0.017	23.068	0.1	31.868	3.181	-0.686	0.018	-0.159	0.098	2.064	3.088	2.14	0	37.1	0	13	0.211032	0.189583
2019-07-16 02:49 CEST	ETH 1	6.283	0.003	11.547	0.006	17.215	0.02	23.047	0.12	31.173	2.543	-0.68	0.015	-0.175	0.124	1.464	2.474	2.07	0	37.1	0.01	13	0.217136	0.173417
2019-07-18 09:47 CEST	ETH 1	6.365	0.002	11.537	0.004	17.287	0.03	23.035	0.084	30.514	3.438	-0.684	0.031	-0.168	0.087	0.754	3.342	2.16	0	37.09	0	13	0.213067	0.180489
2019-07-20 12:57 CEST	ETH 1	6.376	0.003	11.527	0.003	17.296	0.02	23.004	0.106	27.277	2.265	-0.677	0.02	-0.179	0.105	-2.382	2.2	2.17	0	37.08	0	13	0.220187	0.169375
2019-07-22 15:37 CEST	ETH 1	6.23	0.003	11.409	0.004	17.022	0.026	22.765	0.096	25.519	2.349	-0.682	0.026	-0.179	0.096	-3.706	2.276	2.02	0	36.96	0	13	0.215101	0.169375
2019-07-23 08:15 CEST	ETH 1	6.417	0.002	11.621	0.004	17.427	0.027	23.158	0.118	26.636	2.53	-0.682	0.023	-0.214	0.118	-3.23	2.458	2.21	0	37.17	0	13	0.215101	0.134012
2019-07-25 06:45 CEST	ETH 1	6.394	0.002	11.549	0.004	17.332	0.019	23.042	0.093	28.722	2.448	-0.681	0.018	-0.185	0.093	-1.04	2.38	2.19	0	37.1	0	13	0.216119	0.163313
2019-07-28 06:54 CEST	ETH 1	6.381	0.003	11.646	0.004	17.425	0.022	23.186	0.087	29.862	2.474	-0.671	0.023	-0.236	0.088	-0.106	2.406	2.17	0	37.2	0	13	0.226291	0.111783
2019-07-30 01:05 CEST	ETH 1	6.399	0.002	11.553	0.003	17.338	0.022	23.048	0.073	28.812	2.266	-0.684	0.019	-0.188	0.074	-0.965	2.204	2.19	0	37.1	0	13	0.213067	0.160282
2019-07-31 23:58 CEST	ETH 1	6.403	0.002	11.583	0.003	17.382	0.029	23.106	0.114	27.71	2.072	-0.675	0.028	-0.189	0.112	-2.098	2.013	2.2	0	37.13	0	13	0.222222	0.159271
2019-08-03 06:43 CEST	ETH 1	6.402	0.002	11.533	0.004	17.319	0.022	23.093	0.076	29.883	2.349	-0.687	0.02	-0.104	0.08	0.111	2.28	2.2	0	37.08	0	13	0.210015	0.245154
2019-08-04 20:11 CEST	ETH 1	6.343	0.002	11.484	0.004	17.213	0.032	22.865	0.065	24.545	1.874	-0.682	0.032	-0.229	0.062	-4.915	1.819	2.14	0	37.03	0	13	0.215101	0.118856
2019-04-06 18:54 CEST	ETH 2	-5.54	0.002	-5.175	0.003	-11.433	0.018	-10.524	0.078	-15.578	3.003	-0.667	0.021	-0.203	0.083	0.415	3.052	-9.91	0	19.96	0	13	0.23036	0.145126
2019-04-08 08:35 CEST	ETH 2	-5.554	0.003	-5.111	0.004	-11.397	0.027	-10.395	0.087	-13.505	2.784	-0.679	0.027	-0.202	0.09	2.41	2.828	-9.93	0	20.03	0	13	0.218153	0.146136
2019-04-10 22:59 CEST	ETH 2	-5.552	0.003	-5.225	0.004	-11.519	0.025	-10.628	0.094	-16.867	2.478	-0.691	0.027	-0.206	0.097	-0.782	2.516	-9.92	0	19.91	0	13	0.205946	0.142095
2019-04-13 10:24 CEST	ETH 2	-5.554	0.002	-5.265	0.003	-11.551	0.019	-10.708	0.054	-16.945	3.418	-0.682	0.019	-0.207	0.054	-0.78	3.47	-9.92	0	19.87	0	13	0.215101	0.141084
2019-04-15 13:22 CEST	ETH 2	-5.549	0.002	-5.213	0.003	-11.478	0.015	-10.562	0.069	-15.208	4.015	-0.664	0.015	-0.165	0.071	0.877	4.081	-9.92	0	19.92	0	13	0.233412	0.18352
2019-04-18 04:06 CEST	ETH 2	-5.544	0.002	-5.208	0.004	-11.477	0.012	-10.592	0.1	-17.824	3.302	-0.674	0.014	-0.205	0.103	-1.798	3.355	-9.92	0	19.93	0	13	0.223239	0.143105
2019-04-19 21:41 CEST	ETH 2	-5.576	0.002	-5.17	0.002	-11.474	0.032	-10.523	0.068	-15.287	3.989	-0.674	0.032	-0.211	0.073	0.741	4.054	-9.95	0	19.97	0	13	0.223239	0.137043
2019-04-23 01:33 CEST	ETH 2	-5.556	0.002	-5.163	0.003	-11.436	0.032	-10.475	0.118	-17.728	3.37	-0.665	0.032	-0.177	0.12	-1.776	3.426	-9.93	0	19.97	0	13	0.232394	0.171396
2019-04-25 03:57 CEST	ETH 2	-5.553	0.002	-5.079	0.003	-11.353	0.018	-10.341	0.075	-18.904	2.412	-0.667	0.016	-0.211	0.076	-3.139	2.449	-9.93	0	20.06	0	13	0.23036	0.137043
2019-04-27 03:50 CEST	ETH 2	-5.536	0.002	-5.271	0.003	-11.541	0.025	-10.75	0.072	-19.236	4.51	-0.685	0.023	-0.239	0.074	-3.117	4.585	-9.9	0	19.86	0	13	0.21205	0.108752
2019-05-01 00:48 CEST	ETH 2	-5.505	0.002	-4.919	0.003	-11.145	0.026	-10.025	0.112	-17.491	1.946	-0.664	0.026	-0.213	0.117	-2.07	1.98	-9.88	0	20.22	0	13	0.233412	0.135022
2019-05-03 12:26 CEST	ETH 2	-5.521	0.002	-5.129	0.003	-11.383	0.023	-10.456	0.074	-16.561	3.012	-0.681	0.023	-0.228	0.078	-0.695	3.059	-9.89	0	20.01	0	12	0.216119	0.119866
2019-05-05 21:57 CEST	ETH 2	-5.527	0.002	-4.959	0.003	-11.218	0.031	-10.119	0.075	-18.652	3.838	-0.676	0.031	-0.228	0.079	-3.147	3.898	-9.91	0	20.18	0	13	0.221205	0.119866
2019-05-07 08:35 CEST	ETH 2	-5.466	0.002	-5.032	0.004	-11.23	0.024	-10.25	0.073	-18.136	2.839	-0.679	0.021	-0.213	0.076	-2.545	2.879	-9.84	0	20.11	0	12	0.218153	0.135022
2019-05-09 09:33 CEST	ETH 2	-5.513	0.002	-5.125	0.003	-11.365	0.033	-10.394	0.07	-17.904	3.52	-0.675	0.035	-0.172	0.072	-2.076	3.577	-9.89	0	20.01	0	13	0.222222	0.176448
2019-05-11 00:08 CEST	ETH 2	-5.535	0.002	-4.932	0.005	-11.213	0.021	-10.035	0.09	-13.47	3.773	-0.689	0.019	-0.196	0.094	2.073	3.829	-9.92	0	20.21	0	13	0.207981	0.152199
2019-05-11 20:50 CEST	ETH 2	-5.563	0.001	-4.955	0.003	-11.266	0.02	-10.098	0.109	-17.579	3.767	-0.69	0.019	-0.215	0.112	-2.027	3.829	-9.95	0	20.19	0	13	0.206963	0.133001
2019-05-12 17:33 CEST	ETH 2	-5.538	0.002	-5.042	0.003	-11.331	0.025	-10.276	0.085	-14.199	4.002	-0.697	0.026	-0.219	0.088	1.552	4.069	-9.92	0	20.1	0	13	0.199843	0.12896
2019-05-14 02:58 CEST	ETH 2	-5.601	0.002	-5.06	0.004	-11.423	0.019	-10.254	0.096	-14.339	3.353	-0.707	0.018	-0.162	0.097	1.511	3.406	-9.98	0	20.08	0	13	0.18967	0.186552
2019-05-16 23:25 CEST	ETH 2	-5.589	0.002	-5.034	0.003	-11.366	0.023	-10.27	0.077	-16.575	1.293	-0.686	0.024	-0.229	0.077	-0.823	1.311	-9.97	0	20.11	0	13	0.211032	0.118856
2019-05-19 13:58 CEST	ETH 2	-5.558	0.002	-5.182	0.004	-11.496	0.03	-10.582	0.067	-15.091	3.573	-0.705	0.032	-0.248	0.069	0.944	3.633	-9.93	0	19.95	0	13	0.191705	0.0996588
2019-05-21 12:29 CEST	ETH 2	-5.599	0.002	-5.036	0.002	-11.381	0.024	-10.254	0.076	-15.613	3.258	-0.689	0.022	-0.21	0.078	0.169	3.312	-9.98	0	20.1	0	13	0.207981	0.138053
2019-05-23 10:46 CEST	ETH 2	-5.595	0.003	-4.998	0.003	-11.35	0.025	-10.199	0.097	-15.53	3.513	-0.7	0.025	-0.23	0.098	0.174	3.568	-9.98	0	20.14	0	13	0.196791	0.117846
2019-05-31 13:57 CEST	ETH 2	-5.572	0.002	-5.099	0.003	-11.406	0.031	-10.378	0.13	-10.185	2.269	-0.681	0.031	-0.208	0.132	5.779	2.311	-9.95	0	20.04	0	13	0.216119	0.140074
2019-06-01 03:04 CEST	ETH 2	-5.594	0.002	-5.223	0.002	-11.57	0.021	-10.64	0.078	-13.71	2.357	-0.701	0.022	-0.224	0.078	2.467	2.396	-9.97	0	19.91	0	13	0.195774	0.123908
2019-06-03 13:55 CEST	ETH 2	-5.582	0.002	-5.119	0.004	-11.439	0.022	-10.421	0.073	-4.599	2.909	-0.685	0.022	-0.21	0.074	11.507	2.952	-9.96	0	20.02	0	13	0.21205	0.138053
2019-06-05 22:53 CEST	ETH 2	-5.578	0.001	-5.081	0.003	-11.401	0.021	-10.351	0.099	-7.934	2.615	-0.687	0.02	-0.216	0.103	8.038	2.661	-9.96	0	20.06	0	13	0.210015	0.131991
2019-06-07 16:33 CEST	ETH 2	-5.59	0.002	-5.109	0.003	-11.438	0.027	-10.426	0.087	-10.502	3.03	-0.685	0.028	-0.236	0.091	5.498	3.079	-9.97	0	20.03	0	13	0.21205	0.111783
2019-06-09 10:10 CEST	ETH 2	-5.603	0.002	-5.151	0.003	-11.507	0.021	-10.502	0.125	-14.912	2.55	-0.7	0.023	-0.229	0.13	1.113	2.595	-9.98	0	19.99	0	13	0.196791	0.118856
2019-06-10 23:43 CEST	ETH 2	-5.597	0.003	-5.204	0.004	-11.557	0.021	-10.628	0.116	-14.045	2.584	-0.704	0.019	-0.251	0.121	2.091	2.629	-9.97	0	19.93	0	13	0.192722	0.0966276
2019-06-13 08:49 CEST	ETH 2	-5.596	0.002	-5.17	0.006	-11.522	0.024	-10.551	0.136	-12.877	2.869	-0.703	0.026	-0.241	0.144	3.21	2.917	-9.97	0	19.97	0.01	13	0.193739	0.106731
2019-06-16 20:22 CEST	ETH 2	-5.586	0.003	-5.123	0.003	-11.459	0.019	-10.399	0.091	-11.84	3.188	-0.697	0.019	-0.181	0.092	4.16	3.235	-9.96	0	20.01	0	13	0.199843	0.167354
2019-06-18 15:43 CEST	ETH 2	-5.587	0.003	-5.099	0.004	-11.437	0.025	-10.378	0.117	-8.245	2.211	-0.696	0.025	-0.208	0.123	7.767	2.246	-9.97	0	20.04	0	13	0.20086	0.140074
2019-06-20 15:20 CEST	ETH 2	-5.6	0.002	-5.173	0.005	-11.517	0.022	-10.453	0.125	-10.865	1.909	-0.692	0.025	-0.135	0.128	5.265	1.945	-9.98	0	19.96	0.01	13	0.204929	0.213832
2019-06-25 02:09 CEST	ETH 2	-5.597	0.002	-5.124	0.003	-11.463	0.023	-10.466	0.113	-9.332	2.092	-0.688	0.022	-0.247	0.117	6.723	2.127	-9.97	0	20.01	0	13	0.208998	0.100669
2019-06-26 09:19 CEST	ETH 2	-5.571	0.001	-5.077	0.003	-11.385	0.025	-10.336	0.09	-8.334	2.001	-0.682	0.025	-0.21	0.09	7.614	2.032	-9.95	0	20.06	0	13	0.215101	0.138053
2019-06-27 23:24 CEST	ETH 2	-5.581	0.002	-5.1	0.003	-11.427	0.029	-10.341	0.092	-9.317	2.422	-0.691	0.028	-0.168	0.094	6.674	2.461	-9.96	0	20.04	0	13	0.205946	0.180489
2019-06-30 00:20 CEST	ETH 2	-5.601	0.002	-5.075	0.003	-11.416	0.012	-10.34	0.076	-7.442	3.142	-0.686	0.013	-0.218	0.079	8.55	3.192	-9.98	0	20.06	0	13	0.211032	0.12997
2019-07-04 00:19 CEST	ETH 2	-5.599	0.002	-5.116	0.004	-11.462	0.014	-10.437	0.085	-11.101	3.276	-0.692	0.012	-0.233	0.089	4.912	3.331	-9.98	0	20.02	0	13	0.204929	0.114814
2019-07-05 23:00 CEST	ETH 2	-5.604	0.002	-5.14	0.002	-11.482	0.023	-10.401	0.075	-9.088	2.432	-0.684	0.022	-0.15	0.077	7.009	2.469	-9.98	0	20	0	13	0.213067	0.198676
2019-07-07 12:39 CEST	ETH 2	-5.607	0.002	-5.01	0.004	-11.357	0.025	-10.234	0.1	-14.266	2.154	-0.683	0.025	-0.242	0.103	1.494	2.185	-9.99	0	20.13	0	13	0.214084	0.105721
2019-07-09 11:30 CEST	ETH 2	-5.606	0.003	-5.137	0.003	-11.482	0.021	-10.443	0.09	-13.64	2.272	-0.685	0.022	-0.197	0.092	2.381	2.312	-9.98	0	20	0	13	0.21205	0.151188
2019-07-11 07:39 CEST	ETH 2	-5.576	0.003	-4.972	0.004	-11.288	0.024	-10.09	0.064	-12.53	3.038	-0.683	0.023	-0.172	0.068	3.15	3.088	-9.96	0	20.17	0	13	0.214084	0.176448
2019-07-13 07:35 CEST	ETH 2	-5.563	0.002	-4.951	0.003	-11.258	0.024	-10.096	0.079	-13.215	3.064	-0.686	0.024	-0.221	0.08	2.398	3.116	-9.95	0	20.19	0	13	0.211032	0.126939
2019-07-14 21:05 CEST	ETH 2	-5.569	0.002	-5.038	0.005	-11.355	0.023	-10.267	0.098	-13.694	3.39	-0.692	0.023	-0.218	0.1	2.091	3.442	-9.95	0	20.1	0.01	13	0.204929	0.12997
2019-07-16 15:22 CEST	ETH 2	-5.573	0.002	-5.074	0.003	-11.394	0.021	-10.371	0.082	-12.247	2.901	-0.691	0.021	-0.251	0.084	3.637	2.951	-9.95	0	20.06	0	13	0.205946	0.0966276
2019-07-21 01:24 CEST	ETH 2	-5.59	0.003	-5.088	0.005	-11.405	0.024	-10.356	0.077	-9.747	2.813	-0.672	0.026	-0.208	0.077	6.222	2.855	-9.97	0	20.05	0	13	0.225274	0.140074
2019-07-26 00:14 CEST	ETH 2	-5.608	0.001	-5.106	0.003	-11.437	0.023	-10.375	0.134	-7.289	1.786	-0.668	0.021	-0.19	0.136	8.777	1.817	-9.99	0	20.03	0	13	0.229343	0.158261
2019-07-27 05:51 CEST	ETH 2	-5.592	0.002	-5.158	0.004	-11.485	0.024	-10.425	0.091	-8.381	1.624	-0.682	0.023	-0.138	0.093	7.75	1.653	-9.97	0	19.98	0	13	0.215101	0.210801
2019-07-28 19:21 CEST	ETH 2	-5.556	0.003	-5.093	0.003	-11.38	0.018	-10.38	0.113	-9.609	2.763	-0.677	0.019	-0.222	0.116	6.336	2.808	-9.93	0	20.05	0	13	0.220187	0.125929
2019-07-30 13:44 CEST	ETH 2	-5.614	0.003	-5.187	0.004	-11.547	0.02	-10.59	0.085	-8.874	2.004	-0.692	0.022	-0.246	0.089	7.332	2.033	-9.99	0	19.95	0	13	0.204929	0.10168
2019-08-01 12:27 CEST	ETH 2	-5.614	0.003	-5.089	0.003	-11.439	0.024	-10.332	0.084	-8.739	1.901	-0.681	0.024	-0.183	0.086	7.274	1.929	-9.99	0	20.05	0	13	0.216119	0.165334
2019-08-03 19:14 CEST	ETH 2	-5.603	0.003	-5.183	0.004	-11.522	0.015	-10.518	0.079	-8.31	2.473	-0.683	0.016	-0.181	0.084	7.886	2.512	-9.98	0	19.95	0	13	0.214084	0.167354
2019-04-05 09:39 CEST	ETH 3	6.144	0.002	11.856	0.004	17.786	0.018	23.713	0.105	33.066	4.513	-0.278	0.02	-0.136	0.099	2.847	4.383	1.91	0	37.41	0	13	0.626067	0.212821
2019-04-07 07:20 CEST	ETH 3	6.127	0.002	11.758	0.004	17.677	0.015	23.549	0.049	33.231	3.942	-0.271	0.018	-0.102	0.05	3.217	3.824	1.9	0	37.31	0	13	0.633188	0.247174
2019-04-09 05:24 CEST	ETH 3	6.088	0.001	11.796	0.005	17.663	0.022	23.623	0.112	33.966	4.369	-0.282	0.023	-0.105	0.114	3.898	4.242	1.85	0	37.35	0.01	13	0.621998	0.244143
2019-04-11 11:25 CEST	ETH 3	6.064	0.002	11.815	0.003	17.653	0.031	23.713	0.082	33.481	3.283	-0.286	0.03	-0.056	0.078	3.414	3.185	1.83	0	37.37	0	13	0.617929	0.293652
2019-04-13 22:50 CEST	ETH 3	6.125	0.002	11.81	0.002	17.712	0.029	23.657	0.073	33.95	3.022	-0.285	0.029	-0.099	0.073	3.815	2.931	1.89	0	37.37	0	13	0.618946	0.250206
2019-04-16 23:06 CEST	ETH 3	6.116	0.002	11.85	0.003	17.75	0.031	23.767	0.127	37.467	3.133	-0.279	0.029	-0.071	0.127	7.16	3.039	1.88	0	37.41	0	13	0.62505	0.278496
2019-04-18 16:38 CEST	ETH 3	6.136	0.002	11.846	0.002	17.767	0.026	23.743	0.151	31.45	2.487	-0.279	0.027	-0.086	0.148	1.306	2.414	1.9	0	37.4	0	13	0.62505	0.263341
2019-04-22 00:39 CEST	ETH 3	6.14	0.003	11.835	0.003	17.758	0.031	23.73	0.104	33.936	2.867	-0.28	0.032	-0.078	0.103	3.737	2.783	1.91	0	37.39	0	13	0.624032	0.271424
2019-04-23 14:06 CEST	ETH 3	6.129	0.001	11.83	0.004	17.739	0.035	23.677	0.094	33.159	2.832	-0.284	0.035	-0.121	0.093	3.002	2.749	1.9	0	37.39	0	13	0.619963	0.227977
2019-04-25 20:35 CEST	ETH 3	6.132	0.002	11.856	0.004	17.773	0.017	23.81	0.099	32.509	2.367	-0.278	0.018	-0.042	0.099	2.318	2.303	1.9	0	37.41	0	13	0.626067	0.307797
2019-04-27 16:26 CEST	ETH 3	6.083	0.002	11.786	0.004	17.65	0.026	23.682	0.075	35.246	3.908	-0.28	0.024	-0.027	0.076	5.165	3.796	1.85	0	37.34	0	13	0.624032	0.322953
2019-04-29 06:11 CEST	ETH 3	6.111	0.002	11.723	0.003	17.602	0.017	23.494	0.064	33.131	2.663	-0.295	0.016	-0.087	0.066	3.205	2.589	1.88	0	37.28	0	13	0.608774	0.26233
2019-05-01 13:27 CEST	ETH 3	6.109	0.002	11.736	0.003	17.618	0.026	23.494	0.103	32.878	3.468	-0.29	0.025	-0.113	0.102	2.935	3.367	1.88	0	37.29	0	13	0.61386	0.23606
2019-05-04 07:00 CEST	ETH 3	6.064	0.002	11.826	0.003	17.674	0.029	23.747	0.069	33.014	3.603	-0.277	0.028	-0.044	0.069	2.939	3.493	1.83	0	37.38	0	13	0.627084	0.305777
2019-05-06 11:04 CEST	ETH 3	6.113	0.003	11.819	0.003	17.709	0.02	23.748	0.091	32.3	2.802	-0.286	0.02	-0.029	0.09	2.207	2.718	1.88	0	37.38	0	13	0.617929	0.320932
2019-05-08 02:03 CEST	ETH 3	6.15	0.003	11.818	0.004	17.756	0.024	23.701	0.108	33.035	3.905	-0.276	0.026	-0.073	0.11	2.883	3.787	1.92	0	37.38	0	13	0.628101	0.276475
2019-05-11 04:18 CEST	ETH 3	6.061	0.002	11.928	0.003	17.745	0.024	24.007	0.114	38.407	2.986	-0.303	0.024	0.007	0.112	7.978	2.9	1.82	0	37.49	0	13	0.600636	0.357306
2019-05-12 00:59 CEST	ETH 3	6.062	0.002	11.981	0.002	17.808	0.027	24.066	0.077	38.126	3.252	-0.293	0.026	-0.039	0.075	7.601	3.156	1.82	0	37.54	0	13	0.610808	0.310828
2019-05-12 21:43 CEST	ETH 3	6.079	0.002	11.933	0.003	17.783	0.018	23.96	0.07	37.893	3.102	-0.288	0.018	-0.048	0.07	7.451	3.014	1.84	0	37.49	0	13	0.615894	0.301735
2019-05-14 07:08 CEST	ETH 3	6.053	0.002	11.926	0.002	17.739	0.025	23.956	0.113	37.54	3.473	-0.298	0.025	-0.038	0.108	7.15	3.372	1.81	0	37.49	0	13	0.605722	0.311839
2019-05-18 08:54 CEST	ETH 3	6.118	0.002	11.98	0.003	17.864	0.034	24.045	0.078	38.16	3.391	-0.294	0.033	-0.057	0.076	7.577	3.29	1.88	0	37.54	0	13	0.609791	0.292642
2019-05-20 02:26 CEST	ETH 3	6.06	0.002	11.874	0.003	17.678	0.018	23.881	0.082	39.676	4.101	-0.315	0.019	-0.009	0.08	9.318	3.98	1.82	0	37.43	0	13	0.588429	0.34114
2019-05-22 05:30 CEST	ETH 3	5.992	0.002	11.837	0.002	17.58	0.023	23.83	0.074	36.877	3.78	-0.305	0.023	0.017	0.075	6.746	3.67	1.75	0	37.39	0	13	0.598601	0.36741
2019-05-24 04:44 CEST	ETH 3	6.101	0.002	11.926	0.003	17.788	0.018	23.93	0.087	37.659	2.594	-0.3	0.017	-0.063	0.086	7.213	2.52	1.86	0	37.49	0	13	0.603688	0.286579
2019-05-30 00:14 CEST	ETH 3	6.112	0.002	11.96	0.003	17.844	0.019	24.011	0.092	34.755	2.869	-0.288	0.02	-0.051	0.091	4.318	2.784	1.87	0	37.52	0	13	0.615894	0.298704
2019-06-01 15:31 CEST	ETH 3	6.095	0.002	11.94	0.002	17.805	0.018	23.902	0.099	28.684	2.261	-0.29	0.018	-0.117	0.095	-1.519	2.194	1.86	0	37.5	0	13	0.61386	0.232019
2019-06-04 12:20 CEST	ETH 3	6.108	0.003	11.958	0.003	17.836	0.034	24.006	0.072	30.567	3.077	-0.292	0.034	-0.052	0.071	0.259	2.984	1.87	0	37.52	0	13	0.611826	0.297693
2019-06-06 11:22 CEST	ETH 3	6.113	0.002	12.007	0.003	17.876	0.024	24.125	0.106	34.139	3.157	-0.304	0.023	-0.033	0.107	3.626	3.06	1.87	0	37.57	0	13	0.599619	0.316891
2019-06-08 09:12 CEST	ETH 3	6.108	0.002	11.997	0.004	17.875	0.026	24.087	0.093	33.83	3.262	-0.289	0.025	-0.049	0.094	3.353	3.165	1.87	0	37.56	0	13	0.614877	0.300725
2019-06-09 22:43 CEST	ETH 3	6.114	0.002	11.985	0.003	17.858	0.02	24.072	0.102	31.401	3.744	-0.301	0.021	-0.041	0.103	1.011	3.635	1.87	0	37.55	0	13	0.60267	0.308808
2019-06-11 12:40 CEST	ETH 3	6.117	0.002	12.027	0.003	17.899	0.024	24.159	0.086	29.453	3.301	-0.305	0.024	-0.039	0.086	-0.964	3.203	1.88	0	37.59	0	13	0.598601	0.310828
2019-06-13 21:20 CEST	ETH 3	6.11	0.002	11.981	0.003	17.848	0.023	24.069	0.087	30.298	3.213	-0.303	0.022	-0.036	0.086	-0.048	3.115	1.87	0	37.54	0	13	0.600636	0.31386
2019-06-15 19:25 CEST	ETH 3	6.091	0.003	11.978	0.004	17.835	0.031	24.058	0.106	27.833	1.586	-0.293	0.032	-0.041	0.107	-2.414	1.54	1.85	0	37.54	0	13	0.610808	0.308808
2019-06-17 08:52 CEST	ETH 3	6.08	0.002	12.004	0.004	17.857	0.029	24.105	0.079	29.442	2.853	-0.286	0.03	-0.045	0.081	-0.89	2.773	1.84	0	37.57	0	13	0.617929	0.304766
2019-06-19 08:16 CEST	ETH 3	6.092	0.003	11.97	0.003	17.827	0.026	24.017	0.094	28.126	2.651	-0.295	0.025	-0.065	0.092	-2.116	2.573	1.85	0	37.53	0	13	0.608774	0.284559
2019-06-21 04:40 CEST	ETH 3	6.103	0.002	11.991	0.002	17.852	0.026	24.058	0.09	30.882	3.335	-0.302	0.027	-0.066	0.09	0.507	3.239	1.86	0	37.55	0	13	0.601653	0.283548
2019-06-25 15:10 CEST	ETH 3	6.108	0.002	11.993	0.003	17.858	0.027	23.988	0.086	23.639	1.786	-0.302	0.025	-0.137	0.086	-6.53	1.736	1.87	0	37.55	0	13	0.601653	0.211811
2019-06-28 23:23 CEST	ETH 3	6.09	0.002	11.953	0.004	17.82	0.023	23.994	0.095	32.376	1.943	-0.283	0.022	-0.053	0.092	2.045	1.888	1.85	0	37.51	0	13	0.620981	0.296683
2019-07-02 01:29 CEST	ETH 3	6.094	0.003	12.005	0.004	17.892	0.024	24.084	0.099	34.646	1.987	-0.267	0.022	-0.068	0.102	4.142	1.931	1.85	0	37.57	0	13	0.637257	0.281527
2019-07-04 12:46 CEST	ETH 3	6.101	0.002	11.958	0.004	17.828	0.028	24.063	0.094	31.968	2.317	-0.292	0.025	0.003	0.092	1.628	2.247	1.86	0	37.52	0	13	0.611826	0.353264
2019-07-06 11:35 CEST	ETH 3	6.075	0.002	11.964	0.005	17.814	0.023	24.115	0.085	28.833	3.104	-0.283	0.021	0.042	0.088	-1.399	3.01	1.83	0	37.53	0.01	13	0.620981	0.392669
2019-07-08 01:11 CEST	ETH 3	6.091	0.003	11.967	0.005	17.811	0.023	24.069	0.083	33.326	1.931	-0.306	0.022	-0.009	0.085	2.938	1.872	1.85	0	37.53	0	13	0.597584	0.34114
2019-07-10 05:47 CEST	ETH 3	6.112	0.003	11.969	0.004	17.837	0.036	24.056	0.093	33.747	3.76	-0.304	0.036	-0.025	0.097	3.32	3.645	1.87	0	37.53	0	13	0.599619	0.324974
2019-07-12 01:36 CEST	ETH 3	6.094	0.002	11.972	0.003	17.837	0.024	24.073	0.045	33.558	3.761	-0.287	0.023	-0.014	0.043	3.152	3.65	1.85	0	37.53	0	13	0.616912	0.336088
2019-07-13 20:06 CEST	ETH 3	6.086	0.003	11.976	0.004	17.826	0.02	24.064	0.059	33.315	2.419	-0.296	0.017	-0.03	0.057	2.916	2.346	1.85	0	37.54	0	13	0.607757	0.319922
2019-07-15 09:35 CEST	ETH 3	6.067	0.002	11.921	0.004	17.766	0.02	23.964	0.094	32.839	2.617	-0.281	0.02	-0.019	0.094	2.582	2.542	1.83	0	37.48	0	13	0.623015	0.331036
2019-07-17 08:27 CEST	ETH 3	6.066	0.003	11.936	0.002	17.776	0.029	23.962	0.119	36.627	3.89	-0.285	0.029	-0.052	0.117	6.229	3.777	1.83	0	37.5	0	13	0.618946	0.297693
2019-07-20 00:24 CEST	ETH 3	6.068	0.003	11.878	0.003	17.728	0.034	23.849	0.134	31.61	3.652	-0.278	0.033	-0.046	0.134	1.471	3.543	1.83	0	37.44	0	13	0.626067	0.303756
2019-07-21 13:51 CEST	ETH 3	6.06	0.002	11.901	0.005	17.721	0.021	23.887	0.1	28.071	2.034	-0.298	0.02	-0.056	0.101	-2	1.97	1.82	0	37.46	0	13	0.605722	0.293652
2019-07-23 04:05 CEST	ETH 3	6.13	0.002	11.996	0.004	17.903	0.03	24.091	0.087	31.497	3.424	-0.284	0.032	-0.044	0.086	1.066	3.324	1.89	0	37.56	0	13	0.619963	0.305777
2019-07-24 13:46 CEST	ETH 3	6.099	0.002	11.951	0.004	17.826	0.013	23.936	0.124	24.357	2.42	-0.285	0.015	-0.107	0.126	-5.744	2.346	1.86	0	37.51	0	13	0.618946	0.242123
2019-07-26 12:44 CEST	ETH 3	6.091	0.002	11.938	0.004	17.806	0.029	23.936	0.111	25.186	3.101	-0.283	0.028	-0.081	0.112	-4.906	3.008	1.85	0	37.5	0	13	0.620981	0.268392
2019-07-27 18:25 CEST	ETH 3	6.083	0.002	11.947	0.003	17.813	0.019	23.98	0.094	26.458	2.652	-0.276	0.019	-0.055	0.095	-3.68	2.575	1.84	0	37.51	0	13	0.628101	0.294662
2019-07-29 07:54 CEST	ETH 3	6.097	0.002	11.963	0.005	17.849	0.022	24.018	0.099	30.828	3.214	-0.27	0.024	-0.049	0.102	0.517	3.122	1.86	0	37.52	0.01	13	0.634205	0.300725
2019-07-31 06:51 CEST	ETH 3	6.095	0.003	11.939	0.004	17.815	0.028	24.044	0.093	30.264	3.413	-0.279	0.026	0.024	0.092	0.018	3.317	1.86	0	37.5	0	13	0.62505	0.374482
2019-08-02 05:24 CEST	ETH 3	6.099	0.003	11.958	0.004	17.821	0.024	24.047	0.079	30.349	3.195	-0.296	0.022	-0.011	0.076	0.059	3.096	1.86	0	37.52	0	13	0.607757	0.339119
2019-08-03 02:33 CEST	ETH 3	6.122	0.002	11.995	0.004	17.897	0.022	24.147	0.089	31.194	2.321	-0.28	0.021	0.013	0.089	0.784	2.256	1.88	0	37.56	0	13	0.624032	0.363368
2019-08-04 07:41 CEST	ETH 3	6.087	0.002	11.993	0.004	17.849	0.024	24.096	0.094	30.684	2.921	-0.29	0.021	-0.033	0.094	0.329	2.837	1.85	0	37.56	0	13	0.61386	0.316891

## Sheet: slopes
ID	Sample	δ47 (raw)	∆47 (raw)		δ48 (raw)	∆48 (raw)	∆48 (raw, norm)
2019-04-05 17:59 CEST	HG	-26.016	-0.855		-15.154	-0.302	0.0319311		∆47	Intercept	Error	Slope	Error	Distinguishable from 0?
2019-04-08 21:02 CEST	HG	-1.675	-0.866		-1.936	-0.319	0.0149311		HG	-0.866663	0.00142	3.59525e-05	8.5405e-05	no
2019-04-09 17:47 CEST	HG	17.024	-0.849		22.506	-0.364	-0.0300689		25G	0.0161921	0.00161254	6.55578e-05	6.34428e-05	no
2019-04-10 18:50 CEST	HG	-25.064	-0.87		-14.535	-0.319	0.0149311		ETH 1 & 2	-0.685049	0.00098808	1.31375e-05	6.67369e-05	no
2019-04-12 13:37 CEST	HG	-2.429	-0.858		-3.289	-0.307	0.0269311
2019-04-15 17:48 CEST	HG	18.786	-0.849		26.106	-0.346	-0.0120689		∆48	Intercept	Error	Slope	Error	Distinguishable from 0?
2019-04-16 18:58 CEST	HG	-26.806	-0.861		-15.539	-0.295	0.0389311		HG	-0.342226	0.00397496	-0.000627806	0.000250925	yes
2019-04-17 19:48 CEST	HG	-1.368	-0.866		-1.352	-0.359	-0.0250689		25G	-0.00829449	0.0100401	-0.000243476	0.00026341	no
2019-04-23 18:32 CEST	HG	18.481	-0.856		25.361	-0.364	-0.0300689		merged gas	–	–	-0.000328242	0.000157128	yes
2019-04-24 19:39 CEST	HG	-25.76	-0.85		-14.895	-0.33	0.00393111		ETH 1 & 2	-0.208073	0.00336703	2.55546e-07	0.000185646	no
2019-04-25 16:25 CEST	HG	-1.973	-0.863		-2.546	-0.358	-0.0240689
2019-04-26 19:32 CEST	HG	17.054	-0.868		22.545	-0.381	-0.0470689		Note that the equilbrium gases are not used directly to calcualte the ∆ CDES values of the carbonte samples.
2019-04-29 19:15 CEST	HG	-21.661	-0.881		-12.634	-0.29	0.0439311
2019-04-30 20:33 CEST	HG	-1.206	-0.866		-1.18	-0.34	-0.00606889
2019-05-02 19:23 CEST	HG	18.782	-0.856		26.124	-0.319	0.0149311
2019-05-03 18:06 CEST	HG	-21.599	-0.844		-13.153	-0.314	0.0199311
2019-05-06 19:51 CEST	HG	-1.412	-0.861		-1.457	-0.372	-0.0380689
2019-05-08 19:57 CEST	HG	18.968	-0.856		26.339	-0.374	-0.0400689
2019-05-10 15:49 CEST	HG	-21.707	-0.879		-12.952	-0.346	-0.0120689
2019-05-14 15:25 CEST	HG	-2.02	-0.874		-2.525	-0.33	0.00393111
2019-05-15 20:10 CEST	HG	17.258	-0.885		23.3	-0.337	-0.00306889
2019-05-16 19:16 CEST	HG	-25.435	-0.876		-14.648	-0.336	-0.00206889
2019-05-20 19:53 CEST	HG	-1.374	-0.87		-1.233	-0.325	0.00893111
2019-05-22 22:07 CEST	HG	18.47	-0.881		25.533	-0.343	-0.00906889
2019-05-28 22:28 CEST	HG	-16.053	-0.855		-9.821	-0.384	-0.0500689
2019-05-29 15:55 CEST	HG	-2.15	-0.864		-2.711	-0.282	0.0519311
2019-05-31 18:45 CEST	HG	18.733	-0.882		26.129	-0.421	-0.0870689
2019-06-03 18:05 CEST	HG	-15.912	-0.869		-9.412	-0.294	0.0399311
2019-06-05 18:44 CEST	HG	-2.249	-0.864		-2.989	-0.329	0.00493111
2019-06-07 20:44 CEST	HG	17.597	-0.875		23.765	-0.361	-0.0270689
2019-06-12 19:54 CEST	HG	-18.332	-0.851		-11.606	-0.364	-0.0300689
2019-06-14 18:29 CEST	HG	-1.431	-0.873		-1.311	-0.317	0.0169311
2019-06-17 18:34 CEST	HG	-25.132	-0.879		-14.134	-0.304	0.0299311
2019-06-19 21:37 CEST	HG	17.142	-0.879		23.032	-0.348	-0.0140689
2019-06-21 18:42 CEST	HG	-1.45	-0.874		-1.369	-0.336	-0.00206889
2019-06-24 17:51 CEST	HG	-18.005	-0.865		-10.672	-0.364	-0.0300689
2019-06-26 17:56 CEST	HG	16.482	-0.866		22.042	-0.374	-0.0400689
2019-06-28 19:15 CEST	HG	-1.946	-0.849		-2.467	-0.366	-0.0320689
2019-07-02 18:46 CEST	HG	-21.982	-0.872		-12.948	-0.361	-0.0270689
2019-07-03 20:10 CEST	HG	16.883	-0.865		22.234	-0.32	0.0139311
2019-07-05 14:36 CEST	HG	-2.1	-0.877		-2.653	-0.317	0.0169311
2019-07-08 18:49 CEST	HG	-21.554	-0.874		-12.484	-0.354	-0.0200689
2019-07-08 22:59 CEST	HG	-21.762	-0.876		-12.905	-0.404	-0.0700689
2019-07-10 18:46 CEST	HG	18.213	-0.869		24.833	-0.364	-0.0300689
2019-07-12 14:21 CEST	HG	-1.963	-0.87		-2.413	-0.363	-0.0290689
2019-07-15 18:31 CEST	HG	-21.593	-0.88		-12.522	-0.363	-0.0290689
2019-07-18 18:44 CEST	HG	18.547	-0.862		25.632	-0.323	0.0109311
2019-07-19 16:03 CEST	HG	-2.183	-0.874		-2.71	-0.401	-0.0670689
2019-07-22 19:47 CEST	HG	-21.575	-0.872		-12.503	-0.342	-0.00806889
2019-07-23 21:04 CEST	HG	18.24	-0.848		25.14	-0.361	-0.0270689
2019-07-25 20:03 CEST	HG	-1.182	-0.869		-0.926	-0.332	0.00193111
2019-07-29 20:54 CEST	HG	-21.783	-0.867		-12.62	-0.341	-0.00706889
2019-07-31 19:46 CEST	HG	18.705	-0.874		25.927	-0.387	-0.0530689
2019-08-01 16:55 CEST	HG	-2.19	-0.871		-2.835	-0.317	0.0169311
2019-04-05 22:07 CEST	25G	-28.565	0.025		13.567	-0.066	-0.066
2019-04-08 16:53 CEST	25G	-27.239	0.027		16.066	-0.018	-0.018
2019-04-09 21:56 CEST	25G	-27.588	0.016		15.43	0	0
2019-04-10 14:41 CEST	25G	-2.976	0.017		-6.158	0.025	0.025
2019-04-12 17:48 CEST	25G	33.518	0.03		66.452	-0.097	-0.097
2019-04-18 20:47 CEST	25G	-27.11	0.005		16.333	-0.066	-0.066
2019-04-23 22:41 CEST	25G	-3.583	0.032		-7.026	0.001	0.001
2019-04-29 23:25 CEST	25G	32.275	0.023		64.2	-0.031	-0.031
2019-04-30 03:39 CEST	25G	32.669	0.019		64.78	-0.092	-0.092
2019-05-02 15:08 CEST	25G	-28.076	0.022		14.57	-0.005	-0.005
2019-05-07 17:11 CEST	25G	-3.437	0.024		-6.837	-0.012	-0.012
2019-05-13 18:41 CEST	25G	-28.559	0.006		13.754	-0.025	-0.025
2019-05-17 20:26 CEST	25G	-2.931	0.003		-5.912	-0.036	-0.036
2019-05-21 21:12 CEST	25G	33.344	0.018		66.599	0.075	0.075
2019-05-23 20:26 CEST	25G	-28.342	0.001		14.137	0.004	0.004
2019-05-29 02:51 CEST	25G	-3.304	0.021		-6.67	-0.002	-0.002
2019-05-31 22:54 CEST	25G	32.686	0.012		65.165	-0.009	-0.009
2019-06-04 17:15 CEST	25G	-28.195	0.01		14.425	-0.024	-0.024
2019-06-06 15:31 CEST	25G	33.241	0.009		66.9	0.055	0.055
2019-06-11 16:49 CEST	25G	-3.461	0.013		-6.833	0.002	0.002
2019-06-14 22:39 CEST	25G	-27.498	-0.004		15.796	-0.002	-0.002
2019-06-18 19:51 CEST	25G	33.452	0.012		66.567	-0.119	-0.119
2019-06-21 22:53 CEST	25G	-3.368	0.004		-6.735	0.017	0.017
2019-06-25 20:23 CEST	25G	-27.92	0.022		14.934	-0.048	-0.048
2019-06-27 19:11 CEST	25G	34.22	0.011		68.079	-0.06	-0.06
2019-07-01 17:10 CEST	25G	-27.758	0.028		15.285	0.013	0.013
2019-07-04 17:19 CEST	25G	-3.148	0.01		-6.326	0.014	0.014
2019-07-09 21:29 CEST	25G	33.618	0.03		67.107	0.099	0.099
2019-07-11 17:17 CEST	25G	-27.686	-0.002		15.445	-0.019	-0.019
2019-07-16 20:01 CEST	25G	-3.311	0.029		-6.726	-0.014	-0.014
2019-07-18 22:53 CEST	25G	34.069	0.022		67.896	0.027	0.027
2019-07-24 18:16 CEST	25G	-27.74	0.02		15.266	-0.032	-0.032
2019-07-26 17:20 CEST	25G	-3.339	0.02		-6.669	-0.015	-0.015
2019-07-30 18:20 CEST	25G	34.016	0.008		67.678	-0.094	-0.094
2019-08-02 18:10 CEST	25G	-27.953	0.012		15.077	0.034	0.034
2019-08-05 18:56 CEST	25G	-3.722	0.024		-7.365	0.01	0.01
2019-04-06 06:26 CEST	ETH 1	17.273	-0.675		22.746	-0.286	-0.0862212
2019-04-07 19:45 CEST	ETH 1	17.304	-0.694		22.879	-0.205	-0.00522122
2019-04-10 02:05 CEST	ETH 1	17.265	-0.679		22.847	-0.226	-0.0262212
2019-04-14 11:15 CEST	ETH 1	17.292	-0.691		22.864	-0.198	0.00177878
2019-04-16 02:08 CEST	ETH 1	17.324	-0.676		22.861	-0.206	-0.00622122
2019-04-17 11:32 CEST	ETH 1	17.308	-0.68		22.891	-0.202	-0.00222122
2019-04-19 09:13 CEST	ETH 1	17.059	-0.674		22.538	-0.258	-0.0582212
2019-04-20 22:34 CEST	ETH 1	17.544	-0.663		23.255	-0.224	-0.0242212
2019-04-22 13:07 CEST	ETH 1	17.389	-0.686		23.076	-0.208	-0.00822122
2019-04-24 11:11 CEST	ETH 1	17.26	-0.673		22.78	-0.218	-0.0182212
2019-04-26 09:01 CEST	ETH 1	17.314	-0.687		22.925	-0.164	0.0357788
2019-04-26 23:41 CEST	ETH 1	17.319	-0.687		22.838	-0.251	-0.0512212
2019-04-28 05:03 CEST	ETH 1	17.246	-0.681		22.725	-0.284	-0.0842212
2019-04-30 07:53 CEST	ETH 1	17.277	-0.67		22.806	-0.195	0.00477878
2019-05-02 23:39 CEST	ETH 1	17.261	-0.676		22.809	-0.183	0.0167788
2019-05-05 08:54 CEST	ETH 1	17.108	-0.678		22.549	-0.236	-0.0362212
2019-05-07 04:25 CEST	ETH 1	17.329	-0.682		22.87	-0.224	-0.0242212
2019-05-08 15:28 CEST	ETH 1	17.277	-0.676		22.829	-0.208	-0.00822122
2019-05-10 20:00 CEST	ETH 1	17.245	-0.686		22.993	-0.201	-0.00122122
2019-05-11 16:42 CEST	ETH 1	17.468	-0.69		23.292	-0.212	-0.0122212
2019-05-12 13:24 CEST	ETH 1	17.244	-0.694		22.931	-0.19	0.00977878
2019-05-13 22:49 CEST	ETH 1	17.341	-0.691		23.043	-0.225	-0.0252212
2019-05-19 01:30 CEST	ETH 1	17.296	-0.693		23.009	-0.215	-0.0152212
2019-05-21 00:02 CEST	ETH 1	17.247	-0.706		22.975	-0.209	-0.00922122
2019-05-22 18:04 CEST	ETH 1	17.541	-0.674		23.411	-0.199	0.000778775
2019-05-24 18:00 CEST	ETH 1	17.287	-0.708		22.99	-0.202	-0.00222122
2019-05-30 12:43 CEST	ETH 1	17.304	-0.699		23.005	-0.227	-0.0272212
2019-06-02 04:03 CEST	ETH 1	16.955	-0.68		22.609	-0.209	-0.00922122
2019-06-05 05:46 CEST	ETH 1	17.291	-0.686		23.047	-0.177	0.0227788
2019-06-07 03:58 CEST	ETH 1	17.361	-0.697		23.092	-0.219	-0.0192212
2019-06-08 21:44 CEST	ETH 1	17.266	-0.693		23.023	-0.191	0.00877878
2019-06-10 11:12 CEST	ETH 1	17.32	-0.702		22.972	-0.255	-0.0552212
2019-06-12 05:19 CEST	ETH 1	17.375	-0.689		23.167	-0.155	0.0447788
2019-06-13 04:32 CEST	ETH 1	17.253	-0.707		22.935	-0.209	-0.00922122
2019-06-14 09:49 CEST	ETH 1	17.306	-0.697		22.984	-0.235	-0.0352212
2019-06-16 07:54 CEST	ETH 1	17.312	-0.692		23.049	-0.197	0.00277878
2019-06-18 02:55 CEST	ETH 1	17.287	-0.682		22.94	-0.265	-0.0652212
2019-06-20 01:47 CEST	ETH 1	17.351	-0.693		22.994	-0.292	-0.0922212
2019-06-22 03:02 CEST	ETH 1	17.24	-0.694		22.922	-0.257	-0.0572212
2019-06-27 06:23 CEST	ETH 1	17.326	-0.688		22.973	-0.262	-0.0622212
2019-06-29 11:50 CEST	ETH 1	16.971	-0.678		22.659	-0.228	-0.0282212
2019-07-03 07:21 CEST	ETH 1	17.424	-0.678		23.303	-0.143	0.0567788
2019-07-05 05:46 CEST	ETH 1	17.309	-0.687		22.977	-0.223	-0.0232212
2019-07-07 00:07 CEST	ETH 1	17.292	-0.686		22.97	-0.188	0.0117788
2019-07-08 14:39 CEST	ETH 1	17.383	-0.678		23.115	-0.205	-0.00522122
2019-07-11 03:28 CEST	ETH 1	17.473	-0.685		23.331	-0.144	0.0557788
2019-07-12 19:02 CEST	ETH 1	17.089	-0.673		22.756	-0.166	0.0337788
2019-07-14 08:33 CEST	ETH 1	17.28	-0.686		23.068	-0.159	0.0407788
2019-07-16 02:49 CEST	ETH 1	17.215	-0.68		23.047	-0.175	0.0247788
2019-07-18 09:47 CEST	ETH 1	17.287	-0.684		23.035	-0.168	0.0317788
2019-07-20 12:57 CEST	ETH 1	17.296	-0.677		23.004	-0.179	0.0207788
2019-07-22 15:37 CEST	ETH 1	17.022	-0.682		22.765	-0.179	0.0207788
2019-07-23 08:15 CEST	ETH 1	17.427	-0.682		23.158	-0.214	-0.0142212
2019-07-25 06:45 CEST	ETH 1	17.332	-0.681		23.042	-0.185	0.0147788
2019-07-28 06:54 CEST	ETH 1	17.425	-0.671		23.186	-0.236	-0.0362212
2019-07-30 01:05 CEST	ETH 1	17.338	-0.684		23.048	-0.188	0.0117788
2019-07-31 23:58 CEST	ETH 1	17.382	-0.675		23.106	-0.189	0.0107788
2019-08-03 06:43 CEST	ETH 1	17.319	-0.687		23.093	-0.104	0.0957788
2019-08-04 20:11 CEST	ETH 1	17.213	-0.682		22.865	-0.229	-0.0292212
2019-04-06 18:54 CEST	ETH 2	-11.433	-0.667		-10.524	-0.203	-0.00322122
2019-04-08 08:35 CEST	ETH 2	-11.397	-0.679		-10.395	-0.202	-0.00222122
2019-04-10 22:59 CEST	ETH 2	-11.519	-0.691		-10.628	-0.206	-0.00622122
2019-04-13 10:24 CEST	ETH 2	-11.551	-0.682		-10.708	-0.207	-0.00722122
2019-04-15 13:22 CEST	ETH 2	-11.478	-0.664		-10.562	-0.165	0.0347788
2019-04-18 04:06 CEST	ETH 2	-11.477	-0.674		-10.592	-0.205	-0.00522122
2019-04-19 21:41 CEST	ETH 2	-11.474	-0.674		-10.523	-0.211	-0.0112212
2019-04-23 01:33 CEST	ETH 2	-11.436	-0.665		-10.475	-0.177	0.0227788
2019-04-25 03:57 CEST	ETH 2	-11.353	-0.667		-10.341	-0.211	-0.0112212
2019-04-27 03:50 CEST	ETH 2	-11.541	-0.685		-10.75	-0.239	-0.0392212
2019-05-01 00:48 CEST	ETH 2	-11.145	-0.664		-10.025	-0.213	-0.0132212
2019-05-03 12:26 CEST	ETH 2	-11.383	-0.681		-10.456	-0.228	-0.0282212
2019-05-05 21:57 CEST	ETH 2	-11.218	-0.676		-10.119	-0.228	-0.0282212
2019-05-07 08:35 CEST	ETH 2	-11.23	-0.679		-10.25	-0.213	-0.0132212
2019-05-09 09:33 CEST	ETH 2	-11.365	-0.675		-10.394	-0.172	0.0277788
2019-05-11 00:08 CEST	ETH 2	-11.213	-0.689		-10.035	-0.196	0.00377878
2019-05-11 20:50 CEST	ETH 2	-11.266	-0.69		-10.098	-0.215	-0.0152212
2019-05-12 17:33 CEST	ETH 2	-11.331	-0.697		-10.276	-0.219	-0.0192212
2019-05-14 02:58 CEST	ETH 2	-11.423	-0.707		-10.254	-0.162	0.0377788
2019-05-16 23:25 CEST	ETH 2	-11.366	-0.686		-10.27	-0.229	-0.0292212
2019-05-19 13:58 CEST	ETH 2	-11.496	-0.705		-10.582	-0.248	-0.0482212
2019-05-21 12:29 CEST	ETH 2	-11.381	-0.689		-10.254	-0.21	-0.0102212
2019-05-23 10:46 CEST	ETH 2	-11.35	-0.7		-10.199	-0.23	-0.0302212
2019-05-31 13:57 CEST	ETH 2	-11.406	-0.681		-10.378	-0.208	-0.00822122
2019-06-01 03:04 CEST	ETH 2	-11.57	-0.701		-10.64	-0.224	-0.0242212
2019-06-03 13:55 CEST	ETH 2	-11.439	-0.685		-10.421	-0.21	-0.0102212
2019-06-05 22:53 CEST	ETH 2	-11.401	-0.687		-10.351	-0.216	-0.0162212
2019-06-07 16:33 CEST	ETH 2	-11.438	-0.685		-10.426	-0.236	-0.0362212
2019-06-09 10:10 CEST	ETH 2	-11.507	-0.7		-10.502	-0.229	-0.0292212
2019-06-10 23:43 CEST	ETH 2	-11.557	-0.704		-10.628	-0.251	-0.0512212
2019-06-13 08:49 CEST	ETH 2	-11.522	-0.703		-10.551	-0.241	-0.0412212
2019-06-16 20:22 CEST	ETH 2	-11.459	-0.697		-10.399	-0.181	0.0187788
2019-06-18 15:43 CEST	ETH 2	-11.437	-0.696		-10.378	-0.208	-0.00822122
2019-06-20 15:20 CEST	ETH 2	-11.517	-0.692		-10.453	-0.135	0.0647788
2019-06-25 02:09 CEST	ETH 2	-11.463	-0.688		-10.466	-0.247	-0.0472212
2019-06-26 09:19 CEST	ETH 2	-11.385	-0.682		-10.336	-0.21	-0.0102212
2019-06-27 23:24 CEST	ETH 2	-11.427	-0.691		-10.341	-0.168	0.0317788
2019-06-30 00:20 CEST	ETH 2	-11.416	-0.686		-10.34	-0.218	-0.0182212
2019-07-04 00:19 CEST	ETH 2	-11.462	-0.692		-10.437	-0.233	-0.0332212
2019-07-05 23:00 CEST	ETH 2	-11.482	-0.684		-10.401	-0.15	0.0497788
2019-07-07 12:39 CEST	ETH 2	-11.357	-0.683		-10.234	-0.242	-0.0422212
2019-07-09 11:30 CEST	ETH 2	-11.482	-0.685		-10.443	-0.197	0.00277878
2019-07-11 07:39 CEST	ETH 2	-11.288	-0.683		-10.09	-0.172	0.0277788
2019-07-13 07:35 CEST	ETH 2	-11.258	-0.686		-10.096	-0.221	-0.0212212
2019-07-14 21:05 CEST	ETH 2	-11.355	-0.692		-10.267	-0.218	-0.0182212
2019-07-16 15:22 CEST	ETH 2	-11.394	-0.691		-10.371	-0.251	-0.0512212
2019-07-21 01:24 CEST	ETH 2	-11.405	-0.672		-10.356	-0.208	-0.00822122
2019-07-26 00:14 CEST	ETH 2	-11.437	-0.668		-10.375	-0.19	0.00977878
2019-07-27 05:51 CEST	ETH 2	-11.485	-0.682		-10.425	-0.138	0.0617788
2019-07-28 19:21 CEST	ETH 2	-11.38	-0.677		-10.38	-0.222	-0.0222212
2019-07-30 13:44 CEST	ETH 2	-11.547	-0.692		-10.59	-0.246	-0.0462212
2019-08-01 12:27 CEST	ETH 2	-11.439	-0.681		-10.332	-0.183	0.0167788
2019-08-03 19:14 CEST	ETH 2	-11.522	-0.683		-10.518	-0.181	0.0187788

## Sheet: ETF
	ETF based on ETH1, ETH2, and ETH3 to convert raw values of samples to "CDES90,uc"
	∆47	Intercept	Intended		Slope:	1.01724
	ETH 1 & 2	-0.685049	0.212		Intercept:	0.90886
	ETH 3	-0.288879	0.615
	∆48	Intercept	Intended		Slope:	1.01038
	ETH 1 & 2	-0.208073	0.14		Intercept:	0.350233
	ETH 3	-0.0507069	0.299
	Long-term "intended" values
		∆47 (CDES90)	∆48 (CDES90)
	ETH 1	0.212	0.14
	ETH 2	0.212	0.14
	ETH 3	0.615	0.299

## Sheet: samples
ID	Sample	δ45 (raw)	δ45 (raw) SD	δ46 (raw)	δ46 (raw) SD	δ47 (raw)	δ47 (raw) SD	δ48 (raw)	δ48 (raw) SD	δ49 (raw)	δ49 (raw) SD	∆47 (raw)	∆47 (raw) SD	∆48 (raw)	∆48 (raw) SD	∆49 (raw)	∆49 (raw) SD	δ13C VPDB (CO2)	δ13C VPDB (CO2) SD	δ18O VSMOW (CO2)	δ18O VSMOW (CO2) SD	Acquisitions	∆47 (CDES90,uc)	∆48 (CDES90,uc)
2019-04-07 23:54 CEST	PC1_2005	2.838	0.002	8.757	0.002	11.287	0.015	17.341	0.113	25.766	4.081	-0.272	0.017	-0.245	0.112	5.3	3.998	-1.5	0	34.24	0	13	0.63217	0.10269
2019-04-13 14:33 CEST	PC1_2005	2.782	0.002	8.663	0.004	11.132	0.018	17.154	0.064	20.868	2.31	-0.276	0.018	-0.242	0.064	0.744	2.263	-1.55	0	34.14	0	13	0.628101	0.105721
2019-04-16 10:31 CEST	PC1_2005	2.804	0.003	8.662	0.003	11.171	0.027	17.158	0.091	23.36	2.901	-0.259	0.028	-0.236	0.092	3.165	2.844	-1.53	0	34.14	0	13	0.645394	0.111783
2019-05-20 10:46 CEST	PC1_2005	2.673	0.002	8.699	0.004	11.037	0.031	17.292	0.077	25.363	3.427	-0.292	0.032	-0.177	0.077	5.196	3.363	-1.67	0	34.18	0	13	0.611826	0.171396
2019-06-01 19:41 CEST	PC1_2005	2.756	0.002	8.761	0.004	11.181	0.018	17.375	0.07	20.212	2.404	-0.296	0.017	-0.22	0.069	-0.062	2.359	-1.59	0	34.25	0	13	0.607757	0.127949
2019-06-04 21:26 CEST	PC1_2005	2.755	0.003	8.778	0.004	11.212	0.021	17.358	0.066	19.264	3.302	-0.281	0.021	-0.271	0.065	-1.025	3.236	-1.59	0	34.26	0	13	0.623015	0.07642
2019-07-05 01:37 CEST	PC1_2005	2.748	0.002	8.788	0.004	11.226	0.034	17.471	0.078	22.726	2.828	-0.271	0.032	-0.18	0.08	2.355	2.77	-1.59	0	34.27	0	13	0.633188	0.168365
2019-07-12 23:13 CEST	PC1_2005	2.686	0.002	8.348	0.003	10.72	0.013	16.563	0.141	21.747	3.444	-0.278	0.016	-0.199	0.137	2.322	3.376	-1.64	0	33.82	0	13	0.626067	0.149167
2019-07-26 08:33 CEST	PC1_2005	2.721	0.003	8.563	0.003	10.979	0.035	16.973	0.068	19.56	1.37	-0.267	0.033	-0.222	0.066	-0.279	1.344	-1.62	0	34.04	0	13	0.637257	0.125929
2019-07-29 03:45 CEST	PC1_2005	2.736	0.003	8.513	0.003	10.933	0.022	16.947	0.074	20.423	3.129	-0.279	0.022	-0.148	0.072	0.649	3.064	-1.6	0	33.99	0	13	0.62505	0.200697
2019-04-05 13:48 CEST	Mv143-b	4.212	0.002	13.679	0.003	17.617	0.025	27.402	0.102	35.431	2.942	-0.23	0.025	-0.14	0.103	3.646	2.853	-0.21	0	39.29	0	13	0.674894	0.20878
2019-04-14 07:07 CEST	Mv143-b	4.161	0.002	13.668	0.004	17.563	0.029	27.392	0.076	35.356	3.245	-0.221	0.027	-0.128	0.073	3.649	3.142	-0.27	0	39.28	0	13	0.68405	0.220905
2019-04-20 05:58 CEST	Mv143-b	4.161	0.002	13.638	0.002	17.531	0.026	27.372	0.088	36.105	3.223	-0.223	0.025	-0.088	0.086	4.435	3.122	-0.27	0	39.25	0	13	0.682015	0.26132
2019-04-23 09:53 CEST	Mv143-b	4.118	0.002	13.645	0.003	17.488	0.029	27.337	0.13	37.906	3.231	-0.227	0.03	-0.137	0.127	6.213	3.135	-0.31	0	39.26	0	13	0.677946	0.211811
2019-05-04 15:35 CEST	Mv143-b	4.118	0.002	13.615	0.004	17.455	0.019	27.312	0.104	33.622	3.878	-0.231	0.02	-0.101	0.101	2.118	3.757	-0.31	0	39.22	0	13	0.673877	0.248185
2019-05-24 08:53 CEST	Mv143-b	4.131	0.002	13.745	0.004	17.593	0.024	27.596	0.087	37.874	3.629	-0.234	0.023	-0.081	0.086	5.973	3.517	-0.3	0	39.36	0	13	0.670826	0.268392
2019-06-05 01:36 CEST	Mv143-b	4.137	0.001	13.75	0.003	17.598	0.02	27.604	0.077	30.742	2.545	-0.241	0.018	-0.083	0.074	-0.957	2.465	-0.3	0	39.36	0	13	0.663705	0.266372
2019-07-03 11:33 CEST	Mv143-b	4.149	0.002	13.704	0.003	17.583	0.033	27.509	0.093	34.578	2.82	-0.223	0.03	-0.084	0.088	2.839	2.728	-0.28	0	39.32	0	13	0.682015	0.265361
2019-07-06 15:46 CEST	Mv143-b	4.114	0.003	13.688	0.004	17.529	0.024	27.446	0.114	29.067	2.006	-0.225	0.026	-0.115	0.112	-2.436	1.942	-0.32	0	39.3	0	13	0.679981	0.234039
2019-04-07 11:28 CEST	66-4.65	4.57	0.002	12.288	0.003	16.561	0.024	24.572	0.116	34.386	4.34	-0.287	0.023	-0.15	0.113	4.961	4.213	0.22	0	37.86	0	13	0.616912	0.198676
2019-04-22 17:14 CEST	66-4.65	4.554	0.002	12.408	0.003	16.671	0.022	24.838	0.104	30.189	3.075	-0.279	0.02	-0.13	0.104	0.667	2.985	0.2	0	37.98	0	13	0.62505	0.218884
2019-04-28 00:50 CEST	66-4.65	4.498	0.002	12.292	0.003	16.482	0.025	24.619	0.107	32.985	4.064	-0.293	0.025	-0.112	0.108	3.67	3.946	0.14	0	37.87	0	13	0.610808	0.237071
2019-05-22 13:51 CEST	66-4.65	4.492	0.002	12.402	0.003	16.576	0.025	24.891	0.083	35.691	4.154	-0.303	0.024	-0.065	0.083	6.089	4.036	0.13	0	37.98	0	13	0.600636	0.284559
2019-05-24 13:00 CEST	66-4.65	4.54	0.002	12.474	0.003	16.691	0.021	25.049	0.079	33.617	3.617	-0.308	0.02	-0.053	0.077	3.884	3.513	0.18	0	38.05	0	13	0.59555	0.296683
2019-06-01 11:22 CEST	66-4.65	4.499	0.002	12.365	0.004	16.534	0.029	24.752	0.073	32.063	3.99	-0.314	0.029	-0.127	0.072	2.63	3.873	0.14	0	37.94	0	13	0.589446	0.221915
2019-06-03 22:22 CEST	66-4.65	4.514	0.002	12.394	0.003	16.595	0.024	24.842	0.102	31.012	2.185	-0.298	0.024	-0.098	0.1	1.536	2.127	0.15	0	37.97	0	13	0.605722	0.251216
2019-06-06 07:15 CEST	66-4.65	4.532	0.003	12.438	0.003	16.657	0.018	24.938	0.087	33.238	2.81	-0.297	0.019	-0.09	0.084	3.595	2.728	0.17	0	38.02	0	13	0.606739	0.259299
2019-07-06 19:56 CEST	66-4.65	4.511	0.002	12.416	0.004	16.628	0.02	24.871	0.092	28.272	1.83	-0.285	0.019	-0.112	0.089	-1.164	1.778	0.15	0	37.99	0	13	0.618946	0.237071
2019-05-13 10:09 CEST	MSK 2b	10.934	0.003	-4.686	0.004	6.383	0.019	-9.375	0.093	9.105	4.305	-0.235	0.022	-0.025	0.097	6.735	4.295	7.62	0	20.43	0	13	0.669808	0.324974
2019-05-19 05:39 CEST	MSK 2b	10.921	0.003	-4.757	0.003	6.304	0.026	-9.551	0.115	6.718	3.878	-0.228	0.026	-0.06	0.119	4.51	3.867	7.61	0	20.35	0	13	0.676929	0.28961
2019-05-19 22:16 CEST	MSK 2b	10.902	0.003	-4.936	0.004	6.094	0.019	-9.947	0.083	7.612	3.718	-0.242	0.019	-0.101	0.085	5.776	3.715	7.6	0	20.17	0	13	0.662688	0.248185
2019-05-24 00:34 CEST	MSK 2b	10.963	0.002	-4.847	0.003	6.246	0.031	-9.748	0.071	6.103	3.771	-0.241	0.031	-0.077	0.072	4.031	3.763	7.66	0	20.26	0	13	0.663705	0.272434
2019-06-09 06:00 CEST	MSK 2b	10.921	0.001	-4.799	0.003	6.261	0.024	-9.703	0.123	5.509	4.044	-0.231	0.023	-0.129	0.129	3.386	4.034	7.61	0	20.31	0	13	0.673877	0.219894
2019-06-11 03:50 CEST	MSK 2b	10.974	0.003	-4.864	0.003	6.242	0.025	-9.831	0.086	4.889	1.94	-0.239	0.025	-0.127	0.089	2.84	1.936	7.67	0	20.24	0	13	0.665739	0.221915
2019-06-15 11:06 CEST	MSK 2b	10.956	0.002	-4.847	0.002	6.232	0.028	-9.729	0.074	6.499	3.096	-0.248	0.029	-0.059	0.076	4.431	3.088	7.65	0	20.26	0	13	0.656584	0.290621
2019-07-17 04:18 CEST	MSK 2b	10.905	0.002	-4.545	0.003	6.499	0.017	-9.13	0.113	5.42	4.086	-0.228	0.016	-0.06	0.114	2.811	4.076	7.59	0	20.57	0	13	0.676929	0.28961
2019-07-25 10:55 CEST	MHD1	-27.485	0.002	3.042	0.003	-25.778	0.019	6.022	0.107	-13.001	1.713	-0.336	0.02	-0.071	0.108	10.735	1.754	-33.6	0	28.45	0	13	0.567067	0.278496
2019-07-27 10:02 CEST	MHD1	-27.424	0.002	2.867	0.002	-25.901	0.025	5.63	0.096	-14.294	2	-0.354	0.027	-0.112	0.097	9.69	2.049	-33.53	0	28.27	0	13	0.548757	0.237071
2019-07-30 05:16 CEST	MHD1	-27.492	0.003	2.983	0.004	-25.864	0.031	5.935	0.068	-16.599	1.803	-0.358	0.033	-0.039	0.07	7.176	1.848	-33.61	0	28.38	0	13	0.544688	0.310828
2019-08-01 04:08 CEST	MHD1	-27.514	0.004	2.948	0.004	-25.912	0.02	5.826	0.121	-16.672	3.199	-0.35	0.019	-0.079	0.125	7.193	3.277	-33.63	0	28.35	0	13	0.552825	0.270413
2019-08-03 10:53 CEST	MHD1	-27.352	0.003	2.976	0.003	-25.726	0.027	5.868	0.078	-18.367	3.257	-0.359	0.027	-0.093	0.08	5.223	3.331	-33.46	0	28.38	0	13	0.54367	0.256268
2019-08-04 11:50 CEST	MHD1	-27.247	0.002	3.018	0.004	-25.573	0.018	5.986	0.063	-15.368	2.889	-0.354	0.018	-0.059	0.063	8.095	2.959	-33.35	0	28.42	0	13	0.548757	0.290621
2019-04-15 03:49 CEST	JR	-2.912	0.002	13.359	0.004	9.902	0.027	26.663	0.085	26.395	3.801	-0.184	0.028	-0.226	0.085	3.091	3.715	-7.79	0	38.98	0	13	0.721688	0.121887
2019-04-20 01:50 CEST	JR	-2.929	0.003	13.259	0.003	9.794	0.023	26.535	0.06	29.325	2.684	-0.176	0.024	-0.154	0.058	6.168	2.626	-7.81	0	38.87	0	13	0.729826	0.194635
2019-04-23 05:43 CEST	JR	-2.909	0.002	13.394	0.002	9.947	0.02	26.802	0.11	30.237	3.208	-0.177	0.021	-0.162	0.107	6.773	3.132	-7.79	0	39.01	0	13	0.728808	0.186552
2019-04-27 20:38 CEST	JR	-2.87	0.002	13.186	0.005	9.769	0.017	26.389	0.074	28.998	3.068	-0.192	0.016	-0.153	0.071	5.926	2.996	-7.74	0	38.8	0	13	0.71355	0.195645
2019-05-04 11:18 CEST	JR	-2.835	0.002	13.098	0.003	9.735	0.015	26.276	0.078	25.918	2.583	-0.175	0.016	-0.088	0.08	3.051	2.521	-7.7	0	38.71	0	13	0.730843	0.26132
2019-06-09 01:52 CEST	JR	-2.94	0.002	13.274	0.003	9.766	0.025	26.542	0.117	27.213	2.385	-0.207	0.024	-0.178	0.116	4.085	2.332	-7.82	0	38.89	0	13	0.698291	0.170385
2019-06-10 15:23 CEST	JR	-2.929	0.003	13.334	0.003	9.851	0.023	26.647	0.082	23.621	2.562	-0.192	0.021	-0.193	0.081	0.447	2.506	-7.81	0	38.95	0	13	0.71355	0.15523
2019-07-15 05:24 CEST	JR	-3.155	0.002	13.392	0.002	9.687	0.019	26.841	0.126	26.714	3.873	-0.178	0.019	-0.12	0.122	3.599	3.786	-8.05	0	39.01	0	13	0.727791	0.228988
2019-07-27 22:35 CEST	JR	-2.967	0.002	13.398	0.005	9.893	0.031	26.866	0.085	23.132	1.967	-0.175	0.027	-0.107	0.089	-0.116	1.919	-7.85	0	39.02	0.01	13	0.730843	0.242123
2019-07-28 11:02 CEST	JR	-3.162	0.002	13.417	0.004	9.704	0.021	26.801	0.126	23.246	2.779	-0.178	0.02	-0.208	0.126	0.168	2.718	-8.06	0	39.04	0	13	0.727791	0.140074
2019-07-27 01:41 CEST	DHC2-8	2.054	0.002	-2.438	0.003	-0.609	0.025	-4.977	0.095	4.128	1.925	-0.326	0.026	-0.108	0.097	6.752	1.932	-1.92	0	22.75	0	13	0.577239	0.241112
2019-07-29 16:42 CEST	DHC2-8	2.055	0.003	-2.449	0.004	-0.613	0.029	-5.009	0.099	1.374	2.618	-0.321	0.032	-0.119	0.105	4.011	2.626	-1.92	0	22.74	0	13	0.582325	0.229998
2019-07-31 10:58 CEST	DHC2-8	2.063	0.003	-2.468	0.004	-0.628	0.023	-5.043	0.08	2.12	2.471	-0.325	0.022	-0.114	0.079	4.789	2.472	-1.91	0	22.72	0	13	0.578257	0.23505
2019-08-02 01:14 CEST	DHC2-8	2.061	0.003	-2.476	0.004	-0.644	0.026	-5.018	0.092	1.172	2.982	-0.33	0.025	-0.072	0.097	3.857	2.991	-1.91	0	22.71	0	13	0.57317	0.277486
2019-08-03 23:23 CEST	DHC2-8	2.037	0.003	-2.424	0.003	-0.607	0.03	-4.942	0.106	1.274	2.363	-0.319	0.03	-0.1	0.111	3.883	2.369	-1.94	0	22.77	0	13	0.58436	0.249195
2019-04-21 20:30 CEST	SPA121-02	11.14	0.002	0.613	0.004	11.85	0.027	1.169	0.116	16.654	2.259	-0.249	0.026	-0.057	0.118	3.518	2.229	7.65	0	25.86	0	13	0.655567	0.292642
2019-05-07 21:36 CEST	SPA121-02	11.142	0.002	0.734	0.004	11.962	0.026	1.375	0.118	15.348	2.597	-0.26	0.026	-0.094	0.119	1.988	2.563	7.65	0	25.99	0	13	0.644377	0.255257
2019-06-09 18:33 CEST	SPA121-02	11.11	0.002	0.673	0.004	11.853	0.025	1.27	0.081	14.888	2.029	-0.273	0.024	-0.075	0.086	1.69	2.002	7.61	0	25.92	0	13	0.631153	0.274455

## Sheet: correction (ETH)
ID	Sample	∆47 (CDES90,uc)	∆48 (CDES90,uc)	Relative time	residual ∆47	residual ∆48	drift correction ∆47	∆47 (CDES90) -final	drift correction ∆48	∆48 (CDES90) -final
2019-04-06 06:26 CEST	ETH 1	0.222222	0.0612643	1.26736	0.010222	-0.0787357	0.00650236	0.21572	-0.0345889	0.0958532
2019-04-07 19:45 CEST	ETH 1	0.202894	0.143105	2.82222	-0.00910563	0.00310517	0.00743931	0.195455	-0.0304497	0.173555
2019-04-10 02:05 CEST	ETH 1	0.218153	0.121887	5.08611	0.00615299	-0.0181128	0.0084397	0.209713	-0.0250663	0.146953
2019-04-14 11:15 CEST	ETH 1	0.205946	0.150178	9.46806	-0.00605391	0.0101778	0.00929987	0.196646	-0.016617	0.166795
2019-04-16 02:08 CEST	ETH 1	0.221205	0.142095	11.0882	0.00920471	0.00209479	0.00930665	0.211898	-0.0140876	0.156182
2019-04-17 11:32 CEST	ETH 1	0.217136	0.146136	12.4799	0.00513575	0.00613631	0.00919602	0.20794	-0.0121476	0.158284													shot noise
2019-04-19 09:13 CEST	ETH 1	0.223239	0.089555	14.3833	0.0112392	-0.050445	0.00888728	0.214352	-0.0098196	0.0993746													0	-0.007	0.007
2019-04-20 22:34 CEST	ETH 1	0.234429	0.123908	15.9396	0.0224289	-0.0160921	0.00851351	0.225915	-0.00817716	0.132085													130	-0.007	0.007
2019-04-22 13:07 CEST	ETH 1	0.211032	0.140074	17.5458	-0.000967702	7.40244e-05	0.00802636	0.203006	-0.00671019	0.146784
2019-04-24 11:11 CEST	ETH 1	0.224256	0.12997	19.4653	0.0122564	-0.0100298	0.00732605	0.21693	-0.00523812	0.135208
2019-04-26 09:01 CEST	ETH 1	0.210015	0.184531	21.375	-0.00198494	0.0445308	0.00652033	0.203495	-0.00405121	0.188582
2019-04-26 23:41 CEST	ETH 1	0.210015	0.0966276	21.9861	-0.00198494	-0.0433724	0.00624265	0.203772	-0.00372557	0.100353
2019-04-28 05:03 CEST	ETH 1	0.216119	0.0632851	23.2097	0.00411851	-0.0767149	0.00566144	0.210457	-0.00314732	0.0664324
2019-04-30 07:53 CEST	ETH 1	0.227308	0.153209	25.3278	0.0153082	0.013209	0.00458764	0.222721	-0.0023622	0.155571
2019-05-02 23:39 CEST	ETH 1	0.221205	0.165334	27.9847	0.00920471	0.0253336	0.00315	0.218055	-0.00172024	0.167054
2019-05-05 08:54 CEST	ETH 1	0.21917	0.111783	30.3701	0.00717023	-0.0282166	0.00180616	0.217364	-0.00142141	0.113205
2019-05-07 04:25 CEST	ETH 1	0.215101	0.123908	32.1833	0.00310126	-0.0160921	0.000769667	0.214332	-0.00134251	0.12525
2019-05-08 15:28 CEST	ETH 1	0.221205	0.140074	33.6437	0.00920471	7.40244e-05	-6.55939e-05	0.22127	-0.00135853	0.141433
2019-05-10 20:00 CEST	ETH 1	0.211032	0.147147	35.8326	-0.000967702	0.00714669	-0.00130462	0.212337	-0.00149471	0.148641
2019-05-11 16:42 CEST	ETH 1	0.206963	0.136033	36.6951	-0.00503667	-0.0039675	-0.00178511	0.208748	-0.00157991	0.137612
2019-05-12 13:24 CEST	ETH 1	0.202894	0.158261	37.5576	-0.00910563	0.0182609	-0.0022596	0.205154	-0.00168037	0.159941													shot noise
2019-05-13 22:49 CEST	ETH 1	0.205946	0.122898	38.95	-0.00605391	-0.0171025	-0.00301035	0.208956	-0.0018706	0.124768													0	-0.023	0.023
2019-05-19 01:30 CEST	ETH 1	0.203912	0.133001	44.0618	-0.00808839	-0.00699864	-0.00554612	0.209458	-0.00276824	0.13577													130	-0.023	0.023
2019-05-21 00:02 CEST	ETH 1	0.190687	0.139064	46.0007	-0.0213125	-0.000936357	-0.00639239	0.19708	-0.00314779	0.142211
2019-05-22 18:04 CEST	ETH 1	0.223239	0.149167	47.7521	0.0112392	0.00916745	-0.00709152	0.230331	-0.00348977	0.152657
2019-05-24 18:00 CEST	ETH 1	0.188653	0.146136	49.7493	-0.023347	0.00613631	-0.00780645	0.196459	-0.00386565	0.150002
2019-05-30 12:43 CEST	ETH 1	0.197808	0.120877	55.5292	-0.0141918	-0.0191232	-0.00932722	0.207135	-0.00475203	0.125629
2019-06-02 04:03 CEST	ETH 1	0.217136	0.139064	58.1681	0.00513575	-0.000936357	-0.00972933	0.226865	-0.00500266	0.144066
2019-06-05 05:46 CEST	ETH 1	0.211032	0.171396	61.2396	-0.000967702	0.0313958	-0.00995564	0.220988	-0.00513353	0.176529
2019-06-07 03:58 CEST	ETH 1	0.199843	0.12896	63.1646	-0.0121574	-0.0110402	-0.00996364	0.209806	-0.00511604	0.134076
2019-06-08 21:44 CEST	ETH 1	0.203912	0.157251	64.9049	-0.00808839	0.0172505	-0.00988248	0.213794	-0.00502885	0.162279
2019-06-10 11:12 CEST	ETH 1	0.194756	0.0925861	66.466	-0.0172436	-0.0474139	-0.00973911	0.204496	-0.00489027	0.0974764
2019-06-12 05:19 CEST	ETH 1	0.207981	0.193624	68.2208	-0.00401943	0.0536242	-0.00949976	0.21748	-0.00466399	0.198288
2019-06-13 04:32 CEST	ETH 1	0.18967	0.139064	69.1882	-0.0223298	-0.000936357	-0.00933321	0.199003	-0.00450667	0.14357
2019-06-14 09:49 CEST	ETH 1	0.199843	0.112794	70.4083	-0.0121574	-0.0272063	-0.00908891	0.208932	-0.00427475	0.117068
2019-06-16 07:54 CEST	ETH 1	0.204929	0.151188	72.3285	-0.00707115	0.0111882	-0.00862962	0.213558	-0.00383348	0.155022
2019-06-18 02:55 CEST	ETH 1	0.215101	0.0824823	74.1208	0.00310126	-0.0575177	-0.00812208	0.223223	-0.0033371	0.0858194
2019-06-20 01:47 CEST	ETH 1	0.203912	0.055202	76.0736	-0.00808839	-0.084798	-0.00748807	0.2114	-0.00270396	0.057906
2019-06-22 03:02 CEST	ETH 1	0.202894	0.0905654	78.1257	-0.00910563	-0.0494346	-0.00673817	0.209633	-0.0019366	0.092502
2019-06-27 06:23 CEST	ETH 1	0.208998	0.0855134	83.2653	-0.00300218	-0.0544866	-0.00454671	0.213545	0.000420743	0.0850927
2019-06-29 11:50 CEST	ETH 1	0.21917	0.119866	85.4924	0.00717023	-0.0201336	-0.00349168	0.222662	0.00161946	0.118247
2019-07-03 07:21 CEST	ETH 1	0.21917	0.205749	89.3056	0.00717023	0.0657488	-0.00160277	0.220773	0.00388361	0.201865
2019-07-05 05:46 CEST	ETH 1	0.210015	0.124918	91.2396	-0.00198494	-0.0150817	-0.00063067	0.210646	0.00511786	0.1198
2019-07-07 00:07 CEST	ETH 1	0.211032	0.160282	93.0042	-0.000967702	0.0202816	0.000248941	0.210783	0.00628392	0.153998
2019-07-08 14:39 CEST	ETH 1	0.21917	0.143105	94.6097	0.00717023	0.00310517	0.00103337	0.218137	0.00737111	0.135734
2019-07-11 03:28 CEST	ETH 1	0.21205	0.204738	97.1437	4.95399e-05	0.0647384	0.00221799	0.209832	0.00912141	0.195617
2019-07-12 19:02 CEST	ETH 1	0.224256	0.18251	98.7924	0.0122564	0.04251	0.00293818	0.221318	0.0102713	0.172239
2019-07-14 08:33 CEST	ETH 1	0.211032	0.189583	100.356	-0.000967702	0.0495827	0.00357257	0.20746	0.0113607	0.178222
2019-07-16 02:49 CEST	ETH 1	0.217136	0.173417	102.117	0.00513575	0.0334166	0.00421831	0.212917	0.0125773	0.160839
2019-07-18 09:47 CEST	ETH 1	0.213067	0.180489	104.407	0.00106678	0.0404893	0.00492551	0.208141	0.0141241	0.166365
2019-07-20 12:57 CEST	ETH 1	0.220187	0.169375	106.539	0.00818747	0.0293751	0.00542179	0.214766	0.0155059	0.153869
2019-07-22 15:37 CEST	ETH 1	0.215101	0.169375	108.65	0.00310126	0.0293751	0.00573055	0.209371	0.0167954	0.15258
2019-07-23 08:15 CEST	ETH 1	0.215101	0.134012	109.343	0.00310126	-0.00598826	0.00578737	0.209314	0.0171976	0.116814
2019-07-25 06:45 CEST	ETH 1	0.216119	0.163313	111.281	0.00411851	0.0233128	0.00581659	0.210302	0.0182554	0.145057
2019-07-28 06:54 CEST	ETH 1	0.226291	0.111783	114.287	0.0142909	-0.0282166	0.00543772	0.220853	0.019664	0.0921194
2019-07-30 01:05 CEST	ETH 1	0.213067	0.160282	116.044	0.00106678	0.0202816	0.00494508	0.208122	0.0203287	0.139953
2019-07-31 23:58 CEST	ETH 1	0.222222	0.159271	117.998	0.010222	0.0192713	0.00413379	0.218088	0.0209046	0.138367
2019-08-03 06:43 CEST	ETH 1	0.210015	0.245154	120.279	-0.00198494	0.105154	0.00279891	0.207216	0.0213287	0.223825
2019-08-04 20:11 CEST	ETH 1	0.215101	0.118856	121.84	0.00310126	-0.021144	0.00162251	0.213479	0.0214448	0.0974112
2019-04-06 18:54 CEST	ETH 2	0.23036	0.145126	1.78681	0.0183599	0.00512593	0.00683916	0.223521	-0.0331646	0.178291
2019-04-08 08:35 CEST	ETH 2	0.218153	0.146136	3.35694	0.00615299	0.00613631	0.00771327	0.21044	-0.029111	0.175247
2019-04-10 22:59 CEST	ETH 2	0.205946	0.142095	5.95694	-0.00605391	0.00209479	0.00871777	0.197228	-0.023188	0.165283
2019-04-13 10:24 CEST	ETH 2	0.215101	0.141084	8.43264	0.00310126	0.00108441	0.0092129	0.205888	-0.0183945	0.159479
2019-04-15 13:22 CEST	ETH 2	0.233412	0.18352	10.5562	0.0214116	0.0435204	0.00932113	0.22409	-0.0148851	0.198406
2019-04-18 04:06 CEST	ETH 2	0.223239	0.143105	13.1701	0.0112392	0.00310517	0.00910415	0.214135	-0.0112611	0.154366
2019-04-19 21:41 CEST	ETH 2	0.223239	0.137043	14.9028	0.0112392	-0.00295712	0.00877399	0.214465	-0.00924621	0.146289
2019-04-23 01:33 CEST	ETH 2	0.232394	0.171396	18.0639	0.0203944	0.0313958	0.00784928	0.224545	-0.00628376	0.17768
2019-04-25 03:57 CEST	ETH 2	0.23036	0.137043	20.1639	0.0183599	-0.00295712	0.00704289	0.223317	-0.00477322	0.141816
2019-04-27 03:50 CEST	ETH 2	0.21205	0.108752	22.159	4.95399e-05	-0.0312478	0.0061625	0.205887	-0.00363797	0.11239	-0.0186565	1.83055e-06
2019-05-01 00:48 CEST	ETH 2	0.233412	0.135022	26.0326	0.0214116	-0.00497788	0.00421455	0.229197	-0.0021569	0.137179	0.260985	0.00269503
2019-05-03 12:26 CEST	ETH 2	0.216119	0.119866	28.5174	0.00411851	-0.0201336	0.00285314	0.213265	-0.00163243	0.121499	3.04163e-05	0.0351387
2019-05-05 21:57 CEST	ETH 2	0.221205	0.119866	30.9139	0.00920471	-0.0201336	0.00149601	0.219709	-0.00138533	0.121252	0.00511009	168
2019-05-07 08:35 CEST	ETH 2	0.218153	0.135022	32.3569	0.00615299	-0.00497788	0.00067025	0.217483	-0.00134091	0.136363	6.30956e-06	0.207434
2019-05-09 09:33 CEST	ETH 2	0.222222	0.176448	34.3972	0.010222	0.0364477	-0.00049456	0.222717	-0.00139133	0.177839
2019-05-11 00:08 CEST	ETH 2	0.207981	0.152199	36.0049	-0.00401943	0.0121986	-0.00140099	0.209382	-0.00151043	0.153709
2019-05-11 20:50 CEST	ETH 2	0.206963	0.133001	36.8674	-0.00503667	-0.00699864	-0.00188036	0.208844	-0.00159881	0.1346
2019-05-12 17:33 CEST	ETH 2	0.199843	0.12896	37.7306	-0.0121574	-0.0110402	-0.00235392	0.202197	-0.0017022	0.130662
2019-05-14 02:58 CEST	ETH 2	0.18967	0.186552	39.1229	-0.0223298	0.0465516	-0.00310211	0.192772	-0.00189637	0.188448
2019-05-16 23:25 CEST	ETH 2	0.211032	0.118856	41.975	-0.000967702	-0.021144	-0.00455913	0.215591	-0.00237465	0.121231
2019-05-19 13:58 CEST	ETH 2	0.191705	0.0996588	44.5812	-0.0202953	-0.0403412	-0.00577989	0.197485	-0.00286927	0.102528
2019-05-21 12:29 CEST	ETH 2	0.207981	0.138053	46.5194	-0.00401943	-0.00194674	-0.00660618	0.214587	-0.00324967	0.141303
2019-05-23 10:46 CEST	ETH 2	0.196791	0.117846	48.4479	-0.0152091	-0.0221544	-0.00735088	0.204142	-0.00362309	0.121469
2019-05-31 13:57 CEST	ETH 2	0.216119	0.140074	56.5806	0.00411851	7.40244e-05	-0.00951015	0.225629	-0.00486584	0.14494
2019-06-01 03:04 CEST	ETH 2	0.195774	0.123908	57.1271	-0.0162263	-0.0160921	-0.0095934	0.205367	-0.00491787	0.128826
2019-06-03 13:55 CEST	ETH 2	0.21205	0.138053	59.5792	4.95399e-05	-0.00194674	-0.00986585	0.221915	-0.00508583	0.143139
2019-06-05 22:53 CEST	ETH 2	0.210015	0.131991	61.9528	-0.00198494	-0.00800902	-0.00997063	0.219986	-0.00513643	0.137127
2019-06-07 16:33 CEST	ETH 2	0.21205	0.111783	63.6889	4.95399e-05	-0.0282166	-0.00994799	0.221998	-0.00509708	0.11688
2019-06-09 10:10 CEST	ETH 2	0.196791	0.118856	65.4229	-0.0152091	-0.021144	-0.00984225	0.206633	-0.0049893	0.123845
2019-06-10 23:43 CEST	ETH 2	0.192722	0.0966276	66.9875	-0.0192781	-0.0433724	-0.00967654	0.202398	-0.0048309	0.101459
2019-06-13 08:49 CEST	ETH 2	0.193739	0.106731	69.3667	-0.0182608	-0.0332686	-0.00929984	0.203039	-0.00447509	0.111207
2019-06-16 20:22 CEST	ETH 2	0.199843	0.167354	72.8479	-0.0121574	0.0273543	-0.00849015	0.208333	-0.00369801	0.171052
2019-06-18 15:43 CEST	ETH 2	0.20086	0.140074	74.6542	-0.0111401	7.40244e-05	-0.00795705	0.208817	-0.00317369	0.143248
2019-06-20 15:20 CEST	ETH 2	0.204929	0.213832	76.6382	-0.00707115	0.0738318	-0.00728994	0.212219	-0.00250316	0.216335
2019-06-25 02:09 CEST	ETH 2	0.208998	0.100669	81.0889	-0.00300218	-0.0393308	-0.00552271	0.214521	-0.000650538	0.10132
2019-06-26 09:19 CEST	ETH 2	0.215101	0.138053	82.3875	0.00310126	-0.00194674	-0.00494775	0.220049	-2.3703e-05	0.138077
2019-06-27 23:24 CEST	ETH 2	0.205946	0.180489	83.9743	-0.00605391	0.0404893	-0.00421623	0.210162	0.000791551	0.179698
2019-06-30 00:20 CEST	ETH 2	0.211032	0.12997	86.0132	-0.000967702	-0.0100298	-0.00323852	0.214271	0.00191374	0.128056
2019-07-04 00:19 CEST	ETH 2	0.204929	0.114814	90.0125	-0.00707115	-0.0251855	-0.00124732	0.206176	0.00432886	0.110486
2019-07-05 23:00 CEST	ETH 2	0.213067	0.198676	91.9576	0.00106678	0.0586761	-0.000271221	0.213338	0.00558822	0.193088
2019-07-07 12:39 CEST	ETH 2	0.214084	0.105721	93.5264	0.00208402	-0.0342789	0.000506206	0.213578	0.00663513	0.0990859
2019-07-09 11:30 CEST	ETH 2	0.21205	0.151188	95.4785	4.95399e-05	0.0111882	0.00144821	0.210601	0.00796742	0.143221
2019-07-11 07:39 CEST	ETH 2	0.214084	0.176448	97.3181	0.00208402	0.0364477	0.00229629	0.211788	0.00924278	0.167205
2019-07-13 07:35 CEST	ETH 2	0.211032	0.126939	99.3153	-0.000967702	-0.0130609	0.00315614	0.207876	0.0106362	0.116303
2019-07-14 21:05 CEST	ETH 2	0.204929	0.12997	100.878	-0.00707115	-0.0100298	0.00377226	0.201157	0.0117231	0.118247
2019-07-16 15:22 CEST	ETH 2	0.205946	0.0966276	102.64	-0.00605391	-0.0433724	0.00439395	0.201552	0.0129348	0.0836928
2019-07-21 01:24 CEST	ETH 2	0.225274	0.140074	107.058	0.0132737	7.40244e-05	0.00551562	0.219758	0.015831	0.124243
2019-07-26 00:14 CEST	ETH 2	0.229343	0.158261	112.009	0.0173426	0.0182609	0.00577463	0.223568	0.0186249	0.139636
2019-07-27 05:51 CEST	ETH 2	0.215101	0.210801	113.243	0.00310126	0.0708007	0.00563224	0.209469	0.0192109	0.19159
2019-07-28 19:21 CEST	ETH 2	0.220187	0.125929	114.806	0.00818747	-0.0140713	0.00531446	0.214873	0.0198735	0.106055
2019-07-30 13:44 CEST	ETH 2	0.204929	0.10168	116.572	-0.00707115	-0.0383205	0.00475459	0.200174	0.0205019	0.0811777
2019-08-01 12:27 CEST	ETH 2	0.216119	0.165334	118.518	0.00411851	0.0253336	0.0038676	0.212251	0.0210262	0.144307
2019-08-03 19:14 CEST	ETH 2	0.214084	0.167354	120.801	0.00208402	0.0273543	0.00243066	0.211653	0.0213841	0.14597
2019-04-05 09:39 CEST	ETH 3	0.626067	0.212821	0.401389	0.0110669	-0.0861785	0.00588591	0.620181	-0.0370585	0.24988
2019-04-07 07:20 CEST	ETH 3	0.633188	0.247174	2.30486	0.0181876	-0.0518256	0.00715111	0.626036	-0.0317858	0.27896
2019-04-09 05:24 CEST	ETH 3	0.621998	0.244143	4.22431	0.00699792	-0.0548567	0.00810744	0.61389	-0.0270287	0.271172
2019-04-11 11:25 CEST	ETH 3	0.617929	0.293652	6.475	0.00292895	-0.00534805	0.00885668	0.609072	-0.0221191	0.315771
2019-04-13 22:50 CEST	ETH 3	0.618946	0.250206	8.95069	0.0039462	-0.0487944	0.0092648	0.609681	-0.0174891	0.267695
2019-04-16 23:06 CEST	ETH 3	0.62505	0.278496	11.9618	0.0100496	-0.0205038	0.00924915	0.6158	-0.0128455	0.291342
2019-04-18 16:38 CEST	ETH 3	0.62505	0.263341	13.6924	0.0100496	-0.0356595	0.00901922	0.61603	-0.0106227	0.273963
2019-04-22 00:39 CEST	ETH 3	0.624032	0.271424	17.0264	0.0090324	-0.0275764	0.00819442	0.615838	-0.00716024	0.278584
2019-04-23 14:06 CEST	ETH 3	0.619963	0.227977	18.5868	0.00496344	-0.0710228	0.00766137	0.612302	-0.00587548	0.233853
2019-04-25 20:35 CEST	ETH 3	0.626067	0.307797	20.8569	0.0110669	0.00879728	0.00674855	0.619318	-0.00434733	0.312145
2019-04-27 16:26 CEST	ETH 3	0.624032	0.322953	22.684	0.0090324	0.023953	0.00591506	0.618117	-0.00338399	0.326337
2019-04-29 06:11 CEST	ETH 3	0.608774	0.26233	24.2569	-0.00622622	-0.0366699	0.0051402	0.603634	-0.00272644	0.265057
2019-05-01 13:27 CEST	ETH 3	0.61386	0.23606	26.5597	-0.00114001	-0.0629398	0.00393128	0.609929	-0.00202041	0.238081
2019-05-04 07:00 CEST	ETH 3	0.627084	0.305777	29.291	0.0120841	0.00677652	0.00241831	0.624666	-0.00152706	0.307304
2019-05-06 11:04 CEST	ETH 3	0.617929	0.320932	31.4604	0.00292895	0.0219322	0.00118354	0.616745	-0.00136	0.322292
2019-05-08 02:03 CEST	ETH 3	0.628101	0.276475	33.0847	0.0131014	-0.0225245	0.000253741	0.627848	-0.00134467	0.27782
2019-05-11 04:18 CEST	ETH 3	0.600636	0.357306	36.1785	-0.0143642	0.058306	-0.00149793	0.602134	-0.00152694	0.358833
2019-05-12 00:59 CEST	ETH 3	0.610808	0.310828	37.0403	-0.00419174	0.0118284	-0.00197576	0.612784	-0.00161837	0.312447
2019-05-12 21:43 CEST	ETH 3	0.615894	0.301735	37.9042	0.000894471	0.002735	-0.00244832	0.618343	-0.00172466	0.30346
2019-05-14 07:08 CEST	ETH 3	0.605722	0.311839	39.2965	-0.00927795	0.0128388	-0.00319388	0.608916	-0.00192268	0.313761
2019-05-18 08:54 CEST	ETH 3	0.609791	0.292642	43.3701	-0.00520898	-0.00635843	-0.00522725	0.615018	-0.0026352	0.295277
2019-05-20 02:26 CEST	ETH 3	0.588429	0.34114	45.1007	-0.0265711	0.0421399	-0.00600859	0.594438	-0.00297094	0.344111
2019-05-22 05:30 CEST	ETH 3	0.598601	0.36741	47.2285	-0.0163986	0.0684098	-0.00688933	0.605491	-0.00338826	0.370798
2019-05-24 04:44 CEST	ETH 3	0.603688	0.286579	49.1965	-0.0113124	-0.0124207	-0.00761772	0.611305	-0.00376387	0.290343
2019-05-30 00:14 CEST	ETH 3	0.615894	0.298704	55.009	0.000894471	-0.000296146	-0.00922573	0.62512	-0.00468938	0.303393
2019-06-01 15:31 CEST	ETH 3	0.61386	0.232019	57.6458	-0.00114001	-0.0669813	-0.00966486	0.623525	-0.00496252	0.236981
2019-06-04 12:20 CEST	ETH 3	0.611826	0.297693	60.5132	-0.0031745	-0.00130653	-0.00992581	0.621751	-0.00511958	0.302813
2019-06-06 11:22 CEST	ETH 3	0.599619	0.316891	62.4729	-0.0153814	0.0178907	-0.00997263	0.609591	-0.00513164	0.322022
2019-06-08 09:12 CEST	ETH 3	0.614877	0.300725	64.3826	-0.000122771	0.00172462	-0.0099156	0.624793	-0.00506235	0.305787
2019-06-09 22:43 CEST	ETH 3	0.60267	0.308808	65.9458	-0.0123297	0.00980766	-0.00979423	0.612465	-0.00494291	0.313751
2019-06-11 12:40 CEST	ETH 3	0.598601	0.310828	67.5271	-0.0163986	0.0118284	-0.00960415	0.608206	-0.00476249	0.315591
2019-06-13 21:20 CEST	ETH 3	0.600636	0.31386	69.8882	-0.0143642	0.0148596	-0.00919767	0.609834	-0.00437821	0.318238
2019-06-15 19:25 CEST	ETH 3	0.610808	0.308808	71.8083	-0.00419174	0.00980766	-0.00876286	0.619571	-0.00396226	0.31277
2019-06-17 08:52 CEST	ETH 3	0.617929	0.304766	73.3687	0.00292895	0.00576614	-0.00834401	0.626273	-0.0035553	0.308321
2019-06-19 08:16 CEST	ETH 3	0.608774	0.284559	75.3438	-0.00622622	-0.0144415	-0.00773452	0.616508	-0.00295179	0.28751
2019-06-21 04:40 CEST	ETH 3	0.601653	0.283548	77.1937	-0.0133469	-0.0154519	-0.00708881	0.608742	-0.00229789	0.285846
2019-06-25 15:10 CEST	ETH 3	0.601653	0.211811	81.6312	-0.0133469	-0.0871889	-0.0052854	0.606938	-0.000393277	0.212204
2019-06-28 23:23 CEST	ETH 3	0.620981	0.296683	84.9736	0.00598068	-0.00231691	-0.00374165	0.624722	0.00133147	0.295352
2019-07-02 01:29 CEST	ETH 3	0.637257	0.281527	88.0611	0.0222565	-0.0174726	-0.00222635	0.639483	0.00311799	0.278409
2019-07-04 12:46 CEST	ETH 3	0.611826	0.353264	90.5312	-0.0031745	0.0542644	-0.000986437	0.612812	0.00466001	0.348604
2019-07-06 11:35 CEST	ETH 3	0.620981	0.392669	92.4819	0.00598068	0.0936693	-9.95441e-06	0.620991	0.00593534	0.386734
2019-07-08 01:11 CEST	ETH 3	0.597584	0.34114	94.0486	-0.0174159	0.0421399	0.000761535	0.596823	0.00698874	0.334151
2019-07-10 05:47 CEST	ETH 3	0.599619	0.324974	96.2403	-0.0153814	0.0259738	0.00180494	0.597814	0.00849387	0.31648
2019-07-12 01:36 CEST	ETH 3	0.616912	0.336088	98.066	0.00191171	0.037088	0.00262669	0.614285	0.00976425	0.326324
2019-07-13 20:06 CEST	ETH 3	0.607757	0.319922	99.8368	-0.00724346	0.0209219	0.00336789	0.604389	0.0109997	0.308922
2019-07-15 09:35 CEST	ETH 3	0.623015	0.331036	101.399	0.00801516	0.032036	0.0039647	0.61905	0.0120833	0.318953
2019-07-17 08:27 CEST	ETH 3	0.618946	0.297693	103.351	0.0039462	-0.00130653	0.00461999	0.614326	0.0134177	0.284276
2019-07-20 00:24 CEST	ETH 3	0.626067	0.303756	106.016	0.0110669	0.00475576	0.00531611	0.620751	0.0151735	0.288582
2019-07-21 13:51 CEST	ETH 3	0.605722	0.293652	107.576	-0.00927795	-0.00534805	0.00559804	0.600124	0.0161509	0.277501
2019-07-23 04:05 CEST	ETH 3	0.619963	0.305777	109.169	0.00496344	0.00677652	0.00577533	0.614188	0.0170979	0.288679
2019-07-24 13:46 CEST	ETH 3	0.618946	0.242123	110.573	0.0039462	-0.0568775	0.00582896	0.613117	0.0178812	0.224241
2019-07-26 12:44 CEST	ETH 3	0.620981	0.268392	112.53	0.00598068	-0.0306076	0.00572573	0.615255	0.0188785	0.249514
2019-07-27 18:25 CEST	ETH 3	0.628101	0.294662	113.767	0.0131014	-0.00433767	0.00554342	0.622558	0.0194433	0.275219
2019-07-29 07:54 CEST	ETH 3	0.634205	0.300725	115.328	0.0192048	0.00172462	0.00517168	0.629033	0.0200736	0.280651
2019-07-31 06:51 CEST	ETH 3	0.62505	0.374482	117.285	0.0100496	0.0754824	0.0044638	0.620586	0.0207157	0.353767
2019-08-02 05:24 CEST	ETH 3	0.607757	0.339119	119.224	-0.00724346	0.0401191	0.00347066	0.604286	0.0211682	0.317951
2019-08-03 02:33 CEST	ETH 3	0.624032	0.363368	120.106	0.0090324	0.0643682	0.00291612	0.621116	0.0213067	0.342062
2019-08-04 07:41 CEST	ETH 3	0.61386	0.316891	121.319	-0.00114001	0.0178907	0.00203992	0.61182	0.0214229	0.295468
2019-04-07 23:54 CEST	PC1_2005	0.63217	0.10269	2.99514	#N/A	#N/A	0.00753054	0.62464	-0.0300122	0.132702
2019-04-13 14:33 CEST	PC1_2005	0.628101	0.105721	8.60556	#N/A	#N/A	0.00923212	0.618869	-0.0180887	0.12381
2019-04-16 10:31 CEST	PC1_2005	0.645394	0.111783	11.4375	#N/A	#N/A	0.0092886	0.636106	-0.013581	0.125364
2019-05-20 10:46 CEST	PC1_2005	0.611826	0.171396	45.4479	#N/A	#N/A	-0.00615856	0.617984	-0.00303912	0.174435
2019-06-01 19:41 CEST	PC1_2005	0.607757	0.127949	57.8194	#N/A	#N/A	-0.00968712	0.617444	-0.00497641	0.132926
2019-06-04 21:26 CEST	PC1_2005	0.623015	0.07642	60.8924	#N/A	#N/A	-0.00994322	0.632958	-0.00512823	0.0815482
2019-07-05 01:37 CEST	PC1_2005	0.633188	0.168365	91.0667	#N/A	#N/A	-0.000717438	0.633905	0.0050055	0.163359
2019-07-12 23:13 CEST	PC1_2005	0.626067	0.149167	98.9667	#N/A	#N/A	0.00301144	0.623055	0.0103929	0.138775
2019-07-26 08:33 CEST	PC1_2005	0.637257	0.125929	112.356	#N/A	#N/A	0.00574389	0.631513	0.0187947	0.107134
2019-07-29 03:45 CEST	PC1_2005	0.62505	0.200697	115.156	#N/A	#N/A	0.00522099	0.619829	0.0200087	0.180688
2019-04-05 13:48 CEST	Mv143-b	0.674894	0.20878	0.574306	#N/A	#N/A	0.00601459	0.66888	-0.0365558	0.245336
2019-04-14 07:07 CEST	Mv143-b	0.68405	0.220905	9.29583	#N/A	#N/A	0.00929003	0.67476	-0.0169038	0.237808
2019-04-20 05:58 CEST	Mv143-b	0.682015	0.26132	15.2479	#N/A	#N/A	0.00869225	0.673323	-0.00887932	0.270199
2019-04-23 09:53 CEST	Mv143-b	0.677946	0.211811	18.4111	#N/A	#N/A	0.00772551	0.670221	-0.00601021	0.217821
2019-05-04 15:35 CEST	Mv143-b	0.673877	0.248185	29.6486	#N/A	#N/A	0.00221606	0.671661	-0.00148686	0.249672
2019-05-24 08:53 CEST	Mv143-b	0.670826	0.268392	49.3694	#N/A	#N/A	-0.00767752	0.678503	-0.00379592	0.272188
2019-06-05 01:36 CEST	Mv143-b	0.663705	0.266372	61.066	#N/A	#N/A	-0.00994985	0.673655	-0.00513119	0.271503
2019-07-03 11:33 CEST	Mv143-b	0.682015	0.265361	89.4806	#N/A	#N/A	-0.00151482	0.68353	0.00399316	0.261368
2019-07-06 15:46 CEST	Mv143-b	0.679981	0.234039	92.6562	#N/A	#N/A	7.66215e-05	0.679904	0.00605138	0.227988
2019-04-07 11:28 CEST	66-4.65	0.616912	0.198676	2.47708	#N/A	#N/A	0.00724961	0.609662	-0.0313365	0.230013
2019-04-22 17:14 CEST	66-4.65	0.62505	0.218884	17.7174	#N/A	#N/A	0.00796875	0.617081	-0.00656654	0.22545
2019-04-28 00:50 CEST	66-4.65	0.610808	0.237071	23.034	#N/A	#N/A	0.00574683	0.605061	-0.00322448	0.240295
2019-05-22 13:51 CEST	66-4.65	0.600636	0.284559	47.5764	#N/A	#N/A	-0.00702434	0.60766	-0.00345581	0.288014
2019-05-24 13:00 CEST	66-4.65	0.59555	0.296683	49.541	#N/A	#N/A	-0.00773616	0.603286	-0.00382753	0.300511
2019-06-01 11:22 CEST	66-4.65	0.589446	0.221915	57.4729	#N/A	#N/A	-0.00964186	0.599088	-0.00494816	0.226863
2019-06-03 22:22 CEST	66-4.65	0.605722	0.251216	59.9312	#N/A	#N/A	-0.0098913	0.615613	-0.0051006	0.256317
2019-06-06 07:15 CEST	66-4.65	0.606739	0.259299	62.3014	#N/A	#N/A	-0.0099728	0.616712	-0.00513387	0.264433
2019-07-06 19:56 CEST	66-4.65	0.618946	0.237071	92.8299	#N/A	#N/A	0.000162694	0.618784	0.00616727	0.230903
2019-05-13 10:09 CEST	MSK 2b	0.669808	0.324974	38.4222	#N/A	#N/A	-0.0027282	0.672536	-0.00179475	0.326769
2019-05-19 05:39 CEST	MSK 2b	0.676929	0.28961	44.2347	#N/A	#N/A	-0.0056245	0.682553	-0.00280178	0.292412
2019-05-19 22:16 CEST	MSK 2b	0.662688	0.248185	44.9271	#N/A	#N/A	-0.00593273	0.66862	-0.00293691	0.251122
2019-05-24 00:34 CEST	MSK 2b	0.663705	0.272434	49.0229	#N/A	#N/A	-0.00755698	0.671262	-0.0037315	0.276165
2019-06-09 06:00 CEST	MSK 2b	0.673877	0.219894	65.2493	#N/A	#N/A	-0.00985655	0.683734	-0.00500326	0.224897
2019-06-11 03:50 CEST	MSK 2b	0.665739	0.221915	67.159	#N/A	#N/A	-0.00965437	0.675394	-0.00480993	0.226725
2019-06-15 11:06 CEST	MSK 2b	0.656584	0.290621	71.4618	#N/A	#N/A	-0.00884803	0.665432	-0.00404424	0.294665
2019-07-17 04:18 CEST	MSK 2b	0.676929	0.28961	103.178	#N/A	#N/A	0.00456651	0.672362	0.0133008	0.27631
2019-07-25 10:55 CEST	MHD1	0.567067	0.278496	111.454	#N/A	#N/A	0.00580933	0.561258	0.018345	0.260151
2019-07-27 10:02 CEST	MHD1	0.548757	0.237071	113.417	#N/A	#N/A	0.0056046	0.543152	0.0192894	0.217781
2019-07-30 05:16 CEST	MHD1	0.544688	0.310828	116.219	#N/A	#N/A	0.00488434	0.539803	0.0203874	0.290441
2019-08-01 04:08 CEST	MHD1	0.552825	0.270413	118.172	#N/A	#N/A	0.00404737	0.548778	0.0209468	0.249466
2019-08-03 10:53 CEST	MHD1	0.54367	0.256268	120.453	#N/A	#N/A	0.00267903	0.540991	0.021349	0.234919
2019-08-04 11:50 CEST	MHD1	0.548757	0.290621	121.492	#N/A	#N/A	0.00190416	0.546852	0.0214321	0.269189
2019-04-15 03:49 CEST	JR	0.721688	0.121887	10.1583	#N/A	#N/A	0.00932142	0.712366	-0.0155026	0.13739
2019-04-20 01:50 CEST	JR	0.729826	0.194635	15.0757	#N/A	#N/A	0.00873367	0.721092	-0.009061	0.203696
2019-04-23 05:43 CEST	JR	0.728808	0.186552	18.2375	#N/A	#N/A	0.00778789	0.72102	-0.00614577	0.192697
2019-04-27 20:38 CEST	JR	0.71355	0.195645	22.859	#N/A	#N/A	0.00583126	0.707718	-0.00330327	0.198948
2019-05-04 11:18 CEST	JR	0.730843	0.26132	29.4701	#N/A	#N/A	0.00231707	0.728526	-0.00150626	0.262826
2019-06-09 01:52 CEST	JR	0.698291	0.170385	65.0771	#N/A	#N/A	-0.00986992	0.708161	-0.00501641	0.175402
2019-06-10 15:23 CEST	JR	0.71355	0.15523	66.6403	#N/A	#N/A	-0.00971901	0.723269	-0.00487116	0.160101
2019-07-15 05:24 CEST	JR	0.727791	0.228988	101.224	#N/A	#N/A	0.00390107	0.72389	0.0119629	0.217025
2019-07-27 22:35 CEST	JR	0.730843	0.242123	113.94	#N/A	#N/A	0.0055101	0.725333	0.0195181	0.222604
2019-07-28 11:02 CEST	JR	0.727791	0.140074	114.459	#N/A	#N/A	0.0053988	0.722392	0.0197347	0.120339
2019-07-27 01:41 CEST	DHC2-8	0.577239	0.241112	113.069	#N/A	#N/A	0.00565788	0.571581	0.0191316	0.22198
2019-07-29 16:42 CEST	DHC2-8	0.582325	0.229998	115.695	#N/A	#N/A	0.0050602	0.577265	0.020207	0.209791
2019-07-31 10:58 CEST	DHC2-8	0.578257	0.23505	117.456	#N/A	#N/A	0.00438806	0.573868	0.0207634	0.214286
2019-08-02 01:14 CEST	DHC2-8	0.57317	0.277486	119.051	#N/A	#N/A	0.00357209	0.569598	0.0211358	0.25635
2019-08-03 23:23 CEST	DHC2-8	0.58436	0.249195	120.974	#N/A	#N/A	0.00230316	0.582057	0.0213989	0.227796
2019-04-21 20:30 CEST	SPA121-02	0.655567	0.292642	16.8535	#N/A	#N/A	0.00824819	0.647319	-0.00731514	0.299957
2019-05-07 21:36 CEST	SPA121-02	0.644377	0.255257	32.8993	#N/A	#N/A	0.000359795	0.644017	-0.00134214	0.2566
2019-06-09 18:33 CEST	SPA121-02	0.631153	0.274455	65.7722	#N/A	#N/A	-0.009811	0.640964	-0.00495904	0.279414
				2019-04-05 00:01 CEST	<– time ZERO
Correction polynomial fitted on ETH1, ETH2, and ETH3 residuals
	x^4	x^3	x^2	x^1	intercept
∆47	-2.77085e-09	6.77196e-07	-4.81319e-05	0.000790641	0.00557627
∆48	-3.0373e-09	8.77069e-07	-8.22694e-05	0.00298712	-0.0382443
	Time	residual ∆47	residual ∆48
	1.26736	0.010222	-0.0787357
	2.82222	-0.00910563	0.00310517
	5.08611	0.00615299	-0.0181128
	9.46806	-0.00605391	0.0101778
	11.0882	0.00920471	0.00209479
	12.4799	0.00513575	0.00613631
	14.3833	0.0112392	-0.050445
	15.9396	0.0224289	-0.0160921
	17.5458	-0.000967702	7.40244e-05
	19.4653	0.0122564	-0.0100298
	21.375	-0.00198494	0.0445308
	21.9861	-0.00198494	-0.0433724
	23.2097	0.00411851	-0.0767149
	25.3278	0.0153082	0.013209
	27.9847	0.00920471	0.0253336
	30.3701	0.00717023	-0.0282166
	32.1833	0.00310126	-0.0160921
	33.6437	0.00920471	7.40244e-05
	35.8326	-0.000967702	0.00714669
	36.6951	-0.00503667	-0.0039675
	37.5576	-0.00910563	0.0182609
	38.95	-0.00605391	-0.0171025
	44.0618	-0.00808839	-0.00699864
	46.0007	-0.0213125	-0.000936357
	47.7521	0.0112392	0.00916745
	49.7493	-0.023347	0.00613631
	55.5292	-0.0141918	-0.0191232
	58.1681	0.00513575	-0.000936357
	61.2396	-0.000967702	0.0313958
	63.1646	-0.0121574	-0.0110402
	64.9049	-0.00808839	0.0172505
	66.466	-0.0172436	-0.0474139
	68.2208	-0.00401943	0.0536242
	69.1882	-0.0223298	-0.000936357
	70.4083	-0.0121574	-0.0272063
	72.3285	-0.00707115	0.0111882
	74.1208	0.00310126	-0.0575177
	76.0736	-0.00808839	-0.084798
	78.1257	-0.00910563	-0.0494346
	83.2653	-0.00300218	-0.0544866
	85.4924	0.00717023	-0.0201336
	89.3056	0.00717023	0.0657488
	91.2396	-0.00198494	-0.0150817
	93.0042	-0.000967702	0.0202816
	94.6097	0.00717023	0.00310517
	97.1437	4.95399e-05	0.0647384
	98.7924	0.0122564	0.04251
	100.356	-0.000967702	0.0495827
	102.117	0.00513575	0.0334166
	104.407	0.00106678	0.0404893
	106.539	0.00818747	0.0293751
	108.65	0.00310126	0.0293751
	109.343	0.00310126	-0.00598826
	111.281	0.00411851	0.0233128
	114.287	0.0142909	-0.0282166
	116.044	0.00106678	0.0202816
	117.998	0.010222	0.0192713
	120.279	-0.00198494	0.105154
	121.84	0.00310126	-0.021144
	1.78681	0.0183599	0.00512593
	3.35694	0.00615299	0.00613631
	5.95694	-0.00605391	0.00209479
	8.43264	0.00310126	0.00108441
	10.5562	0.0214116	0.0435204
	13.1701	0.0112392	0.00310517
	14.9028	0.0112392	-0.00295712
	18.0639	0.0203944	0.0313958
	20.1639	0.0183599	-0.00295712
	22.159	4.95399e-05	-0.0312478
	26.0326	0.0214116	-0.00497788
	28.5174	0.00411851	-0.0201336
	30.9139	0.00920471	-0.0201336
	32.3569	0.00615299	-0.00497788
	34.3972	0.010222	0.0364477
	36.0049	-0.00401943	0.0121986
	36.8674	-0.00503667	-0.00699864
	37.7306	-0.0121574	-0.0110402
	39.1229	-0.0223298	0.0465516
	41.975	-0.000967702	-0.021144
	44.5812	-0.0202953	-0.0403412
	46.5194	-0.00401943	-0.00194674
	48.4479	-0.0152091	-0.0221544
	56.5806	0.00411851	7.40244e-05
	57.1271	-0.0162263	-0.0160921
	59.5792	4.95399e-05	-0.00194674
	61.9528	-0.00198494	-0.00800902
	63.6889	4.95399e-05	-0.0282166
	65.4229	-0.0152091	-0.021144
	66.9875	-0.0192781	-0.0433724
	69.3667	-0.0182608	-0.0332686
	72.8479	-0.0121574	0.0273543
	74.6542	-0.0111401	7.40244e-05
	76.6382	-0.00707115	0.0738318
	81.0889	-0.00300218	-0.0393308
	82.3875	0.00310126	-0.00194674
	83.9743	-0.00605391	0.0404893
	86.0132	-0.000967702	-0.0100298
	90.0125	-0.00707115	-0.0251855
	91.9576	0.00106678	0.0586761
	93.5264	0.00208402	-0.0342789
	95.4785	4.95399e-05	0.0111882
	97.3181	0.00208402	0.0364477
	99.3153	-0.000967702	-0.0130609
	100.878	-0.00707115	-0.0100298
	102.64	-0.00605391	-0.0433724
	107.058	0.0132737	7.40244e-05
	112.009	0.0173426	0.0182609
	113.243	0.00310126	0.0708007
	114.806	0.00818747	-0.0140713
	116.572	-0.00707115	-0.0383205
	118.518	0.00411851	0.0253336
	120.801	0.00208402	0.0273543
	0.401389	0.0110669	-0.0861785
	2.30486	0.0181876	-0.0518256
	4.22431	0.00699792	-0.0548567
	6.475	0.00292895	-0.00534805
	8.95069	0.0039462	-0.0487944
	11.9618	0.0100496	-0.0205038
	13.6924	0.0100496	-0.0356595
	17.0264	0.0090324	-0.0275764
	18.5868	0.00496344	-0.0710228
	20.8569	0.0110669	0.00879728
	22.684	0.0090324	0.023953
	24.2569	-0.00622622	-0.0366699
	26.5597	-0.00114001	-0.0629398
	29.291	0.0120841	0.00677652
	31.4604	0.00292895	0.0219322
	33.0847	0.0131014	-0.0225245
	36.1785	-0.0143642	0.058306
	37.0403	-0.00419174	0.0118284
	37.9042	0.000894471	0.002735
	39.2965	-0.00927795	0.0128388
	43.3701	-0.00520898	-0.00635843
	45.1007	-0.0265711	0.0421399
	47.2285	-0.0163986	0.0684098
	49.1965	-0.0113124	-0.0124207
	55.009	0.000894471	-0.000296146
	57.6458	-0.00114001	-0.0669813
	60.5132	-0.0031745	-0.00130653
	62.4729	-0.0153814	0.0178907
	64.3826	-0.000122771	0.00172462
	65.9458	-0.0123297	0.00980766
	67.5271	-0.0163986	0.0118284
	69.8882	-0.0143642	0.0148596
	71.8083	-0.00419174	0.00980766
	73.3687	0.00292895	0.00576614
	75.3438	-0.00622622	-0.0144415
	77.1937	-0.0133469	-0.0154519
	81.6312	-0.0133469	-0.0871889
	84.9736	0.00598068	-0.00231691
	88.0611	0.0222565	-0.0174726
	90.5312	-0.0031745	0.0542644
	92.4819	0.00598068	0.0936693
	94.0486	-0.0174159	0.0421399
	96.2403	-0.0153814	0.0259738
	98.066	0.00191171	0.037088
	99.8368	-0.00724346	0.0209219
	101.399	0.00801516	0.032036
	103.351	0.0039462	-0.00130653
	106.016	0.0110669	0.00475576
	107.576	-0.00927795	-0.00534805
	109.169	0.00496344	0.00677652
	110.573	0.0039462	-0.0568775
	112.53	0.00598068	-0.0306076
	113.767	0.0131014	-0.00433767
	115.328	0.0192048	0.00172462
	117.285	0.0100496	0.0754824
	119.224	-0.00724346	0.0401191
	120.106	0.0090324	0.0643682
	121.319	-0.00114001	0.0178907
