# Supplementary material for: Dual clumped isotope thermometry resolves kinetic biases in carbonate formation temperatures
Source: Nat Commun. 2020 Aug 10;11:4005. doi: 10.1038/s41467-020-17501-0 (PMC7418028; doi:10.1038/s41467-020-17501-0)
Supplement: Supplementary file 6 — Supplementary Data 4 [file 41467_2020_17501_MOESM6_ESM.xlsx]

## Sheet: equilibrium gases
ID	Sample	δ45 (raw)	δ45 (raw) SD	δ46 (raw)	δ46 (raw) SD	δ47 (raw)	δ47 (raw) SD	δ48 (raw)	δ48 (raw) SD	δ49 (raw)	δ49 (raw) SD	∆47 (raw)	∆47 (raw) SD	∆48 (raw)	∆48 (raw) SD	∆49 (raw)	∆49 (raw) SD	δ13C VPDB (CO2)	δ13C VPDB (CO2) SD	δ18O VSMOW (CO2)	δ18O VSMOW (CO2) SD	Acquisitions
2020-01-13 16:39 CET	HG	-14.554	0.002	-6.473	0.002	-22.105	0.032	-13.167	0.078	-23.065	3.117	-0.841	0.032	-0.267	0.077	5.066	3.208	-19.47	0	18.65	0	13
2020-01-15 20:11 CET	HG	0.052	0.002	-0.552	0.002	-1.331	0.028	-1.465	0.095	2.656	2.405	-0.843	0.029	-0.363	0.098	3.688	2.407	-4.12	0	24.69	0	13
2020-01-17 15:46 CET	HG	6.459	0.002	12.247	0.003	17.937	0.017	24.287	0.08	31.485	3.427	-0.832	0.018	-0.348	0.08	0.217	3.326	2.23	0	37.81	0	13
2020-01-21 16:48 CET	HG	-20.962	0.002	-9.242	0.002	-31.328	0.019	-18.689	0.102	-33.875	3.374	-0.841	0.02	-0.297	0.105	6.388	3.515	-26.2	0	15.82	0	13
2020-01-22 17:45 CET	HG	-0.057	0.001	-1.543	0.005	-2.418	0.026	-3.412	0.094	0.905	2.408	-0.844	0.024	-0.329	0.099	4.008	2.419	-4.2	0	23.68	0	13
2020-01-24 17:04 CET	HG	6.447	0.001	11.281	0.003	16.966	0.023	22.356	0.082	30.309	3.394	-0.835	0.022	-0.327	0.084	0.966	3.296	2.26	0	36.82	0	13
2020-01-28 16:57 CET	HG	-20.143	0.002	-8.884	0.002	-30.142	0.025	-17.954	0.084	-26.792	3.192	-0.835	0.027	-0.271	0.087	12.145	3.319	-25.34	0	16.19	0	13
2020-01-29 18:15 CET	HG	-0.105	0.002	-1.716	0.003	-2.619	0.031	-3.691	0.1	7.993	2.986	-0.825	0.031	-0.263	0.1	11.514	2.995	-4.25	0	23.5	0	13
2020-01-31 21:04 CET	HG	6.492	0.002	10.499	0.003	16.258	0.033	20.856	0.103	49.019	3.232	-0.816	0.032	-0.246	0.103	20.647	3.144	2.33	0	36.02	0	13
2020-02-04 18:45 CET	HG	-15.034	0.002	-6.962	0.003	-23.064	0.021	-14.136	0.095	-21.722	3.511	-0.835	0.022	-0.265	0.098	7.947	3.618	-19.96	0	18.15	0	13
2020-02-05 15:51 CET	HG	-0.052	0.002	-1.519	0.003	-2.383	0.019	-3.31	0.059	3.8	2.528	-0.838	0.02	-0.276	0.059	6.858	2.535	-4.2	0	23.7	0	13
2020-02-10 18:09 CET	HG	6.385	0.002	11.266	0.003	16.895	0.019	22.306	0.127	35.322	2.323	-0.826	0.021	-0.344	0.124	5.933	2.255	2.19	0	36.81	0	13
2020-02-11 15:15 CET	HG	-14.188	0.001	-6.556	0.003	-21.804	0.026	-13.349	0.089	-23.089	4.06	-0.834	0.028	-0.284	0.091	4.81	4.175	-19.08	0	18.56	0	13
2020-02-12 16:58 CET	HG	-0.016	0.002	-1.88	0.002	-2.686	0.031	-4.064	0.101	1.111	3.666	-0.823	0.031	-0.308	0.101	4.838	3.681	-4.15	0	23.33	0	13
2020-02-14 17:11 CET	HG	6.352	0.002	10.193	0.002	15.79	0.033	20.172	0.094	31.935	2.469	-0.836	0.033	-0.312	0.091	4.77	2.404	2.19	0	35.71	0	13
2020-02-18 17:35 CET	HG	-17.72	0.002	-7.772	0.003	-26.602	0.029	-15.789	0.099	-31.064	2.984	-0.843	0.03	-0.311	0.102	2.839	3.086	-22.8	0	17.32	0	13
2020-02-19 18:32 CET	HG	-0.012	0.002	-1.579	0.003	-2.396	0.022	-3.482	0.104	2.904	3.016	-0.832	0.021	-0.326	0.103	6.037	3.025	-4.15	0	23.64	0	13
2020-02-21 16:55 CET	HG	6.471	0.002	11.09	0.003	16.806	0.025	21.979	0.084	33.649	2.625	-0.831	0.025	-0.317	0.085	4.559	2.549	2.29	0	36.63	0	13
2020-02-25 17:16 CET	HG	-17.715	0.002	-8.125	0.003	-26.918	0.021	-16.515	0.066	-27.975	2.71	-0.822	0.02	-0.336	0.068	6.735	2.805	-22.78	0	16.96	0	13
2020-02-26 18:34 CET	HG	-0.066	0.003	-1.411	0.003	-2.292	0.026	-3.147	0.095	1.465	2.804	-0.837	0.024	-0.327	0.092	4.319	2.808	-4.22	0	23.81	0	13
2020-02-28 15:29 CET	HG	6.428	0.002	10.758	0.003	16.43	0.021	21.314	0.091	33.619	2.88	-0.834	0.02	-0.311	0.089	5.223	2.799	2.25	0	36.29	0	13
2020-03-03 18:07 CET	HG	-17.719	0.002	-8.189	0.002	-26.987	0.033	-16.647	0.112	-28.54	2.929	-0.826	0.035	-0.342	0.114	6.281	3.034	-22.78	0	16.9	0	13
2020-01-14 21:58 CET	25G	-0.016	0.001	-3.356	0.002	-3.274	0.024	-6.675	0.068	-0.024	3.166	0.042	0.025	0.025	0.067	6.621	3.188	-4.09	0	21.82	0	13
2020-01-16 18:31 CET	25G	-0.012	0.002	-3.243	0.003	-3.153	0.022	-6.438	0.089	-0.438	3.715	0.048	0.024	0.039	0.091	5.976	3.737	-4.09	0	21.93	0	13
2020-01-20 19:38 CET	25G	-32.927	0.002	35.196	0.003	-0.543	0.021	71.645	0.089	35.808	3.192	0.037	0.02	0.013	0.086	2.997	3.091	-40.57	0	61.46	0	13
2020-01-23 15:15 CET	25G	-33.904	0.002	8.584	0.004	-26.795	0.03	17.251	0.133	-10.111	2.517	0.047	0.031	0.009	0.133	9.907	2.566	-40.64	0	34.15	0	13
2020-01-27 19:06 CET	25G	0.667	0.002	17.019	0.003	17.499	0.019	34.369	0.148	52.326	2.898	0.069	0.019	0.04	0.147	17.281	2.796	-4.11	0	42.73	0	13
2020-01-30 19:45 CET	25G	-0.04	0.002	-3.467	0.002	-3.386	0.026	-6.917	0.082	3.299	3.116	0.064	0.026	0.005	0.082	10.212	3.137	-4.11	0	21.7	0	13
2020-02-03 16:57 CET	25G	-33.819	0.003	9.05	0.003	-26.241	0.028	18.258	0.085	2.747	2.649	0.072	0.029	0.075	0.086	22.001	2.699	-40.57	0	34.63	0	13
2020-02-06 17:36 CET	25G	1.231	0.002	35.941	0.004	36.686	0.035	73.175	0.096	78.157	2.938	0.048	0.036	0.001	0.088	4.575	2.738	-4.2	0	62.15	0	13
2020-02-07 18:39 CET	25G	-0.044	0.002	-3.48	0.003	-3.4	0.021	-6.896	0.087	1.934	1.784	0.067	0.023	0.052	0.086	8.868	1.793	-4.12	0	21.69	0	13
2020-02-10 22:20 CET	25G	-33.904	0.002	7.821	0.005	-27.507	0.025	15.736	0.099	-13.318	2.369	0.059	0.025	0.033	0.099	8.131	2.416	-40.62	0	33.37	0	13
2020-02-13 18:09 CET	25G	1.324	0.002	36.654	0.004	37.495	0.024	74.665	0.089	81.489	2.936	0.057	0.026	0.013	0.083	6.219	2.735	-4.13	0	62.88	0	13
2020-02-17 20:18 CET	25G	1.339	0.002	36.616	0.004	37.483	0.02	74.62	0.116	82.788	3.876	0.067	0.018	0.044	0.111	7.485	3.607	-4.11	0	62.84	0	13
2020-02-20 19:54 CET	25G	-0.05	0.002	-3.476	0.003	-3.42	0.019	-6.931	0.125	-0.252	2.588	0.049	0.017	0.009	0.125	6.666	2.605	-4.12	0	21.69	0	13
2020-02-24 20:12 CET	25G	-33.892	0.002	8.231	0.002	-27.137	0.021	16.572	0.093	-13.555	2.378	0.026	0.023	0.042	0.093	7.071	2.429	-40.62	0	33.79	0	13
2020-02-27 16:34 CET	25G	1.346	0.001	36.496	0.003	37.367	0.029	74.34	0.121	81.722	2.661	0.061	0.028	0.015	0.115	6.714	2.477	-4.1	0	62.72	0	13
2020-03-02 16:43 CET	25G	0.014	0.002	-3.22	0.003	-3.088	0.02	-6.383	0.09	1.953	4.041	0.064	0.021	0.048	0.093	8.31	4.068	-4.07	0	21.95	0	13
m/z 47.5 scaling factors
on m/z 47	-1,01000
on m/z 48	-0,92326
on m/z 49	-0,55500

## Sheet: standards
ID	Sample	δ45 (raw)	δ45 (raw) SD	δ46 (raw)	δ46 (raw) SD	δ47 (raw)	δ47 (raw) SD	δ48 (raw)	δ48 (raw) SD	δ49 (raw)	δ49 (raw) SD	∆47 (raw)	∆47 (raw) SD	∆48 (raw)	∆48 (raw) SD	∆49 (raw)	∆49 (raw) SD	δ13C VPDB (CO2)	δ13C VPDB (CO2) SD	δ18O VSMOW (CO2)	δ18O VSMOW (CO2) SD	Acquisitions	∆47 (CDES90,uc)	∆48 (CDES90,uc)
2020-01-16 00:20 CET	ETH 1	6.457	0.002	11.422	0.002	17.288	0.025	22.806	0.055	31.534	2.711	-0.665	0.025	-0.165	0.052	1.872	2.63	2.26	0	36.97	0	13	0.198388	0.154745
2020-01-16 13:46 CET	ETH 1	6.451	0.002	11.401	0.003	17.27	0.036	22.705	0.1	30.969	2.065	-0.656	0.036	-0.221	0.099	1.371	2.007	2.25	0	36.95	0	13	0.207579	0.101301
2020-01-17 07:07 CET	ETH 1	6.451	0.001	11.427	0.004	17.283	0.024	22.801	0.092	30.649	1.62	-0.669	0.022	-0.179	0.093	1.008	1.578	2.25	0	36.97	0	13	0.194302	0.141384
2020-01-18 04:14 CET	ETH 1	6.455	0.002	11.376	0.003	17.253	0.017	22.627	0.106	30.653	3.223	-0.653	0.018	-0.248	0.101	1.109	3.132	2.26	0	36.92	0	13	0.210643	0.0755328
2020-01-19 09:23 CET	ETH 1	6.422	0.002	11.413	0.003	17.266	0.03	22.788	0.105	35.279	3.048	-0.643	0.029	-0.165	0.104	5.564	2.958	2.22	0	36.96	0	13	0.220856	0.154745
2020-01-21 12:38 CET	ETH 1	6.447	0.002	11.488	0.002	17.354	0.029	22.911	0.078	32.762	3.234	-0.654	0.029	-0.192	0.078	2.947	3.139	2.25	0	37.04	0	13	0.209622	0.128977
2020-01-22 01:05 CET	ETH 1	6.451	0.002	11.428	0.003	17.291	0.015	22.836	0.129	32.905	1.962	-0.662	0.016	-0.146	0.131	3.199	1.904	2.25	0	36.97	0	13	0.201452	0.172878
2020-01-24 03:53 CET	ETH 1	6.395	0.001	11.308	0.003	17.125	0.022	22.533	0.099	33.994	3.462	-0.652	0.023	-0.205	0.097	4.55	3.363	2.2	0	36.85	0	13	0.211665	0.11657
2020-01-25 22:28 CET	ETH 1	6.379	0.001	11.542	0.003	17.352	0.019	23.017	0.079	32.473	2.433	-0.639	0.019	-0.197	0.078	2.632	2.363	2.17	0	37.09	0	13	0.224941	0.124205
2020-01-28 03:29 CET	ETH 1	6.415	0.002	11.429	0.003	17.285	0.035	22.834	0.059	48.243	3.993	-0.632	0.035	-0.151	0.059	18.132	3.881	2.22	0	36.98	0	13	0.232091	0.168106
2020-01-30 02:34 CET	ETH 1	6.372	0.001	11.431	0.004	17.215	0.021	22.795	0.079	42.772	4.572	-0.658	0.02	-0.192	0.076	12.861	4.44	2.17	0	36.98	0	13	0.205537	0.128977
2020-02-01 05:26 CET	ETH 1	6.446	0.002	11.463	0.002	17.34	0.02	22.917	0.094	48.313	3.408	-0.643	0.021	-0.138	0.091	18.099	3.308	2.25	0	37.01	0	13	0.220856	0.180512
2020-02-02 18:56 CET	ETH 1	6.41	0.002	11.457	0.003	17.284	0.018	22.93	0.112	32.729	3.371	-0.655	0.017	-0.112	0.11	3.014	3.276	2.21	0	37	0	13	0.208601	0.205326
2020-02-04 14:20 CET	ETH 1	6.459	0.002	11.447	0.003	17.317	0.03	22.792	0.133	39.306	3.145	-0.663	0.028	-0.228	0.131	9.369	3.053	2.26	0	36.99	0	13	0.20043	0.0946201
2020-02-06 13:26 CET	ETH 1	6.435	0.002	11.433	0.002	17.288	0.03	22.81	0.159	32.388	3.497	-0.654	0.029	-0.183	0.158	2.704	3.397	2.24	0	36.98	0	13	0.209622	0.137566
2020-02-08 19:55 CET	ETH 1	6.453	0.001	11.467	0.003	17.347	0.027	22.942	0.118	37.167	2.267	-0.647	0.028	-0.121	0.115	7.258	2.202	2.25	0	37.01	0	13	0.216771	0.196737
2020-02-10 09:19 CET	ETH 1	6.438	0.002	11.483	0.002	17.343	0.016	22.893	0.074	36.534	2.495	-0.652	0.016	-0.201	0.072	6.628	2.422	2.24	0	37.03	0	13	0.211665	0.120388
2020-02-12 12:27 CET	ETH 1	6.364	0.002	11.379	0.003	17.161	0.025	22.712	0.099	35.215	2.898	-0.653	0.024	-0.171	0.095	5.63	2.814	2.16	0	36.92	0	13	0.210643	0.149019
2020-02-14 11:27 CET	ETH 1	6.428	0.001	11.492	0.003	17.339	0.024	22.947	0.097	36.479	3.619	-0.653	0.024	-0.164	0.096	6.57	3.515	2.23	0	37.04	0	13	0.210643	0.155699
2020-02-17 16:09 CET	ETH 1	6.44	0.002	11.515	0.002	17.373	0.013	22.987	0.137	37.632	3.045	-0.654	0.015	-0.171	0.135	7.632	2.96	2.24	0	37.06	0	13	0.209622	0.149019
2020-02-19 14:22 CET	ETH 1	6.396	0.001	11.449	0.003	17.28	0.028	22.866	0.096	37.501	2.931	-0.638	0.027	-0.16	0.094	7.679	2.849	2.2	0	37	0	13	0.225963	0.159517
2020-02-21 12:45 CET	ETH 1	6.455	0.002	11.453	0.003	17.322	0.023	22.83	0.08	35.103	2.443	-0.66	0.021	-0.202	0.077	5.28	2.371	2.26	0	37	0	13	0.203494	0.119433
2020-02-23 02:11 CET	ETH 1	6.456	0.002	11.521	0.003	17.401	0.028	23.02	0.128	35.076	2.904	-0.65	0.027	-0.152	0.126	5.12	2.822	2.26	0	37.07	0	13	0.213707	0.167151
2020-02-24 16:03 CET	ETH 1	6.465	0.002	11.549	0.002	17.432	0.025	23.041	0.102	36.173	2.289	-0.656	0.024	-0.187	0.097	6.12	2.223	2.26	0	37.1	0	13	0.207579	0.133749
2020-02-26 14:20 CET	ETH 1	6.41	0.002	11.568	0.004	17.409	0.016	23.076	0.104	36.659	2.582	-0.64	0.017	-0.19	0.102	6.614	2.508	2.21	0	37.12	0	13	0.22392	0.130886
2020-02-29 03:56 CET	ETH 1	6.468	0.001	11.498	0.003	17.385	0.02	22.895	0.114	32.875	2.437	-0.655	0.018	-0.227	0.112	3.016	2.369	2.27	0	37.05	0	13	0.208601	0.0955744
2020-03-03 05:11 CET	ETH 1	6.427	0.002	11.516	0.002	17.369	0.026	22.976	0.083	35.096	2.902	-0.646	0.026	-0.185	0.08	5.18	2.819	2.23	0	37.06	0	13	0.217792	0.135658
2020-01-16 04:31 CET	ETH 2	-5.531	0.002	-5.262	0.004	-11.494	0.022	-10.692	0.087	-10.09	2.324	-0.652	0.022	-0.198	0.088	6.156	2.364	-9.9	0	19.87	0	13	0.211665	0.123251
2020-01-16 22:47 CET	ETH 2	-5.509	0.002	-5.243	0.002	-11.457	0.03	-10.641	0.066	-9.799	2.432	-0.656	0.03	-0.185	0.068	6.39	2.471	-9.88	0	19.89	0	13	0.207579	0.135658
2020-01-17 11:34 CET	ETH 2	-5.532	0.001	-5.298	0.002	-11.535	0.027	-10.793	0.108	-10.722	3.954	-0.656	0.028	-0.228	0.11	5.585	4.02	-9.9	0	19.84	0	13	0.207579	0.0946201
2020-01-18 08:23 CET	ETH 2	-5.545	0.002	-5.316	0.002	-11.571	0.031	-10.793	0.088	-10.738	2.855	-0.661	0.032	-0.191	0.087	5.62	2.899	-9.91	0	19.82	0	13	0.202473	0.129931
2020-01-19 21:52 CET	ETH 2	-5.519	0.002	-5.215	0.002	-11.44	0.027	-10.572	0.08	-7.305	3.764	-0.656	0.028	-0.172	0.083	8.881	3.827	-9.89	0	19.92	0	13	0.207579	0.148064
2020-01-22 05:14 CET	ETH 2	-5.516	0.002	-5.226	0.003	-11.442	0.027	-10.617	0.123	-11.494	2.331	-0.65	0.028	-0.195	0.124	4.64	2.367	-9.89	0	19.91	0	13	0.213707	0.126114
2020-01-22 22:08 CET	ETH 2	-5.537	0.002	-5.312	0.002	-11.549	0.031	-10.719	0.081	-7.839	1.902	-0.652	0.032	-0.125	0.083	8.549	1.933	-9.9	0	19.82	0	13	0.211665	0.192919
2020-01-24 21:14 CET	ETH 2	-5.502	0.002	-5.181	0.002	-11.387	0.017	-10.496	0.058	-8.889	3.303	-0.653	0.018	-0.162	0.061	7.184	3.355	-9.87	0	19.96	0	13	0.210643	0.157608
2020-01-26 11:36 CET	ETH 2	-5.474	0.002	-5.018	0.003	-11.206	0.018	-10.175	0.096	-13.869	2.689	-0.66	0.019	-0.166	0.096	1.771	2.728	-9.85	0	20.12	0	13	0.203494	0.15379
2020-01-28 21:03 CET	ETH 2	-5.497	0.002	-5.149	0.002	-11.34	0.025	-10.482	0.084	-3.841	2.745	-0.642	0.024	-0.213	0.083	12.244	2.789	-9.87	0	19.99	0	13	0.221878	0.108935
2020-01-30 15:36 CET	ETH 2	-5.531	0.002	-5.27	0.002	-11.505	0.029	-10.69	0.079	-6.29	2.448	-0.655	0.028	-0.18	0.082	10.034	2.489	-9.9	0	19.86	0	13	0.208601	0.140429
2020-02-01 17:59 CET	ETH 2	-5.536	0.002	-5.209	0.004	-11.447	0.019	-10.53	0.071	1.633	2.977	-0.651	0.02	-0.14	0.074	17.97	3.026	-9.91	0	19.93	0	13	0.212686	0.178604
2020-02-03 07:26 CET	ETH 2	-5.464	0.002	-5.194	0.003	-11.361	0.027	-10.536	0.119	-4.38	3.126	-0.652	0.026	-0.176	0.12	11.752	3.174	-9.83	0	19.94	0	13	0.211665	0.144247
2020-02-05 07:16 CET	ETH 2	-5.537	0.002	-5.284	0.003	-11.521	0.026	-10.711	0.102	-6.613	2.803	-0.651	0.027	-0.173	0.103	9.741	2.849	-9.91	0	19.85	0	13	0.212686	0.14711
2020-02-07 06:04 CET	ETH 2	-5.508	0.002	-5.284	0.003	-11.496	0.025	-10.711	0.086	-9.415	2.486	-0.655	0.024	-0.173	0.085	6.861	2.527	-9.87	0	19.85	0	13	0.208601	0.14711
2020-02-09 08:21 CET	ETH 2	-5.497	0.002	-5.221	0.004	-11.409	0.029	-10.564	0.13	-6.692	2.523	-0.642	0.028	-0.151	0.134	9.49	2.565	-9.87	0	19.91	0	13	0.221878	0.168106
2020-02-11 06:42 CET	ETH 2	-5.524	0.002	-5.149	0.003	-11.393	0.018	-10.411	0.099	-9.227	2.326	-0.669	0.019	-0.142	0.101	6.8	2.365	-9.9	0	19.99	0	13	0.194302	0.176695
2020-02-13 05:26 CET	ETH 2	-5.534	0.003	-5.26	0.003	-11.486	0.026	-10.688	0.084	-9.412	2.693	-0.642	0.026	-0.197	0.089	6.845	2.74	-9.9	0	19.87	0	13	0.221878	0.124205
2020-02-15 01:30 CET	ETH 2	-5.501	0.001	-5.207	0.003	-11.404	0.026	-10.577	0.097	-10.82	3.544	-0.646	0.027	-0.193	0.099	5.272	3.602	-9.87	0	19.93	0	13	0.217792	0.128023
2020-02-16 14:57 CET	ETH 2	-5.463	0.001	-5.187	0.002	-11.352	0.025	-10.51	0.089	-10.683	3.684	-0.653	0.027	-0.165	0.09	5.33	3.743	-9.83	0	19.95	0	13	0.210643	0.154745
2020-02-18 08:50 CET	ETH 2	-5.453	0.002	-5.117	0.003	-11.269	0.031	-10.399	0.061	-11.364	2.559	-0.647	0.031	-0.192	0.063	4.49	2.598	-9.82	0	20.02	0	13	0.216771	0.128977
2020-02-20 07:01 CET	ETH 2	-5.412	0.001	-5.057	0.001	-11.156	0.026	-10.255	0.114	-10.079	3.011	-0.636	0.026	-0.169	0.115	5.631	3.061	-9.78	0	20.08	0	13	0.228005	0.150927
2020-02-22 01:13 CET	ETH 2	-5.476	0.002	-5.185	0.001	-11.357	0.026	-10.52	0.075	-9.928	3.589	-0.647	0.026	-0.18	0.075	6.106	3.647	-9.84	0	19.95	0	13	0.216771	0.140429
2020-02-23 14:38 CET	ETH 2	-5.448	0.002	-5.089	0.003	-11.229	0.022	-10.327	0.085	-9.225	3.495	-0.64	0.022	-0.177	0.086	6.602	3.551	-9.82	0	20.05	0	13	0.22392	0.143292
2020-02-25 08:41 CET	ETH 2	-5.449	0.002	-5.041	0.003	-11.198	0.021	-10.267	0.09	-8.449	3.554	-0.655	0.021	-0.212	0.088	7.296	3.609	-9.82	0	20.1	0	13	0.208601	0.10989
2020-02-27 07:04 CET	ETH 2	-5.522	0.002	-5.136	0.002	-11.351	0.031	-10.427	0.097	-10.756	2.39	-0.641	0.03	-0.184	0.099	5.218	2.429	-9.89	0	20	0	13	0.222899	0.136612
2020-03-01 04:53 CET	ETH 2	-5.446	0.001	-5.134	0.003	-11.287	0.032	-10.476	0.116	-11.202	3.479	-0.657	0.032	-0.238	0.114	4.68	3.534	-9.81	0	20	0	13	0.206558	0.0850765
2020-03-03 22:15 CET	ETH 2	-5.507	0.002	-5.267	0.004	-11.488	0.023	-10.688	0.133	-11.343	3.637	-0.665	0.022	-0.184	0.137	4.866	3.696	-9.87	0	19.87	0	13	0.198388	0.136612
2020-01-16 08:40 CET	ETH 3	6.143	0.002	11.81	0.003	17.753	0.024	23.755	0.099	33.192	2.174	-0.264	0.023	-0.005	0.1	3.058	2.111	1.91	0	37.37	0	13	0.607929	0.307442
2020-01-17 02:58 CET	ETH 3	6.148	0.001	11.825	0.003	17.771	0.025	23.74	0.116	32.161	3.284	-0.265	0.024	-0.048	0.114	2.025	3.188	1.92	0	37.38	0	13	0.606908	0.266405
2020-01-18 00:06 CET	ETH 3	6.158	0.002	11.839	0.002	17.803	0.022	23.777	0.093	32.623	2.636	-0.259	0.022	-0.039	0.092	2.435	2.557	1.93	0	37.4	0	13	0.613036	0.274994
2020-01-18 20:55 CET	ETH 3	6.082	0.001	11.767	0.004	17.658	0.029	23.697	0.083	41.018	2.99	-0.253	0.03	0.024	0.076	10.807	2.901	1.85	0	37.32	0	13	0.619164	0.335119
2020-01-20 23:47 CET	ETH 3	6.141	0.002	11.862	0.003	17.812	0.022	23.845	0.063	35.787	4.012	-0.254	0.022	-0.02	0.065	5.48	3.893	1.91	0	37.42	0	13	0.618142	0.293127
2020-01-23 10:51 CET	ETH 3	6.07	0.002	11.743	0.003	17.611	0.03	23.635	0.099	33.96	3.47	-0.263	0.03	0.011	0.096	4.014	3.37	1.84	0	37.3	0	13	0.608951	0.322712
2020-01-29 09:27 CET	ETH 3	6.151	0.002	11.875	0.004	17.834	0.02	23.886	0.068	43.191	2.437	-0.257	0.022	-0.005	0.069	12.63	2.364	1.92	0	37.43	0	13	0.615079	0.307442
2020-01-31 08:13 CET	ETH 3	6.137	0.003	11.84	0.003	17.775	0.025	23.836	0.103	43.186	2.682	-0.266	0.023	0.015	0.102	12.709	2.604	1.9	0	37.4	0	13	0.605887	0.32653
2020-02-02 06:26 CET	ETH 3	6.095	0.002	11.79	0.002	17.686	0.031	23.755	0.109	42.221	3.074	-0.261	0.031	0.035	0.107	11.916	2.986	1.86	0	37.35	0	13	0.610993	0.345617
2020-02-04 01:16 CET	ETH 3	6.156	0.002	11.876	0.004	17.834	0.019	23.912	0.091	41.233	2.194	-0.262	0.02	0.018	0.091	10.722	2.13	1.92	0	37.44	0	13	0.609972	0.329393
2020-02-08 07:27 CET	ETH 3	6.082	0.003	11.811	0.003	17.702	0.027	23.702	0.1	37.495	3.012	-0.252	0.025	-0.057	0.096	7.302	2.925	1.85	0	37.37	0	13	0.620185	0.257816
2020-02-09 20:50 CET	ETH 3	6.12	0.002	11.834	0.003	17.753	0.022	23.786	0.118	37.466	3.756	-0.264	0.021	-0.021	0.116	7.186	3.645	1.89	0	37.39	0	13	0.607929	0.292173
2020-02-11 23:35 CET	ETH 3	6.143	0.002	11.86	0.003	17.811	0.027	23.834	0.129	39.81	3.07	-0.255	0.028	-0.026	0.127	9.387	2.979	1.91	0	37.42	0	13	0.617121	0.287401
2020-02-13 22:18 CET	ETH 3	6.138	0.002	11.845	0.002	17.8	0.022	23.853	0.118	37.276	3.417	-0.247	0.022	0.023	0.114	6.962	3.317	1.91	0	37.4	0	13	0.625292	0.334165
2020-02-15 14:00 CET	ETH 3	6.149	0.002	11.833	0.003	17.779	0.02	23.756	0.148	37.11	2.96	-0.266	0.02	-0.048	0.143	6.813	2.873	1.92	0	37.39	0	13	0.605887	0.266405
2020-02-17 03:26 CET	ETH 3	6.15	0.002	11.883	0.003	17.842	0.032	23.918	0.083	37.389	3.048	-0.255	0.031	0.01	0.08	6.984	2.959	1.92	0	37.44	0	13	0.617121	0.321758
2020-02-19 01:53 CET	ETH 3	6.039	0.002	11.73	0.004	17.558	0.041	23.584	0.13	37.605	3.066	-0.271	0.042	-0.013	0.131	7.611	2.974	1.8	0	37.28	0	13	0.60078	0.299808
2020-02-21 00:03 CET	ETH 3	6.098	0.002	11.801	0.002	17.7	0.018	23.746	0.083	34.651	3.05	-0.261	0.017	0.004	0.082	4.541	2.962	1.86	0	37.36	0	13	0.610993	0.316032
2020-02-22 13:44 CET	ETH 3	6.137	0.001	11.86	0.004	17.792	0.027	23.854	0.072	36.772	2.693	-0.267	0.026	-0.006	0.069	6.446	2.614	1.9	0	37.42	0	13	0.604866	0.306488
2020-02-24 03:05 CET	ETH 3	6.105	0.001	11.817	0.003	17.726	0.023	23.767	0.084	38.89	2.096	-0.258	0.022	-0.005	0.083	8.618	2.034	1.87	0	37.37	0	13	0.614057	0.307442
2020-02-28 00:53 CET	ETH 3	6.145	0.002	11.819	0.004	17.784	0.024	23.728	0.101	35.2	3.152	-0.244	0.026	-0.048	0.101	4.989	3.063	1.91	0	37.38	0	13	0.628355	0.266405
2020-02-29 08:05 CET	ETH 3	6.164	0.002	11.846	0.003	17.824	0.017	23.808	0.122	37.584	3.555	-0.25	0.018	-0.024	0.117	7.231	3.45	1.93	0	37.4	0	13	0.622228	0.28931
2020-02-29 12:14 CET	ETH 3	6.163	0.002	11.878	0.002	17.846	0.033	23.836	0.067	36.585	4.836	-0.258	0.032	-0.059	0.067	6.2	4.692	1.93	0	37.44	0	13	0.614057	0.255907
2020-02-29 16:23 CET	ETH 3	6.171	0.002	11.862	0.002	17.847	0.022	23.878	0.12	37.566	1.552	-0.251	0.022	0.012	0.118	7.175	1.508	1.94	0	37.42	0	13	0.621206	0.323667
2020-03-02 12:39 CET	ETH 3	6.118	0.002	11.85	0.003	17.802	0.02	23.835	0.092	44.611	3.008	-0.229	0.02	-0.006	0.089	14.093	2.921	1.88	0	37.41	0	13	0.643675	0.306488
2020-03-04 10:41 CET	ETH 3	6.157	0.002	11.863	0.002	17.832	0.021	23.782	0.094	37.224	3.465	-0.252	0.02	-0.082	0.092	6.856	3.363	1.93	0	37.42	0	13	0.620185	0.233957

## Sheet: slopes
ID	Sample	δ47 (raw)	∆47 (raw)		δ48 (raw)	∆48 (raw)	∆48 (raw, norm)
2020-01-13 16:39 CET	HG	-22.105	-0.841		-13.167	-0.267	0.0742257		∆47	Intercept	Error	Slope	Error	Distinguishable from 0?
2020-01-15 20:11 CET	HG	-1.331	-0.843		-1.465	-0.363	-0.0217743		HG	-0.83266	0.00165791	9.70973e-05	8.95189e-05	no
2020-01-17 15:46 CET	HG	17.937	-0.832		24.287	-0.348	-0.00677431		25G	0.0544851	0.00326415	0.000135778	0.000138994	no
2020-01-21 16:48 CET	HG	-31.328	-0.841		-18.689	-0.297	0.0442257		ETH 1 & 2	-0.651672	0.00112934	-1.39279e-05	7.73381e-05	no
2020-01-22 17:45 CET	HG	-2.418	-0.844		-3.412	-0.329	0.0122257
2020-01-24 17:04 CET	HG	16.966	-0.835		22.356	-0.327	0.0142257		∆48	Intercept	Error	Slope	Error	Distinguishable from 0?
2020-01-28 16:57 CET	HG	-30.142	-0.835		-17.954	-0.271	0.0702257		HG	-0.307634	0.00687577	-0.000459193	0.000436231	no
2020-01-29 18:15 CET	HG	-2.619	-0.825		-3.691	-0.263	0.0782257		25G	0.0335914	0.00660821	-0.00017301	0.00015322	no
2020-01-31 21:04 CET	HG	16.258	-0.816		20.856	-0.246	0.0952257		merged gas	–	–	-0.000224233	0.000157872	no
2020-02-04 18:45 CET	HG	-23.064	-0.835		-14.136	-0.265	0.0762257		ETH 1 & 2	-0.18045	0.0041216	3.33634e-05	0.000232882	no
2020-02-05 15:51 CET	HG	-2.383	-0.838		-3.31	-0.276	0.0652257
2020-02-10 18:09 CET	HG	16.895	-0.826		22.306	-0.344	-0.00277431		Note that the equilbrium gases are not used directly to calcualte the ∆ CDES values of the carboante samples.
2020-02-11 15:15 CET	HG	-21.804	-0.834		-13.349	-0.284	0.0572257
2020-02-12 16:58 CET	HG	-2.686	-0.823		-4.064	-0.308	0.0332257
2020-02-14 17:11 CET	HG	15.79	-0.836		20.172	-0.312	0.0292257
2020-02-18 17:35 CET	HG	-26.602	-0.843		-15.789	-0.311	0.0302257
2020-02-19 18:32 CET	HG	-2.396	-0.832		-3.482	-0.326	0.0152257
2020-02-21 16:55 CET	HG	16.806	-0.831		21.979	-0.317	0.0242257
2020-02-25 17:16 CET	HG	-26.918	-0.822		-16.515	-0.336	0.00522569
2020-02-26 18:34 CET	HG	-2.292	-0.837		-3.147	-0.327	0.0142257
2020-02-28 15:29 CET	HG	16.43	-0.834		21.314	-0.311	0.0302257
2020-03-03 18:07 CET	HG	-26.987	-0.826		-16.647	-0.342	-0.000774311
2020-01-14 21:58 CET	25G	-3.274	0.042		-6.675	0.025	0.025
2020-01-16 18:31 CET	25G	-3.153	0.048		-6.438	0.039	0.039
2020-01-20 19:38 CET	25G	-0.543	0.037		71.645	0.013	0.013
2020-01-23 15:15 CET	25G	-26.795	0.047		17.251	0.009	0.009
2020-01-27 19:06 CET	25G	17.499	0.069		34.369	0.04	0.04
2020-01-30 19:45 CET	25G	-3.386	0.064		-6.917	0.005	0.005
2020-02-03 16:57 CET	25G	-26.241	0.072		18.258	0.075	0.075
2020-02-06 17:36 CET	25G	36.686	0.048		73.175	0.001	0.001
2020-02-07 18:39 CET	25G	-3.4	0.067		-6.896	0.052	0.052
2020-02-10 22:20 CET	25G	-27.507	0.059		15.736	0.033	0.033
2020-02-13 18:09 CET	25G	37.495	0.057		74.665	0.013	0.013
2020-02-17 20:18 CET	25G	37.483	0.067		74.62	0.044	0.044
2020-02-20 19:54 CET	25G	-3.42	0.049		-6.931	0.009	0.009
2020-02-24 20:12 CET	25G	-27.137	0.026		16.572	0.042	0.042
2020-02-27 16:34 CET	25G	37.367	0.061		74.34	0.015	0.015
2020-03-02 16:43 CET	25G	-3.088	0.064		-6.383	0.048	0.048
2020-01-16 00:20 CET	ETH1	17.288	-0.665		22.806	-0.165
2020-01-16 13:46 CET	ETH1	17.27	-0.656		22.705	-0.221
2020-01-17 07:07 CET	ETH1	17.283	-0.669		22.801	-0.179
2020-01-18 04:14 CET	ETH1	17.253	-0.653		22.627	-0.248
2020-01-19 09:23 CET	ETH1	17.266	-0.643		22.788	-0.165
2020-01-21 12:38 CET	ETH1	17.354	-0.654		22.911	-0.192
2020-01-22 01:05 CET	ETH1	17.291	-0.662		22.836	-0.146
2020-01-24 03:53 CET	ETH1	17.125	-0.652		22.533	-0.205
2020-01-25 22:28 CET	ETH1	17.352	-0.639		23.017	-0.197
2020-01-28 03:29 CET	ETH1	17.285	-0.632		22.834	-0.151
2020-01-30 02:34 CET	ETH1	17.215	-0.658		22.795	-0.192
2020-02-01 05:26 CET	ETH1	17.34	-0.643		22.917	-0.138
2020-02-02 18:56 CET	ETH1	17.284	-0.655		22.93	-0.112
2020-02-04 14:20 CET	ETH1	17.317	-0.663		22.792	-0.228
2020-02-06 13:26 CET	ETH1	17.288	-0.654		22.81	-0.183
2020-02-08 19:55 CET	ETH1	17.347	-0.647		22.942	-0.121
2020-02-10 09:19 CET	ETH1	17.343	-0.652		22.893	-0.201
2020-02-12 12:27 CET	ETH1	17.161	-0.653		22.712	-0.171
2020-02-14 11:27 CET	ETH1	17.339	-0.653		22.947	-0.164
2020-02-17 16:09 CET	ETH1	17.373	-0.654		22.987	-0.171
2020-02-19 14:22 CET	ETH1	17.28	-0.638		22.866	-0.16
2020-02-21 12:45 CET	ETH1	17.322	-0.66		22.83	-0.202
2020-02-23 02:11 CET	ETH1	17.401	-0.65		23.02	-0.152
2020-02-24 16:03 CET	ETH1	17.432	-0.656		23.041	-0.187
2020-02-26 14:20 CET	ETH1	17.409	-0.64		23.076	-0.19
2020-02-29 03:56 CET	ETH1	17.385	-0.655		22.895	-0.227
2020-03-03 05:11 CET	ETH1	17.369	-0.646		22.976	-0.185
2020-01-16 04:31 CET	ETH2	-11.494	-0.652		-10.692	-0.198
2020-01-16 22:47 CET	ETH2	-11.457	-0.656		-10.641	-0.185
2020-01-17 11:34 CET	ETH2	-11.535	-0.656		-10.793	-0.228
2020-01-18 08:23 CET	ETH2	-11.571	-0.661		-10.793	-0.191
2020-01-19 21:52 CET	ETH2	-11.44	-0.656		-10.572	-0.172
2020-01-22 05:14 CET	ETH2	-11.442	-0.65		-10.617	-0.195
2020-01-22 22:08 CET	ETH2	-11.549	-0.652		-10.719	-0.125
2020-01-24 21:14 CET	ETH2	-11.387	-0.653		-10.496	-0.162
2020-01-26 11:36 CET	ETH2	-11.206	-0.66		-10.175	-0.166
2020-01-28 21:03 CET	ETH2	-11.34	-0.642		-10.482	-0.213
2020-01-30 15:36 CET	ETH2	-11.505	-0.655		-10.69	-0.18
2020-02-01 17:59 CET	ETH2	-11.447	-0.651		-10.53	-0.14
2020-02-03 07:26 CET	ETH2	-11.361	-0.652		-10.536	-0.176
2020-02-05 07:16 CET	ETH2	-11.521	-0.651		-10.711	-0.173
2020-02-07 06:04 CET	ETH2	-11.496	-0.655		-10.711	-0.173
2020-02-09 08:21 CET	ETH2	-11.409	-0.642		-10.564	-0.151
2020-02-11 06:42 CET	ETH2	-11.393	-0.669		-10.411	-0.142
2020-02-13 05:26 CET	ETH2	-11.486	-0.642		-10.688	-0.197
2020-02-15 01:30 CET	ETH2	-11.404	-0.646		-10.577	-0.193
2020-02-16 14:57 CET	ETH2	-11.352	-0.653		-10.51	-0.165
2020-02-18 08:50 CET	ETH2	-11.269	-0.647		-10.399	-0.192
2020-02-20 07:01 CET	ETH2	-11.156	-0.636		-10.255	-0.169
2020-02-22 01:13 CET	ETH2	-11.357	-0.647		-10.52	-0.18
2020-02-23 14:38 CET	ETH2	-11.229	-0.64		-10.327	-0.177
2020-02-25 08:41 CET	ETH2	-11.198	-0.655		-10.267	-0.212
2020-02-27 07:04 CET	ETH2	-11.351	-0.641		-10.427	-0.184
2020-03-01 04:53 CET	ETH2	-11.287	-0.657		-10.476	-0.238
2020-03-03 22:15 CET	ETH2	-11.488	-0.665		-10.688	-0.184

## Sheet: ETF
	ETF based on ETH 1, ETH 2, and ETH 3 to convert raw values of samples to "CDES90,uc"
	∆47	Intercept	Intended		Slope:	1.0213
	ETH 1 & 2	-0.651672	0.212		Intercept:	0.877553
	ETH 3	-0.257077	0.615
	∆48	Intercept	Intended		Slope:	0.95436
	ETH 1 & 2	-0.18045	0.14		Intercept:	0.312214
	ETH 3	-0.0138462	0.299
	Long-term "intended" values
		∆47 (CDES90)	∆48 (CDES90)
	ETH1	0.212	0.14
	ETH2	0.212	0.14
	ETH3	0.615	0.299

## Sheet: samples
ID	Sample	δ45 (raw)	δ45 (raw) SD	δ46 (raw)	δ46 (raw) SD	δ47 (raw)	δ47 (raw) SD	δ48 (raw)	δ48 (raw) SD	δ49 (raw)	δ49 (raw) SD	∆47 (raw)	∆47 (raw) SD	∆48 (raw)	∆48 (raw) SD	∆49 (raw)	∆49 (raw) SD	δ13C VPDB (CO2)	δ13C VPDB (CO2) SD	δ18O VSMOW (CO2)	δ18O VSMOW (CO2) SD	Acquisitions	∆47 (CDES90,uc)	∆48 (CDES90,uc)
2020-02-05 03:05 CET	Obi 87i	-3.973	0.002	5.748	0.003	1.313	0.023	11.487	0.103	17.2	2.15	-0.216	0.021	-0.042	0.103	10.084	2.134	-8.64	0	31.17	0	13	0.656952	0.272131
2020-02-09 16:41 CET	Obi 87i	-4.005	0.002	5.675	0.002	1.211	0.021	11.357	0.064	16.77	3.921	-0.213	0.02	-0.026	0.063	9.836	3.896	-8.68	0	31.09	0	13	0.660016	0.287401
2020-02-12 07:54 CET	Obi 87i	-3.995	0.003	5.752	0.001	1.293	0.016	11.515	0.1	15.061	3.548	-0.216	0.017	-0.021	0.1	7.978	3.523	-8.67	0	31.17	0	13	0.656952	0.292173
2020-02-15 22:18 CET	Obi 87i	-3.959	0.002	5.626	0.002	1.204	0.028	11.231	0.135	13.854	2.87	-0.219	0.028	-0.052	0.134	6.988	2.848	-8.63	0	31.04	0	13	0.653888	0.262587
2020-02-18 04:39 CET	Obi 87i	-3.873	0.002	5.74	0.002	1.423	0.024	11.484	0.091	13.943	3.491	-0.2	0.023	-0.028	0.094	6.76	3.467	-8.54	0	31.16	0	13	0.673293	0.285492
2020-02-20 15:45 CET	Obi 87i	-3.975	0.002	5.75	0.003	1.325	0.019	11.509	0.139	14.976	2.107	-0.203	0.021	-0.023	0.133	7.875	2.093	-8.65	0	31.17	0	13	0.670229	0.290264
2020-02-23 22:56 CET	Obi 87i	-3.998	0.002	5.663	0.003	1.2	0.028	11.252	0.12	13.457	3.157	-0.22	0.026	-0.105	0.121	6.562	3.132	-8.67	0	31.08	0	13	0.652867	0.212006

## Sheet: correction (ETH)
ID	Sample	∆47 (CDES90,uc)	∆48 (CDES90,uc)	Relative time	residual ∆47	residual ∆48	drift correction ∆47	∆47 (CDES90) -final	drift correction ∆48	∆48 (CDES90) -final
2020-02-05 03:05 CET	Obi 87i	0.656952	0.272131	20.1278	#N/A	#N/A	-0.000836879	0.657789	0.0106786	0.261452
2020-02-09 16:41 CET	Obi 87i	0.660016	0.287401	24.6944	#N/A	#N/A	-0.00118586	0.661202	0.00659123	0.28081
2020-02-12 07:54 CET	Obi 87i	0.656952	0.292173	27.3285	#N/A	#N/A	-0.000934106	0.657886	0.00562664	0.286546
2020-02-15 22:18 CET	Obi 87i	0.653888	0.262587	30.9285	#N/A	#N/A	-5.83039e-05	0.653946	0.00543596	0.257152
2020-02-18 04:39 CET	Obi 87i	0.673293	0.285492	33.1931	#N/A	#N/A	0.000743812	0.672549	0.00511876	0.280373
2020-02-20 15:45 CET	Obi 87i	0.670229	0.290264	35.6556	#N/A	#N/A	0.00174135	0.668487	0.00362688	0.286637
2020-02-23 22:56 CET	Obi 87i	0.652867	0.212006	38.9549	#N/A	#N/A	0.00307193	0.649795	-0.0015913	0.213598
2020-01-16 00:20 CET	ETH1	0.198388	0.154745	0.0131944	-0.0136124	0.0147448	-0.0079779	0.206366	-0.0138522	0.168597													shot noise
2020-01-16 13:46 CET	ETH1	0.207579	0.101301	0.572917	-0.00442065	-0.0386994	-0.00678683	0.214366	-0.013479	0.11478													0	-0.007	0.007
2020-01-17 07:07 CET	ETH1	0.194302	0.141384	1.29583	-0.0176976	0.00138371	-0.00541128	0.199714	-0.0123388	0.153722													130	-0.007	0.007
2020-01-18 04:14 CET	ETH1	0.210643	0.0755328	2.17569	-0.00135675	-0.0644672	-0.00396718	0.21461	-0.0101948	0.0857276
2020-01-19 09:23 CET	ETH1	0.220856	0.154745	3.39028	0.00885627	0.0147448	-0.00234941	0.223206	-0.00636241	0.161107
2020-01-21 12:38 CET	ETH1	0.209622	0.128977	5.52569	-0.00237805	-0.011023	-0.000406139	0.210028	0.00121773	0.127759
2020-01-22 01:05 CET	ETH1	0.201452	0.172878	6.04444	-0.0105485	0.0328776	-8.18692e-05	0.201533	0.00300669	0.169871
2020-01-24 03:53 CET	ETH1	0.211665	0.11657	8.16111	-0.000335446	-0.0234297	0.000759536	0.210905	0.00939111	0.107179
2020-01-25 22:28 CET	ETH1	0.224941	0.124205	9.93542	0.0129415	-0.0157948	0.00098943	0.223952	0.0131819	0.111023
2020-01-28 03:29 CET	ETH1	0.232091	0.168106	12.1444	0.0200906	0.0281058	0.000859828	0.231231	0.0156665	0.152439
2020-01-30 02:34 CET	ETH1	0.205537	0.128977	14.1062	-0.00646325	-0.011023	0.000506009	0.205031	0.0159818	0.112995
2020-02-01 05:26 CET	ETH1	0.220856	0.180512	16.2257	0.00885627	0.0405125	1.06849e-05	0.220846	0.0148102	0.165702
2020-02-02 18:56 CET	ETH1	0.208601	0.205326	17.7882	-0.00339935	0.0653259	-0.0003612	0.208962	0.0133088	0.192017
2020-02-04 14:20 CET	ETH1	0.20043	0.0946201	19.5965	-0.0115698	-0.0453799	-0.00074187	0.201172	0.0112818	0.0833382
2020-02-06 13:26 CET	ETH1	0.209622	0.137566	21.559	-0.00237805	-0.00243373	-0.00104313	0.210665	0.00913163	0.128435
2020-02-08 19:55 CET	ETH1	0.216771	0.196737	23.8292	0.00477106	0.0567366	-0.00119295	0.217964	0.00714529	0.189591													shot noise
2020-02-10 09:19 CET	ETH1	0.211665	0.120388	25.3875	-0.000335446	-0.0196122	-0.00115333	0.212818	0.00623487	0.114153													0	-0.023	0.023
2020-02-12 12:27 CET	ETH1	0.210643	0.149019	27.5181	-0.00135675	0.0090186	-0.00090269	0.211546	0.00559442	0.143424													130	-0.023	0.023
2020-02-14 11:27 CET	ETH1	0.210643	0.155699	29.4764	-0.00135675	0.0156991	-0.00047926	0.211123	0.0054522	0.150247
2020-02-17 16:09 CET	ETH1	0.209622	0.149019	32.6722	-0.00237805	0.0090186	0.000546382	0.209076	0.00525307	0.143766
2020-02-19 14:22 CET	ETH1	0.225963	0.159517	34.5979	0.0139628	0.0195166	0.00130366	0.224659	0.00446944	0.155047
2020-02-21 12:45 CET	ETH1	0.203494	0.119433	36.5306	-0.00850586	-0.0205666	0.00210595	0.201388	0.00265003	0.116783
2020-02-23 02:11 CET	ETH1	0.213707	0.167151	38.0903	0.00170716	0.0271514	0.0027405	0.210967	0.000192365	0.166959
2020-02-24 16:03 CET	ETH1	0.207579	0.133749	39.6681	-0.00442065	-0.00625117	0.00332796	0.204251	-0.00328983	0.137039
2020-02-26 14:20 CET	ETH1	0.22392	0.130886	41.5965	0.0119202	-0.00911425	0.00390646	0.220014	-0.00881505	0.139701
2020-02-29 03:56 CET	ETH1	0.208601	0.0955744	44.1632	-0.00339935	-0.0444256	0.00429092	0.20431	-0.0174176	0.112992
2020-03-03 05:11 CET	ETH1	0.217792	0.135658	47.2153	0.00579236	-0.00434245	0.00387451	0.213918	-0.0255522	0.16121
2020-01-16 04:31 CET	ETH2	0.211665	0.123251	0.1875	-0.000335446	-0.0167491	-0.00759475	0.219259	-0.0137902	0.137041	0.179901	0.000131268
2020-01-16 22:47 CET	ETH2	0.207579	0.135658	0.948611	-0.00442065	-0.00434245	-0.00604977	0.213629	-0.0129687	0.148626	0.364429	0.0030762
2020-01-17 11:34 CET	ETH2	0.207579	0.0946201	1.48125	-0.00442065	-0.0453799	-0.00508661	0.212666	-0.0119472	0.106567	0.00307521	0.0276857
2020-01-18 08:23 CET	ETH2	0.202473	0.129931	2.34861	-0.00952716	-0.0100686	-0.00371128	0.206184	-0.00969907	0.13963	0.243691	79
2020-01-19 21:52 CET	ETH2	0.207579	0.148064	3.91042	-0.00442065	0.00806424	-0.00177748	0.209357	-0.00454828	0.152613	0.000186789	0.0605533
2020-01-22 05:14 CET	ETH2	0.213707	0.126114	6.21736	0.00170716	-0.0138861	1.49136e-05	0.213692	0.00358816	0.122526
2020-01-22 22:08 CET	ETH2	0.211665	0.192919	6.92153	-0.000335446	0.0529192	0.000354353	0.21131	0.00585967	0.18706
2020-01-24 21:14 CET	ETH2	0.210643	0.157608	8.88403	-0.00135675	0.0176078	0.000897453	0.209746	0.0111263	0.146482
2020-01-26 11:36 CET	ETH2	0.203494	0.15379	10.4826	-0.00850586	0.0137904	0.000993411	0.202501	0.0140267	0.139764
2020-01-28 21:03 CET	ETH2	0.221878	0.108935	12.8764	0.00987757	-0.0310645	0.000746786	0.221131	0.0159726	0.0929629
2020-01-30 15:36 CET	ETH2	0.208601	0.140429	14.6493	-0.00339935	0.000429353	0.000385384	0.208215	0.015808	0.124621
2020-02-01 17:59 CET	ETH2	0.212686	0.178604	16.7486	0.000685856	0.0386038	-0.000115798	0.212802	0.0143511	0.164253
2020-02-03 07:26 CET	ETH2	0.211665	0.144247	18.309	-0.000335446	0.00424679	-0.000478368	0.212143	0.0127415	0.131505
2020-02-05 07:16 CET	ETH2	0.212686	0.14711	20.3021	0.000685856	0.00710988	-0.000866026	0.213552	0.0104829	0.136627
2020-02-07 06:04 CET	ETH2	0.208601	0.14711	22.2521	-0.00339935	0.00710988	-0.0011135	0.209714	0.0084519	0.138658
2020-02-09 08:21 CET	ETH2	0.221878	0.168106	24.3472	0.00987757	0.0281058	-0.00119314	0.223071	0.00679904	0.161307
2020-02-11 06:42 CET	ETH2	0.194302	0.176695	26.2785	-0.0176976	0.036695	-0.00107607	0.195379	0.00588815	0.170807
2020-02-13 05:26 CET	ETH2	0.221878	0.124205	28.2257	0.00987757	-0.0157948	-0.000770161	0.222648	0.00550815	0.118697
2020-02-15 01:30 CET	ETH2	0.217792	0.128023	30.0618	0.00579236	-0.0119773	-0.000319685	0.218112	0.00544751	0.122575
2020-02-16 14:57 CET	ETH2	0.210643	0.154745	31.6222	-0.00135675	0.0147448	0.000170704	0.210473	0.00540036	0.149344
2020-02-18 08:50 CET	ETH2	0.216771	0.128977	33.3674	0.00477106	-0.011023	0.000811291	0.21596	0.0050625	0.123915
2020-02-20 07:01 CET	ETH2	0.228005	0.150927	35.2917	0.0160054	0.0109273	0.00158992	0.226415	0.003956	0.146971
2020-02-22 01:13 CET	ETH2	0.216771	0.140429	37.05	0.00477106	0.000429353	0.00232072	0.21445	0.00193739	0.138492
2020-02-23 14:38 CET	ETH2	0.22392	0.143292	38.609	0.0119202	0.00329243	0.00294177	0.220978	-0.000841275	0.144134
2020-02-25 08:41 CET	ETH2	0.208601	0.10989	40.3611	-0.00339935	-0.0301102	0.00355743	0.205043	-0.00512878	0.115019
2020-02-27 07:04 CET	ETH2	0.222899	0.136612	42.2937	0.0108989	-0.00338809	0.00406201	0.218837	-0.0110792	0.147691
2020-03-01 04:53 CET	ETH2	0.206558	0.0850765	45.2028	-0.00544195	-0.0549235	0.00427412	0.202284	-0.0207707	0.105847
2020-03-03 22:15 CET	ETH2	0.198388	0.136612	47.9264	-0.0136124	-0.00338809	0.00359881	0.194789	-0.0262574	0.162869
2020-01-16 08:40 CET	ETH3	0.607929	0.307442	0.360417	-0.00707055	0.00844242	-0.00722566	0.615155	-0.0136791	0.321121
2020-01-17 02:58 CET	ETH3	0.606908	0.266405	1.12292	-0.00809185	-0.0325951	-0.00572422	0.612632	-0.0126701	0.279075
2020-01-18 00:06 CET	ETH3	0.613036	0.274994	2.00347	-0.00196404	-0.0240058	-0.00423094	0.617267	-0.010667	0.285661
2020-01-18 20:55 CET	ETH3	0.619164	0.335119	2.87083	0.00416377	0.0361189	-0.00299099	0.622155	-0.00809056	0.343209
2020-01-20 23:47 CET	ETH3	0.618142	0.293127	4.99028	0.00314247	-0.00587299	-0.00079725	0.61894	-0.000680223	0.293807
2020-01-23 10:51 CET	ETH3	0.608951	0.322712	7.45139	-0.00604925	0.0237122	0.000555702	0.608395	0.00744923	0.315263
2020-01-29 09:27 CET	ETH3	0.615079	0.307442	13.3931	7.85616e-05	0.00844242	0.000652225	0.614426	0.0160493	0.291393
2020-01-31 08:13 CET	ETH3	0.605887	0.32653	15.3417	-0.00911315	0.0275296	0.000223719	0.605663	0.0154514	0.311078
2020-02-02 06:26 CET	ETH3	0.610993	0.345617	17.2674	-0.00400664	0.0466168	-0.000239733	0.611233	0.0138493	0.331768
2020-02-04 01:16 CET	ETH3	0.609972	0.329393	19.0521	-0.00502794	0.0303927	-0.000635662	0.610608	0.0119036	0.317489
2020-02-08 07:27 CET	ETH3	0.620185	0.257816	23.3097	0.00518507	-0.0411843	-0.00117967	0.621365	0.00753507	0.250281
2020-02-09 20:50 CET	ETH3	0.607929	0.292173	24.8674	-0.00707055	-0.00682735	-0.00118	0.609109	0.00649505	0.285678
2020-02-11 23:35 CET	ETH3	0.617121	0.287401	26.9819	0.00212116	-0.0115991	-0.000986988	0.618108	0.00569678	0.281704
2020-02-13 22:18 CET	ETH3	0.625292	0.334165	28.9285	0.0102916	0.0351645	-0.000615345	0.625907	0.00546546	0.328699
2020-02-15 14:00 CET	ETH3	0.605887	0.266405	30.5826	-0.00911315	-0.0325951	-0.000166053	0.606053	0.0054431	0.260962
2020-02-17 03:26 CET	ETH3	0.617121	0.321758	32.1424	0.00212116	0.0227578	0.000352759	0.616768	0.00534496	0.316413
2020-02-19 01:53 CET	ETH3	0.60078	0.299808	34.0778	-0.0142197	0.000807536	0.00109254	0.599688	0.00476532	0.295042
2020-02-21 00:03 CET	ETH3	0.610993	0.316032	36.0014	-0.00400664	0.0170317	0.00188558	0.609108	0.00327308	0.312759
2020-02-22 13:44 CET	ETH3	0.604866	0.306488	37.5715	-0.0101345	0.00748806	0.00253337	0.602332	0.00111663	0.305371
2020-02-24 03:05 CET	ETH3	0.614057	0.307442	39.1278	-0.00094274	0.00844242	0.00313563	0.610922	-0.00198448	0.309427
2020-02-28 00:53 CET	ETH3	0.628355	0.266405	43.0361	0.0133555	-0.0325951	0.00418848	0.624167	-0.0135814	0.279986
2020-02-29 08:05 CET	ETH3	0.622228	0.28931	44.3361	0.00722767	-0.00969043	0.004296	0.617932	-0.0179953	0.307305
2020-02-29 12:14 CET	ETH3	0.614057	0.255907	44.509	-0.00094274	-0.043093	0.00429804	0.609759	-0.0185668	0.274474
2020-02-29 16:23 CET	ETH3	0.621206	0.323667	44.6819	0.00620637	0.0246665	0.00429696	0.616909	-0.0191309	0.342797
2020-03-02 12:39 CET	ETH3	0.643675	0.306488	46.5264	0.028675	0.00748806	0.00407128	0.639604	-0.0242915	0.33078
2020-03-04 10:41 CET	ETH3	0.620185	0.233957	48.4444	0.00518507	-0.0650433	0.00334826	0.616837	-0.0262926	0.260249
				2020-01-16 00:01 CET	<– time ZERO
Correction polynomial fitted on ETH1, ETH2, and ETH3 residuals
	x^6	x^5	x^4	x^3	x^2	x^1	intercept
∆47		2.38151e-10	-7.41176e-08	6.03314e-06	-0.000186709	0.00223538	-0.00800736
∆48	5.07115e-10	-7.40547e-08	3.9925e-06	-9.56028e-05	0.000878897	0.000183094	-0.0138548
	Time	residual ∆47	residual ∆48
	0.0131944	-0.0136124	0.0147448
	0.572917	-0.00442065	-0.0386994
	1.29583	-0.0176976	0.00138371
	2.17569	-0.00135675	-0.0644672
	3.39028	0.00885627	0.0147448
	5.52569	-0.00237805	-0.011023
	6.04444	-0.0105485	0.0328776
	8.16111	-0.000335446	-0.0234297
	9.93542	0.0129415	-0.0157948
	12.1444	0.0200906	0.0281058
	14.1062	-0.00646325	-0.011023
	16.2257	0.00885627	0.0405125
	17.7882	-0.00339935	0.0653259
	19.5965	-0.0115698	-0.0453799
	21.559	-0.00237805	-0.00243373
	23.8292	0.00477106	0.0567366
	25.3875	-0.000335446	-0.0196122
	27.5181	-0.00135675	0.0090186
	29.4764	-0.00135675	0.0156991
	32.6722	-0.00237805	0.0090186
	34.5979	0.0139628	0.0195166
	36.5306	-0.00850586	-0.0205666
	38.0903	0.00170716	0.0271514
	39.6681	-0.00442065	-0.00625117
	41.5965	0.0119202	-0.00911425
	44.1632	-0.00339935	-0.0444256
	47.2153	0.00579236	-0.00434245
	0.1875	-0.000335446	-0.0167491
	0.948611	-0.00442065	-0.00434245
	1.48125	-0.00442065	-0.0453799
	2.34861	-0.00952716	-0.0100686
	3.91042	-0.00442065	0.00806424
	6.21736	0.00170716	-0.0138861
	6.92153	-0.000335446	0.0529192
	8.88403	-0.00135675	0.0176078
	10.4826	-0.00850586	0.0137904
	12.8764	0.00987757	-0.0310645
	14.6493	-0.00339935	0.000429353
	16.7486	0.000685856	0.0386038
	18.309	-0.000335446	0.00424679
	20.3021	0.000685856	0.00710988
	22.2521	-0.00339935	0.00710988
	24.3472	0.00987757	0.0281058
	26.2785	-0.0176976	0.036695
	28.2257	0.00987757	-0.0157948
	30.0618	0.00579236	-0.0119773
	31.6222	-0.00135675	0.0147448
	33.3674	0.00477106	-0.011023
	35.2917	0.0160054	0.0109273
	37.05	0.00477106	0.000429353
	38.609	0.0119202	0.00329243
	40.3611	-0.00339935	-0.0301102
	42.2937	0.0108989	-0.00338809
	45.2028	-0.00544195	-0.0549235
	47.9264	-0.0136124	-0.00338809
	0.360417	-0.00707055	0.00844242
	1.12292	-0.00809185	-0.0325951
	2.00347	-0.00196404	-0.0240058
	2.87083	0.00416377	0.0361189
	4.99028	0.00314247	-0.00587299
	7.45139	-0.00604925	0.0237122
	13.3931	7.85616e-05	0.00844242
	15.3417	-0.00911315	0.0275296
	17.2674	-0.00400664	0.0466168
	19.0521	-0.00502794	0.0303927
	23.3097	0.00518507	-0.0411843
	24.8674	-0.00707055	-0.00682735
	26.9819	0.00212116	-0.0115991
	28.9285	0.0102916	0.0351645
	30.5826	-0.00911315	-0.0325951
	32.1424	0.00212116	0.0227578
	34.0778	-0.0142197	0.000807536
	36.0014	-0.00400664	0.0170317
	37.5715	-0.0101345	0.00748806
	39.1278	-0.00094274	0.00844242
	43.0361	0.0133555	-0.0325951
	44.3361	0.00722767	-0.00969043
	44.509	-0.00094274	-0.043093
	44.6819	0.00620637	0.0246665
	46.5264	0.028675	0.00748806
	48.4444	0.00518507	-0.0650433
